# Supplementary material for: Synthesis of 3-((trifluoromethyl)thio)indoles via a reaction of 2-alkynylaniline with trifluoromethanesulfanylamide
Source: Royal Society of Chemistry journal article supplement (doi:10.1039/c3cc45958f), 2013-10-22

# Synthesis of 3-((trifluoromethyl)thio)indoles via a reaction of 2-alkynylaniline with trifluoromethanesulfanylamide

Jie Sheng,<sup>a</sup> Shaoyu Li,<sup>a</sup> and Jie Wu\*,<sup>ab</sup>

<sup>a</sup> *Department of Chemistry, Fudan University, 220 Handan Road, Shanghai 200433, China*

<sup>b</sup> *State Key Laboratory of Organometallic Chemistry, Shanghai Institute of Organic Chemistry, Chinese Academy  
of Sciences, Shanghai 200032, China*

jie\_wu@fudan.edu.cn

## Supporting Information

1. General experimental methods (S2).
2. General experimental procedure and characterization data (S2-S8).
3. <sup>19</sup>F, <sup>1</sup>H, and <sup>13</sup>C NMR spectra of compounds **3** (S9-S56).

## General experimental methods:

Unless otherwise stated, all commercial reagents were used as received. All solvents were dried and distilled according to standard procedures. Flash column chromatography was performed using silica gel (60-Å pore size, 32–63 μm, standard grade). Analytical thin-layer chromatography was performed using glass plates pre-coated with 0.25 mm 230–400 mesh silica gel impregnated with a fluorescent indicator (254 nm). Thin layer chromatography plates were visualized by exposure to ultraviolet light. Organic solutions were concentrated on rotary evaporators at ~20 Torr at 25–35 °C. Nuclear magnetic resonance (NMR) spectra are recorded in parts per million from internal tetramethylsilane on the  $\delta$  scale.  $^1\text{H}$  and  $^{13}\text{C}$  NMR spectra were recorded in  $\text{CDCl}_3$  on a Bruker DRX-400 spectrometer operating at 400 MHz and 100 MHz, respectively. All chemical shift values are quoted in ppm and coupling constants quoted in Hz. High resolution mass spectrometry (HRMS) spectra were obtained on a micrOTOF II Instrument.

*General procedure for the synthesis of 3-((trifluoromethyl)thio)indoles via a palladium-catalyzed reaction of 2-alkynylaniline with trifluoromethanesulfanylamide in the presence of bismuth chloride.*

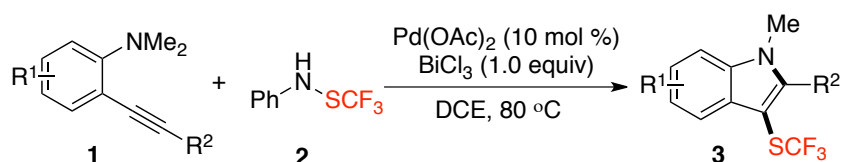

Trifluoromethanesulfanylamide (116.0 mg, 0.6 mmol) was added to a solution of 2-alkynylaniline **1** (0.2 mmol),  $\text{Pd}(\text{OAc})_2$  (0.02 mmol, 4.5 mg), and  $\text{BiCl}_3$  (0.2 mmol, 63.1 mg) in DCE (2.0 mL) under  $\text{N}_2$  atmosphere. The mixture was stirred at 80 °C for 12–16 hours. After completion of the reaction as indicated by TLC, the reaction mixture was filtered through a thin layer of silica gel and washed by  $\text{CH}_2\text{Cl}_2$  ( $3 \times 5.0$  mL). The residue was concentrated in vacuo and purified by column chromatography on silica gel (eluted with PE/EA = 200:1) to provide the product **3**.

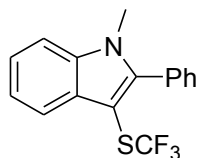

1-Methyl-2-phenyl-3-(trifluoromethylthio)-1*H*-indole (**3a**)

White solid;  $^1\text{H}$  NMR (400 MHz,  $\text{CDCl}_3$ )  $\delta$  3.66 (s, 3H), 7.28–7.36 (m, 2H), 7.39–7.43 (m, 3H), 7.50–7.53 (m, 3H), 7.83 (d,  $J = 7.7$  Hz, 1H);  $^{13}\text{C}$  NMR (100 MHz,  $\text{CDCl}_3$ )  $\delta$  31.7, 92.7, 110.1, 119.6, 121.7, 123.2, 128.5, 129.3, 129.8 (q,  $J = 309.5$  Hz), 129.9, 130.3, 130.9, 137.2, 148.2;  $^{19}\text{F}$  NMR (378 MHz,  $\text{CDCl}_3$ )  $\delta$  -44.44 (s); HRMS (ESI) calcd for  $\text{C}_{16}\text{H}_{13}\text{F}_3\text{NS}$ : 308.0715 ( $\text{M} + \text{H}^+$ ), found: 308.0695.

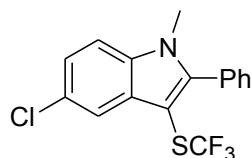

5-Chloro-1-methyl-2-phenyl-3-(trifluoromethylthio)-1*H*-indole (**3b**)

Yellow solid;  $^1\text{H}$  NMR (400 MHz,  $\text{CDCl}_3$ )  $\delta$  3.66 (s, 3H), 7.30–7.32 (m, 2H), 7.42–7.43 (m, 2H), 7.53–7.54 (m, 3H), 7.80 (s, 1H);  $^{13}\text{C}$  NMR (100 MHz,  $\text{CDCl}_3$ )  $\delta$  31.8, 92.4, 111.1, 119.0, 123.5, 127.6, 128.5, 129.3, 129.4, 129.5 (q,  $J = 309.6$  Hz), 130.7, 131.3, 135.5, 149.2;  $^{19}\text{F}$  NMR (378 MHz,  $\text{CDCl}_3$ )  $\delta$  -44.38 (s); HRMS (ESI) calcd for  $\text{C}_{16}\text{H}_{12}\text{ClF}_3\text{NS}$ : 342.0326 ( $\text{M} + \text{H}^+$ ), found: 342.0310.

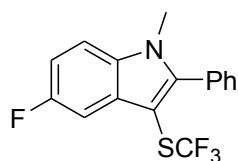

5-Fluoro-1-methyl-2-phenyl-3-(trifluoromethylthio)-1*H*-indole (**3c**)

White solid;  $^1\text{H}$  NMR (400 MHz,  $\text{CDCl}_3$ )  $\delta$  3.64 (s, 3H), 7.04–7.09 (m, 1H), 7.29–7.32 (m, 1H), 7.40–7.42 (m, 2H), 7.47–7.53 (m, 4H);  $^{13}\text{C}$  NMR (100 MHz,  $\text{CDCl}_3$ )  $\delta$  31.8, 92.7, 104.7 (d,  $^2J_{\text{CF}} = 24.5$  Hz), 110.9, 111.0, 111.6 (d,  $^2J_{\text{CF}} = 26.3$  Hz), 128.4, 129.4, 129.5, 129.6 (q,  $J = 309.6$  Hz), 130.7, 133.6, 149.5, 159.2 (d,  $^1J_{\text{CF}} = 236.3$  Hz);  $^{19}\text{F}$  NMR (378 MHz,  $\text{CDCl}_3$ )  $\delta$  -44.44 (s); HRMS (ESI) calcd for  $\text{C}_{16}\text{H}_{12}\text{F}_4\text{NS}$ : 326.0627 ( $\text{M} + \text{H}^+$ ), found: 326.0621.

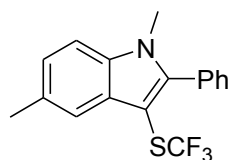

1,5-Dimethyl-2-phenyl-3-(trifluoromethylthio)-1*H*-indole (**3d**)

Brown solid;  $^1\text{H}$  NMR (400 MHz,  $\text{CDCl}_3$ )  $\delta$  2.53 (s, 3H), 3.65 (s, 3H), 7.18 (d,  $J = 8.2$  Hz, 1H), 7.30 (d,  $J = 8.3$  Hz, 1H), 7.42–7.44 (m, 2H), 7.51–7.53 (m, 3H), 7.63 (s, 1H);  $^{13}\text{C}$  NMR (100 MHz,  $\text{CDCl}_3$ )  $\delta$  21.6, 31.7, 92.0, 109.7, 119.2, 124.8, 128.4, 129.2, 129.8 (q,  $J = 309.8$  Hz), 130.0, 130.5, 130.9, 131.2, 135.6, 148.0;  $^{19}\text{F}$  NMR (378 MHz,  $\text{CDCl}_3$ )  $\delta$  -44.49 (s); HRMS (ESI) calcd for  $\text{C}_{17}\text{H}_{15}\text{F}_3\text{NS}$ : 322.0872 ( $\text{M} + \text{H}^+$ ), found: 322.0867.

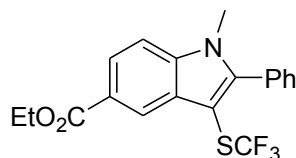

Ethyl 1-methyl-2-phenyl-3-(trifluoromethylthio)-1*H*-indole-5-carboxylate (**3e**)

Yellow solid;  $^1\text{H}$  NMR (400 MHz,  $\text{CDCl}_3$ )  $\delta$  1.42 (t,  $J = 7.0$  Hz, 3H), 3.64 (s, 3H), 4.41 (q,  $J = 7.0$  Hz, 2H), 7.37 (d,  $J = 8.6$  Hz, 1H), 7.41–7.50 (m, 5H), 8.03 (d,  $J = 8.5$  Hz, 1H), 8.57 (s, 1H);  $^{13}\text{C}$  NMR (100 MHz,  $\text{CDCl}_3$ )  $\delta$  14.4, 31.9, 60.9, 94.2, 109.8, 122.1, 124.1, 124.5, 128.5, 129.2, 129.5, 129.5 (q,  $J = 309.5$  Hz), 129.8, 130.7, 139.6, 149.6, 167.3;  $^{19}\text{F}$  NMR (378 MHz,  $\text{CDCl}_3$ )  $\delta$  -44.19 (s); HRMS (ESI) calcd for  $\text{C}_{19}\text{H}_{17}\text{F}_3\text{NO}_2\text{S}$ : 380.0927 ( $\text{M} + \text{H}^+$ ), found: 380.0934.

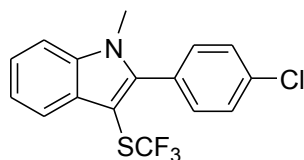

1,5-Dimethyl-2-phenyl-3-(trifluoromethylthio)-1*H*-indole (**3f**)

Yellow solid;  $^1\text{H}$  NMR (400 MHz,  $\text{CDCl}_3$ )  $\delta$  3.67 (s, 3H), 7.31–7.35 (m, 1H), 7.35–7.40 (m, 3H), 7.41–7.43 (m, 1H), 7.50–7.54 (m, 2H), 7.85 (d,  $J = 7.7$  Hz, 1H);  $^{13}\text{C}$  NMR (100 MHz,  $\text{CDCl}_3$ )  $\delta$  31.7, 93.1, 110.0, 119.6, 121.8, 123.4, 128.8, 129.6 (q,  $J = 309.6$  Hz), 130.1, 132.1, 132.5, 135.6, 137.2, 146.7;  $^{19}\text{F}$  NMR (378 MHz,  $\text{CDCl}_3$ )  $\delta$  -44.39 (s); HRMS (ESI) calcd for  $\text{C}_{16}\text{H}_{12}\text{ClF}_3\text{NS}$ : 342.0326 ( $\text{M} + \text{H}^+$ ), found:

342.0324.

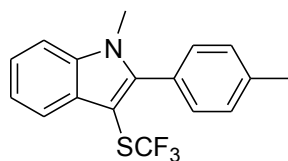

1-Methyl-2-p-tolyl-3-(trifluoromethylthio)-1*H*-indole (**3g**)

Yellow solid;  $^1\text{H}$  NMR (400 MHz,  $\text{CDCl}_3$ )  $\delta$  2.48 (s, 3H), 3.66 (s, 3H), 7.31–7.38 (m, 6H), 7.40–7.42 (m, 1H), 7.88 (d,  $J = 7.3$  Hz, 1H);  $^{13}\text{C}$  NMR (100 MHz,  $\text{CDCl}_3$ )  $\delta$  21.5, 31.6, 92.5, 110.0, 119.5, 121.6, 123.1, 126.8, 129.2, 129.8 (q,  $J = 309.5$  Hz), 130.3, 130.7, 137.2, 139.3, 148.3;  $^{19}\text{F}$  NMR (378 MHz,  $\text{CDCl}_3$ )  $\delta$  -44.35 (s); HRMS (ESI) calcd for  $\text{C}_{17}\text{H}_{15}\text{F}_3\text{NS}$ : 322.0872 ( $\text{M} + \text{H}^+$ ), found: 322.0885.

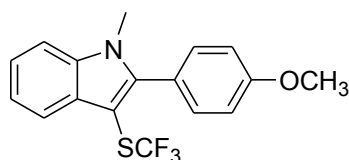

2-(4-Methoxyphenyl)-1-methyl-3-(trifluoromethylthio)-1*H*-indole (**3h**)

Yellow solid;  $^1\text{H}$  NMR (400 MHz,  $\text{CDCl}_3$ )  $\delta$  3.64 (s, 3H), 3.87 (s, 3H), 7.02–7.04 (m, 2H), 7.27–7.39 (m, 5H), 7.82 (d,  $J = 7.5$  Hz, 1H);  $^{13}\text{C}$  NMR (100 MHz,  $\text{CDCl}_3$ )  $\delta$  31.6, 55.3, 92.4, 109.9, 113.9, 119.5, 121.6, 123.0, 129.7 (q,  $J = 309.6$  Hz), 130.2, 130.6, 132.1, 137.1, 148.1, 160.3;  $^{19}\text{F}$  NMR (378 MHz,  $\text{CDCl}_3$ )  $\delta$  -44.43 (s); HRMS (ESI) calcd for  $\text{C}_{17}\text{H}_{15}\text{F}_3\text{NOS}$ : 338.0821 ( $\text{M} + \text{H}^+$ ), found: 338.0816.

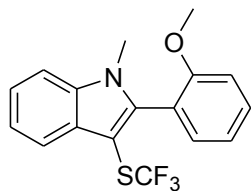

2-(2-Methoxyphenyl)-1-methyl-3-(trifluoromethylthio)-1*H*-indole (**3i**)

Brown solid;  $^1\text{H}$  NMR (400 MHz,  $\text{CDCl}_3$ )  $\delta$  3.59 (s, 3H), 3.77 (s, 3H), 7.05 (d,  $J = 8.4$  Hz, 1H), 7.12 (t,  $J = 7.4$  Hz, 1H), 7.28–7.36 (m, 3H), 7.42 (d,  $J = 7.9$  Hz, 1H), 7.49–7.54 (m, 1H), 7.85 (d,  $J = 7.6$  Hz, 1H);  $^{13}\text{C}$  NMR (100 MHz,  $\text{CDCl}_3$ )  $\delta$  31.2, 55.5, 92.7, 109.9, 111.0, 119.5, 120.5, 121.3, 122.8, 124.8, 129.7 (q,  $J = 309.4$  Hz),

130.3, 131.3, 133.0, 137.1, 145.6, 158.1;  $^{19}\text{F}$  NMR (378 MHz,  $\text{CDCl}_3$ )  $\delta$  -44.48 (s); HRMS (ESI) calcd for  $\text{C}_{17}\text{H}_{15}\text{F}_3\text{NOS}$ : 338.0821 ( $\text{M} + \text{H}^+$ ), found: 338.0796..

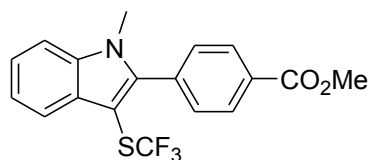

Methyl 4-(1-methyl-3-(trifluoromethylthio)-1*H*-indol-2-yl)benzoate (**3j**)

Yellow solid;  $^1\text{H}$  NMR (400 MHz,  $\text{CDCl}_3$ )  $\delta$  3.66 (s, 3H), 3.96 (s, 3H), 7.30–7.42 (m, 3H), 7.52 (d,  $J$  = 8.0 Hz, 2H), 7.85 (d,  $J$  = 7.5 Hz, 1H), 8.19 (d,  $J$  = 8.0 Hz, 2H);  $^{13}\text{C}$  NMR (100 MHz,  $\text{CDCl}_3$ )  $\delta$  31.8, 52.4, 93.3, 110.1, 119.7, 121.9, 123.6, 129.5 (q,  $J$  = 309.5 Hz), 129.6, 130.1, 130.8, 130.9, 143.3, 137.3, 148.2, 166.6;  $^{19}\text{F}$  NMR (378 MHz,  $\text{CDCl}_3$ )  $\delta$  -44.33 (s); HRMS (ESI) calcd for  $\text{C}_{18}\text{H}_{15}\text{F}_3\text{NO}_2\text{S}$ : 366.0770 ( $\text{M} + \text{H}^+$ ), found: 366.0765.

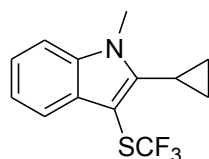

2-Cyclopropyl-1-methyl-3-(trifluoromethylthio)-1*H*-indole (**3k**)

Yellow oil;  $^1\text{H}$  NMR (400 MHz,  $\text{CDCl}_3$ )  $\delta$  1.01–1.05 (m, 2H), 1.13–1.18 (m, 2H), 1.82–1.89 (m, 1H), 3.84 (s, 3H), 7.20–7.31 (m, 3H), 7.73 (d,  $J$  = 7.6 Hz, 1H);  $^{13}\text{C}$  NMR (100 MHz,  $\text{CDCl}_3$ )  $\delta$  6.4, 6.8, 30.4, 92.0, 109.2, 119.0, 121.1, 122.6, 129.8 (q,  $J$  = 309.1 Hz), 130.2, 136.6, 147.4;  $^{19}\text{F}$  NMR (378 MHz,  $\text{CDCl}_3$ )  $\delta$  -44.68 (s); HRMS (ESI) calcd for  $\text{C}_{13}\text{H}_{13}\text{F}_3\text{NS}$ : 272.0715 ( $\text{M} + \text{H}^+$ ), found: 272.0718.

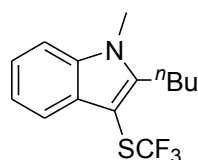

2-*n*-Butyl-1-methyl-3-(trifluoromethylthio)-1*H*-indole (**3l**)

Yellow oil;  $^1\text{H}$  NMR (400 MHz,  $\text{CDCl}_3$ )  $\delta$  0.96 (t,  $J$  = 7.2 Hz, 3H), 1.39–1.48 (m, 2H), 1.55–1.61 (m, 2H), 2.97 (t,  $J$  = 8.0 Hz, 2H), 3.73 (s, 3H), 7.19–7.26 (m, 2H), 7.29–7.31 (m, 1H), 7.70–7.72 (m, 1H);  $^{13}\text{C}$  NMR (100 MHz,  $\text{CDCl}_3$ )  $\delta$  13.8, 22.7,

24.6, 31.6, 90.9, 109.3, 118.9, 121.2, 122.3, 129.7 (q,  $J = 309.5$  Hz), 130.2, 137.0, 149.2;  $^{19}\text{F}$  NMR (378 MHz,  $\text{CDCl}_3$ )  $\delta$  -44.99 (s); HRMS (ESI) calcd for  $\text{C}_{14}\text{H}_{17}\text{F}_3\text{NS}$ : 288.1028 ( $\text{M} + \text{H}^+$ ), found: 288.1033.

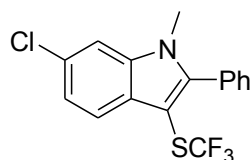

6-Chloro-1-methyl-2-phenyl-3-(trifluoromethylthio)-1*H*-indole (**3n**)

Colorless oil;  $^1\text{H}$  NMR (400 MHz,  $\text{CDCl}_3$ )  $\delta$  3.63 (s, 3H), 7.27 (dd,  $J_1 = 8.5$  Hz,  $J_2 = 1.8$  Hz, 1H), 7.41–7.43 (m, 3H), 7.52–7.54 (m, 3H), 7.74 (d,  $J = 8.4$  Hz, 1H);  $^{13}\text{C}$  NMR (100 MHz,  $\text{CDCl}_3$ )  $\delta$  31.7, 93.1, 110.1, 120.6, 122.3, 128.5, 128.7, 129.1, 129.4, 129.5 (q,  $J = 309.7$  Hz), 130.7, 137.5, 148.7;  $^{19}\text{F}$  NMR (378 MHz,  $\text{CDCl}_3$ )  $\delta$  -44.34 (s); HRMS (ESI) calcd for  $\text{C}_{16}\text{H}_{13}\text{ClF}_3\text{NS}$ : 342.0326 ( $\text{M} + \text{H}^+$ ), found: 342.0357.

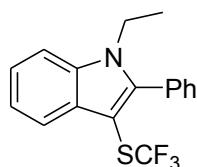

1-Ethyl-2-phenyl-3-(trifluoromethylthio)-1*H*-indole (**3o**)

White solid;  $^1\text{H}$  NMR (400 MHz,  $\text{CDCl}_3$ )  $\delta$  1.29 (t,  $J = 7.2$  Hz, 3H), 4.10 (q,  $J = 7.2$  Hz, 2H), 7.28–7.36 (m, 2H), 7.40–7.44 (m, 3H), 7.50–7.53 (m, 3H), 7.86 (d,  $J = 7.8$  Hz, 1H);  $^{13}\text{C}$  NMR (100 MHz,  $\text{CDCl}_3$ )  $\delta$  15.3, 39.6, 93.0, 119.7, 121.5, 123.0, 128.4, 129.2, 129.6 (q,  $J = 309.6$  Hz), 130.1, 130.4, 130.7, 135.9, 147.7;  $^{19}\text{F}$  NMR (378 MHz,  $\text{CDCl}_3$ )  $\delta$  -44.43 (s); HRMS (ESI) calcd for  $\text{C}_{17}\text{H}_{15}\text{F}_3\text{NS}$ : 322.0872 ( $\text{M} + \text{H}^+$ ), found: 322.0891.

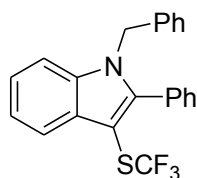

1-Benzyl-2-phenyl-3-(trifluoromethylthio)-1*H*-indole (**3p**)

White solid;  $^1\text{H}$  NMR (400 MHz,  $\text{CDCl}_3$ )  $\delta$  5.28 (s, 2H), 6.91–6.93 (m, 2H),

7.22–7.27 (m, 5H), 7.28–7.32 (m, 1H), 7.35–7.37 (m, 2H), 7.41–7.47 (m, 3H), 7.88 (d,  $J = 7.8$  Hz, 1H)  $^{13}\text{C}$  NMR (100 MHz,  $\text{CDCl}_3$ )  $\delta$  48.4, 110.9, 119.7, 121.8, 123.3, 126.0, 127.5, 128.3, 128.5, 128.8, 128.9 (q,  $J = 306.1$  Hz), 129.3, 129.7, 130.4, 130.7, 137.0, 148.3;  $^{19}\text{F}$  NMR (378 MHz,  $\text{CDCl}_3$ )  $\delta$  -44.24 (s); HRMS (ESI) calcd for  $\text{C}_{22}\text{H}_{17}\text{F}_3\text{NS}$ : 384.1028 ( $\text{M} + \text{H}^+$ ), found: 384.1016.

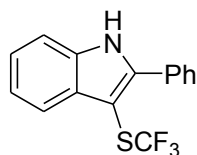

2-Phenyl-3-(trifluoromethylthio)-1*H*-indole (**3q**)

White solid;  $^1\text{H}$  NMR (400 MHz,  $\text{CDCl}_3$ )  $\delta$  7.29–7.33 (m, 2H), 7.40–7.42 (m, 1H), 7.45–7.53 (m, 3H), 7.75–7.77 (m, 2H), 7.85–7.87 (m, 1H), 8.58 (b, 1H);  $^{13}\text{C}$  NMR (100 MHz,  $\text{CDCl}_3$ )  $\delta$  92.4, 111.3, 119.8, 121.8, 123.7, 128.7, 128.9, 129.3, 129.8 (q,  $J = 309.8$  Hz), 130.7, 131.5, 135.3, 144.4;  $^{19}\text{F}$  NMR (378 MHz,  $\text{CDCl}_3$ )  $\delta$  -43.82 (s).



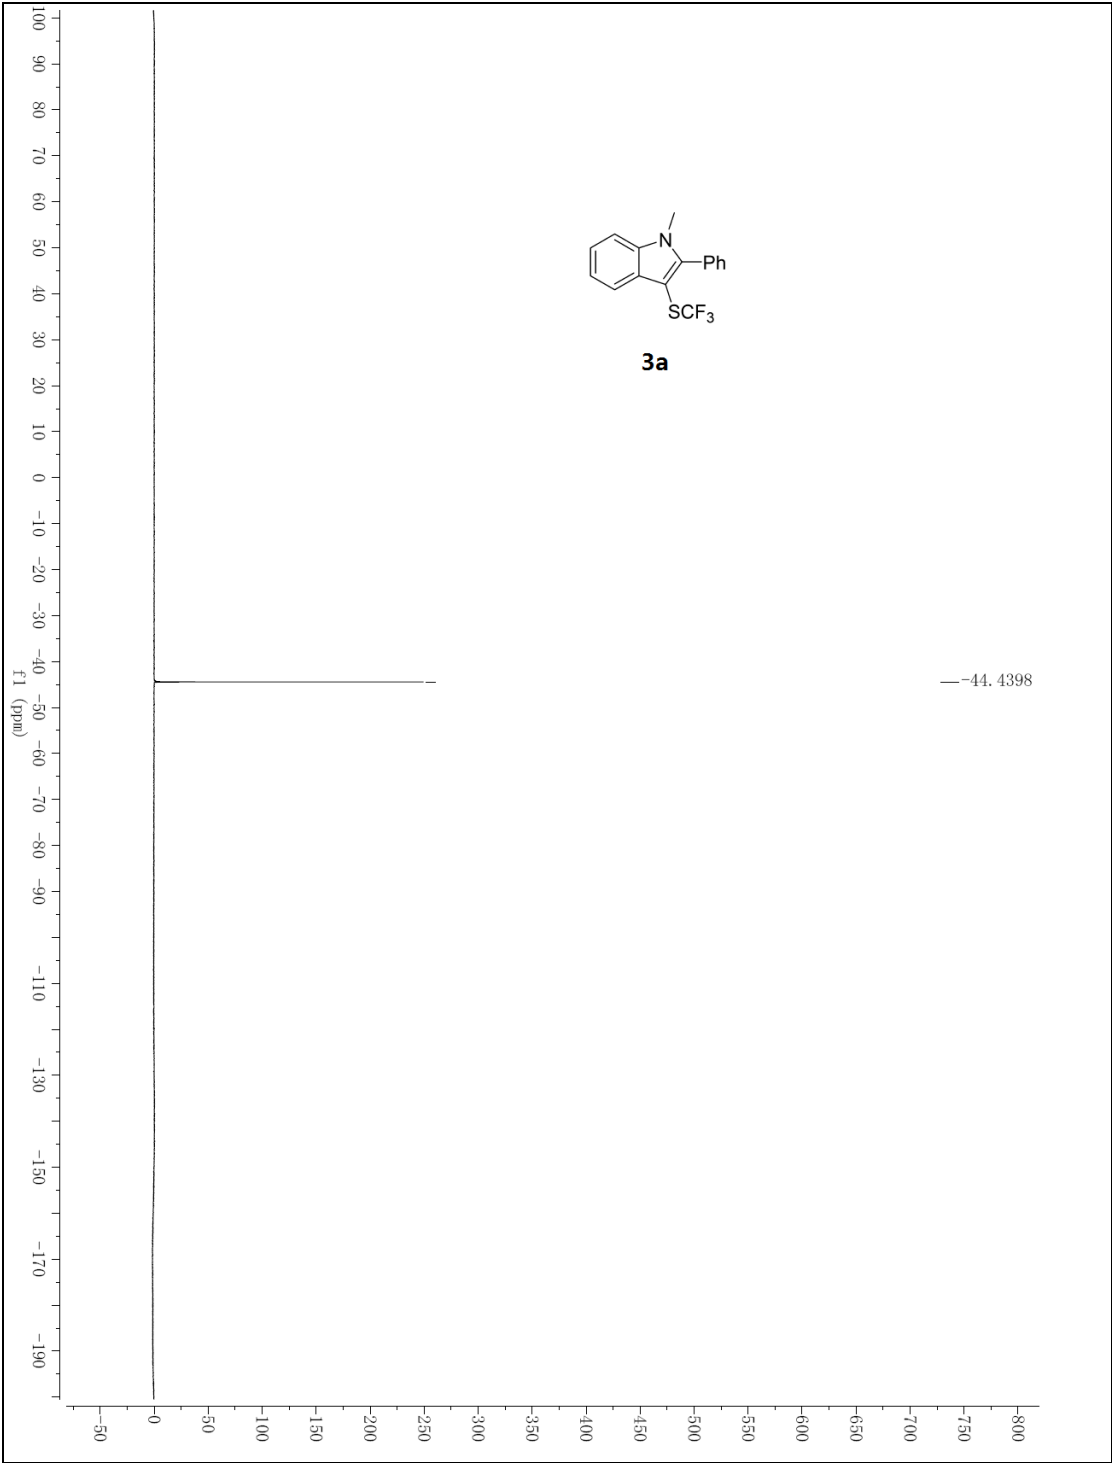

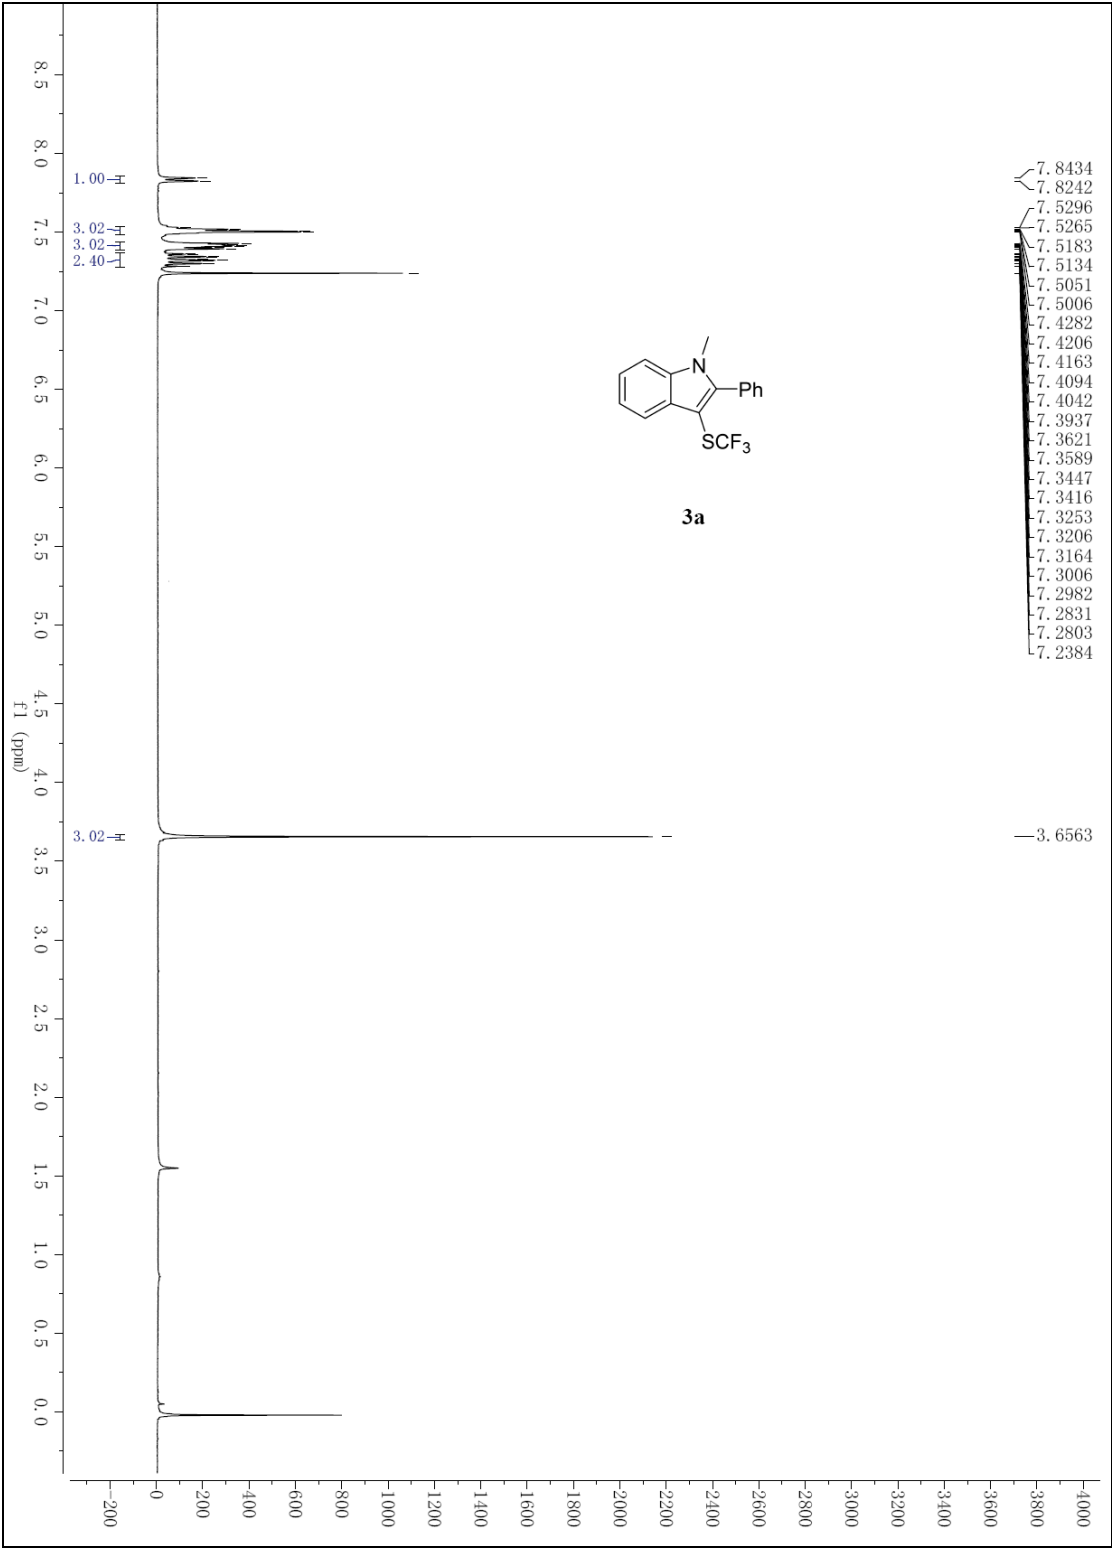

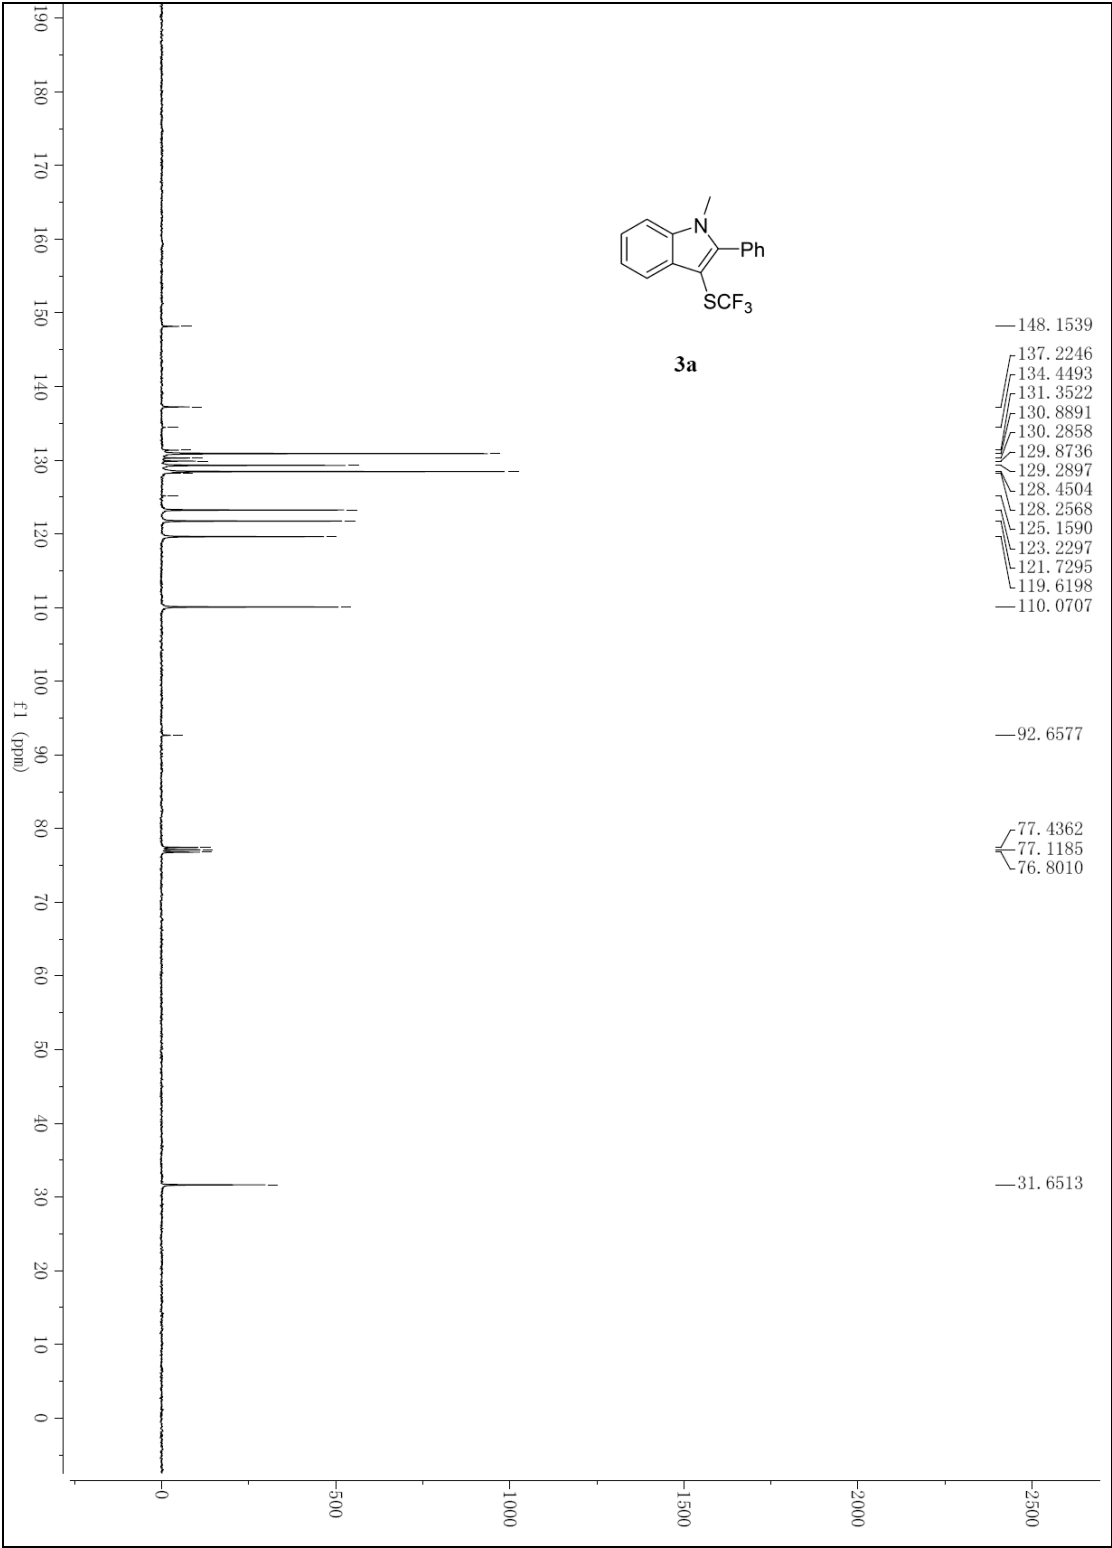



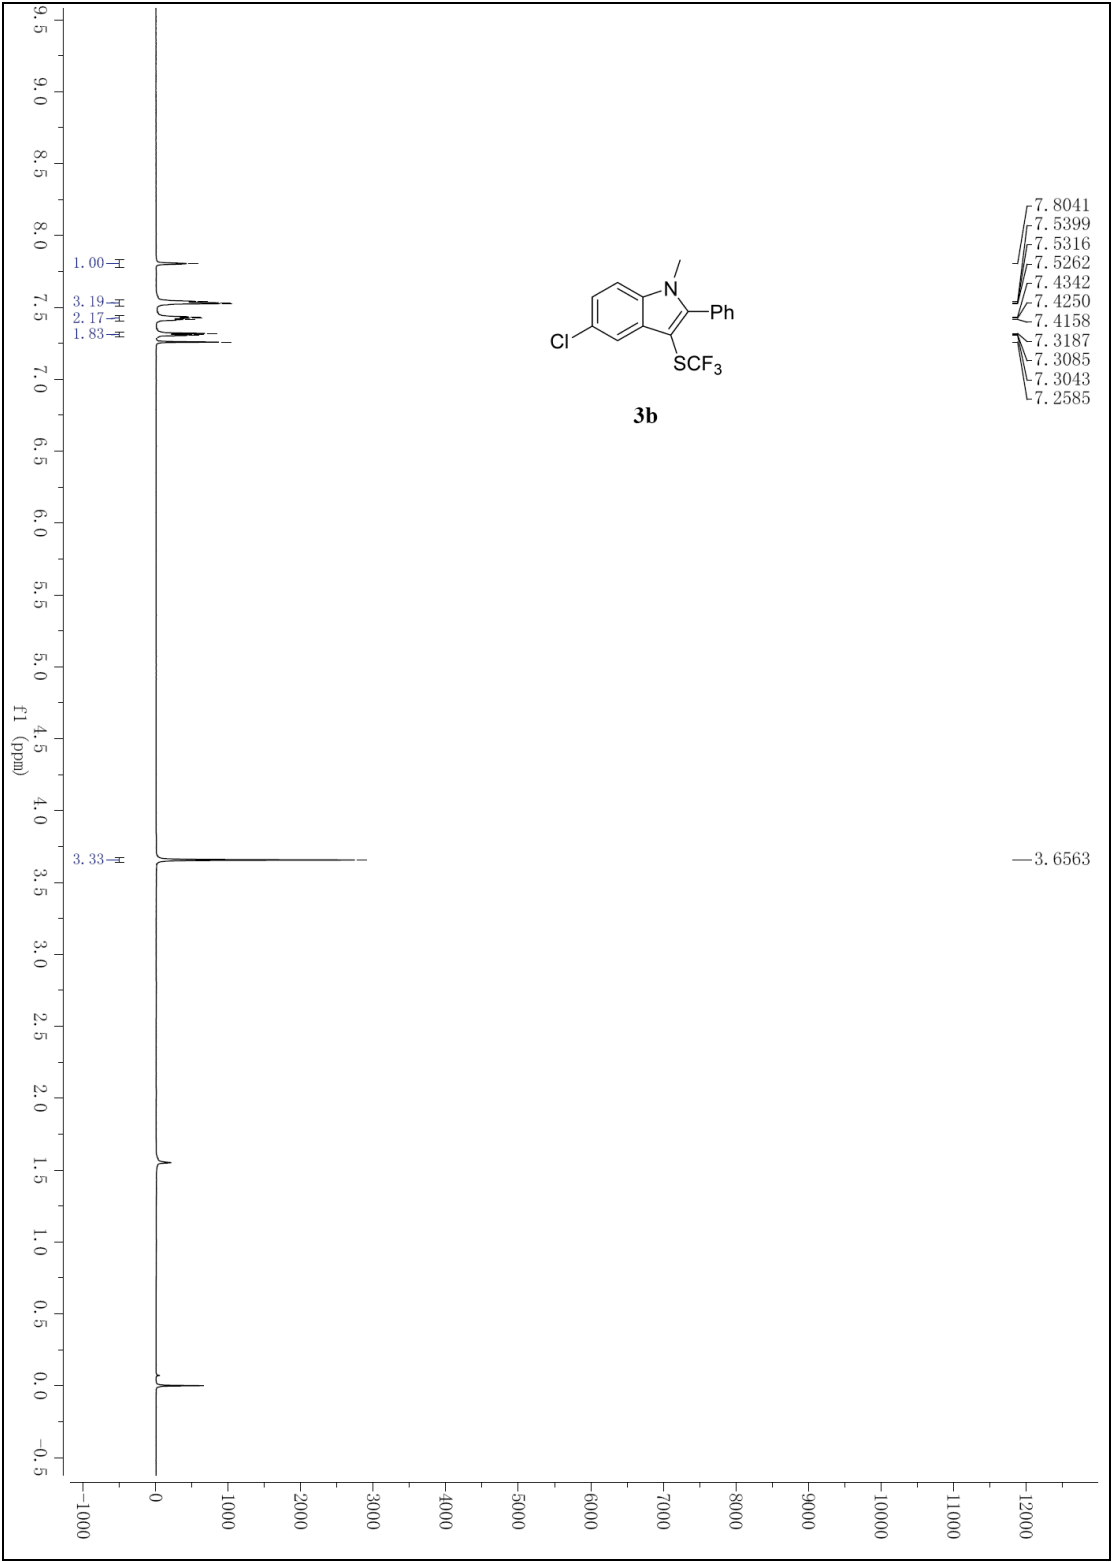

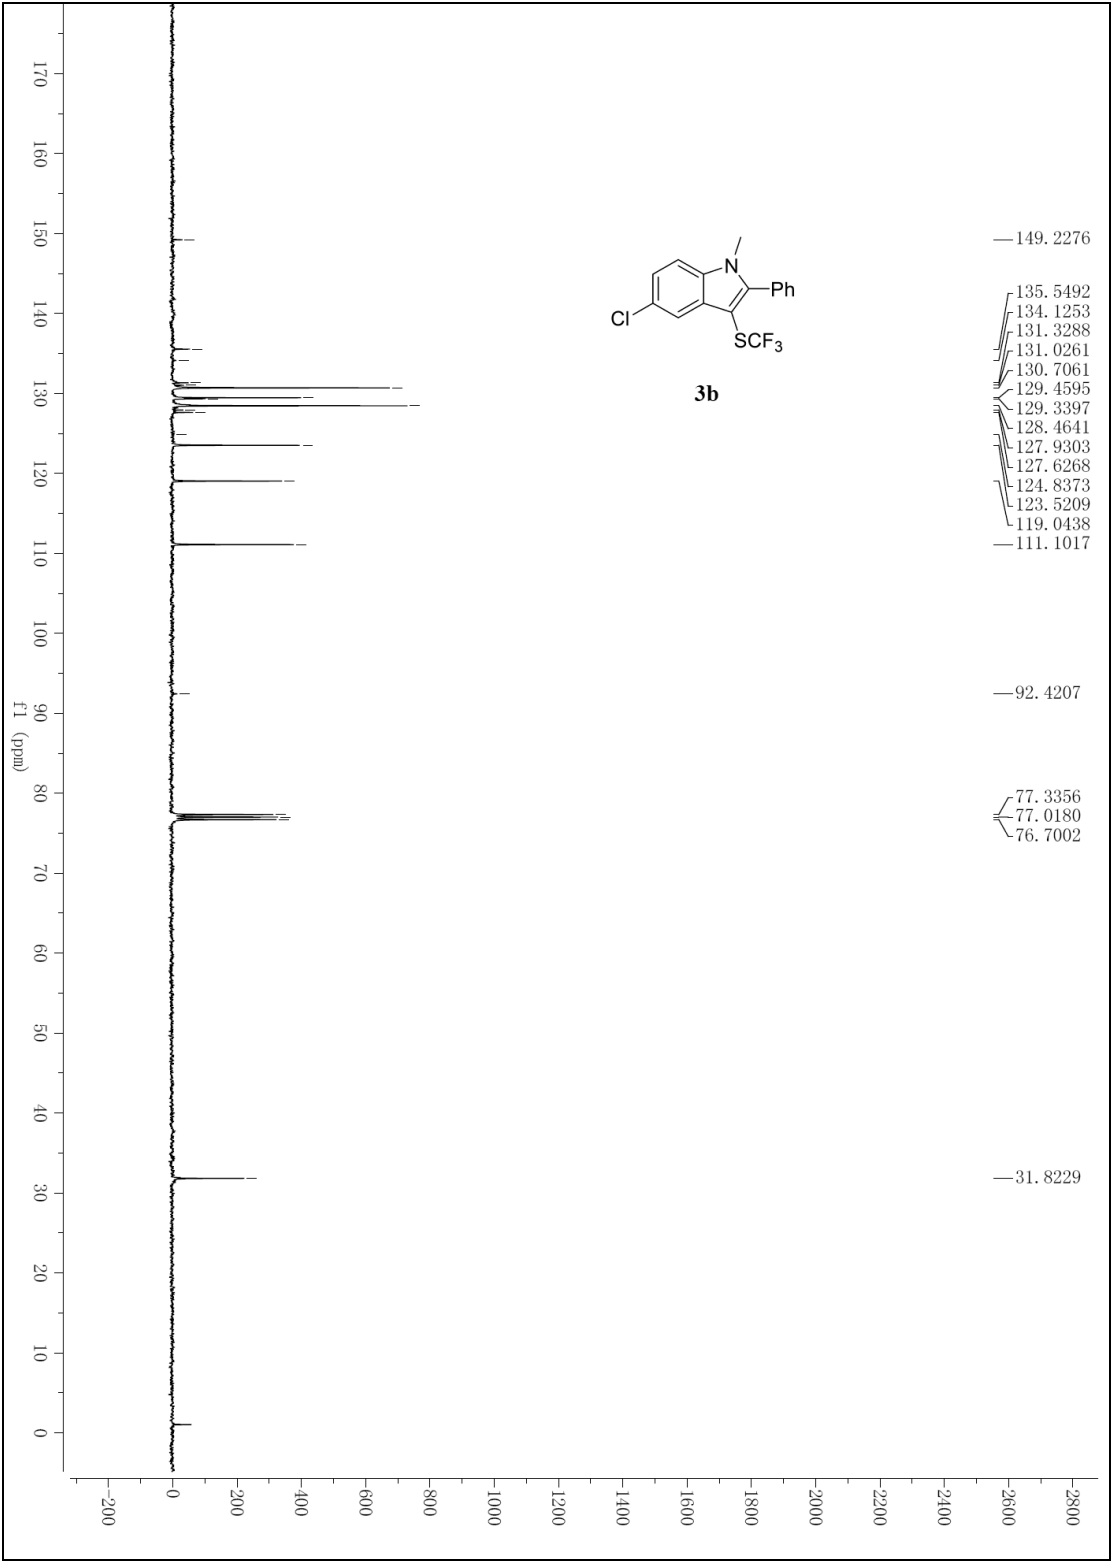

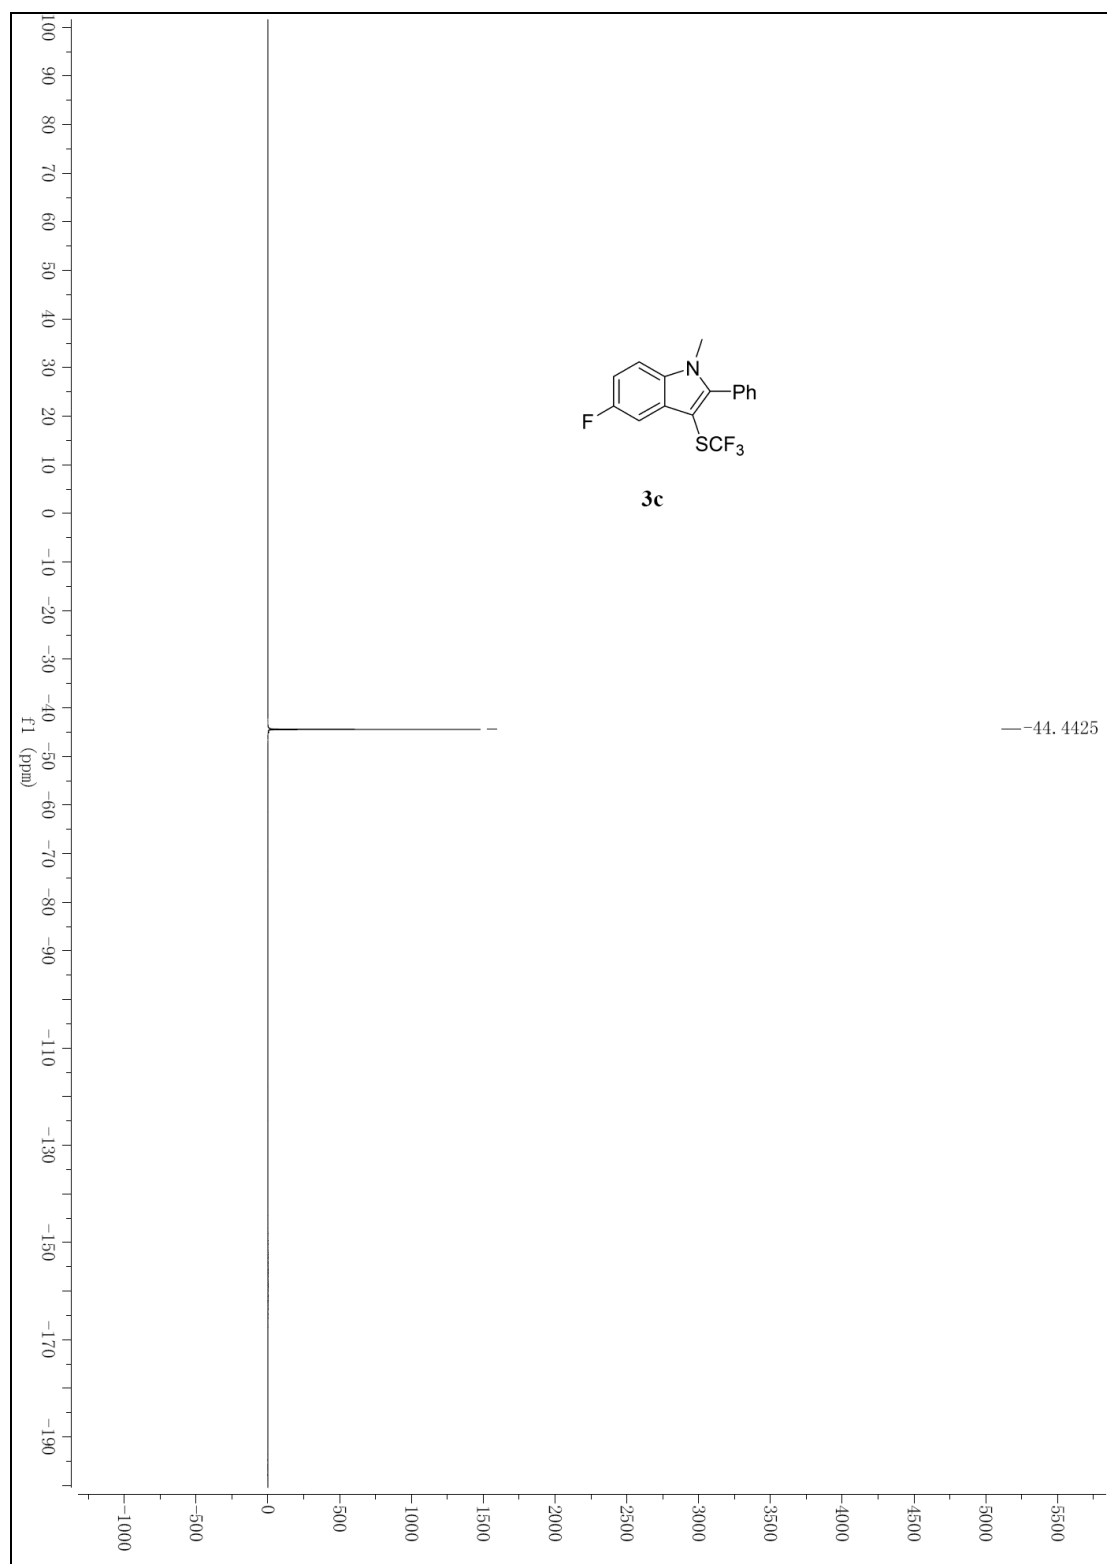

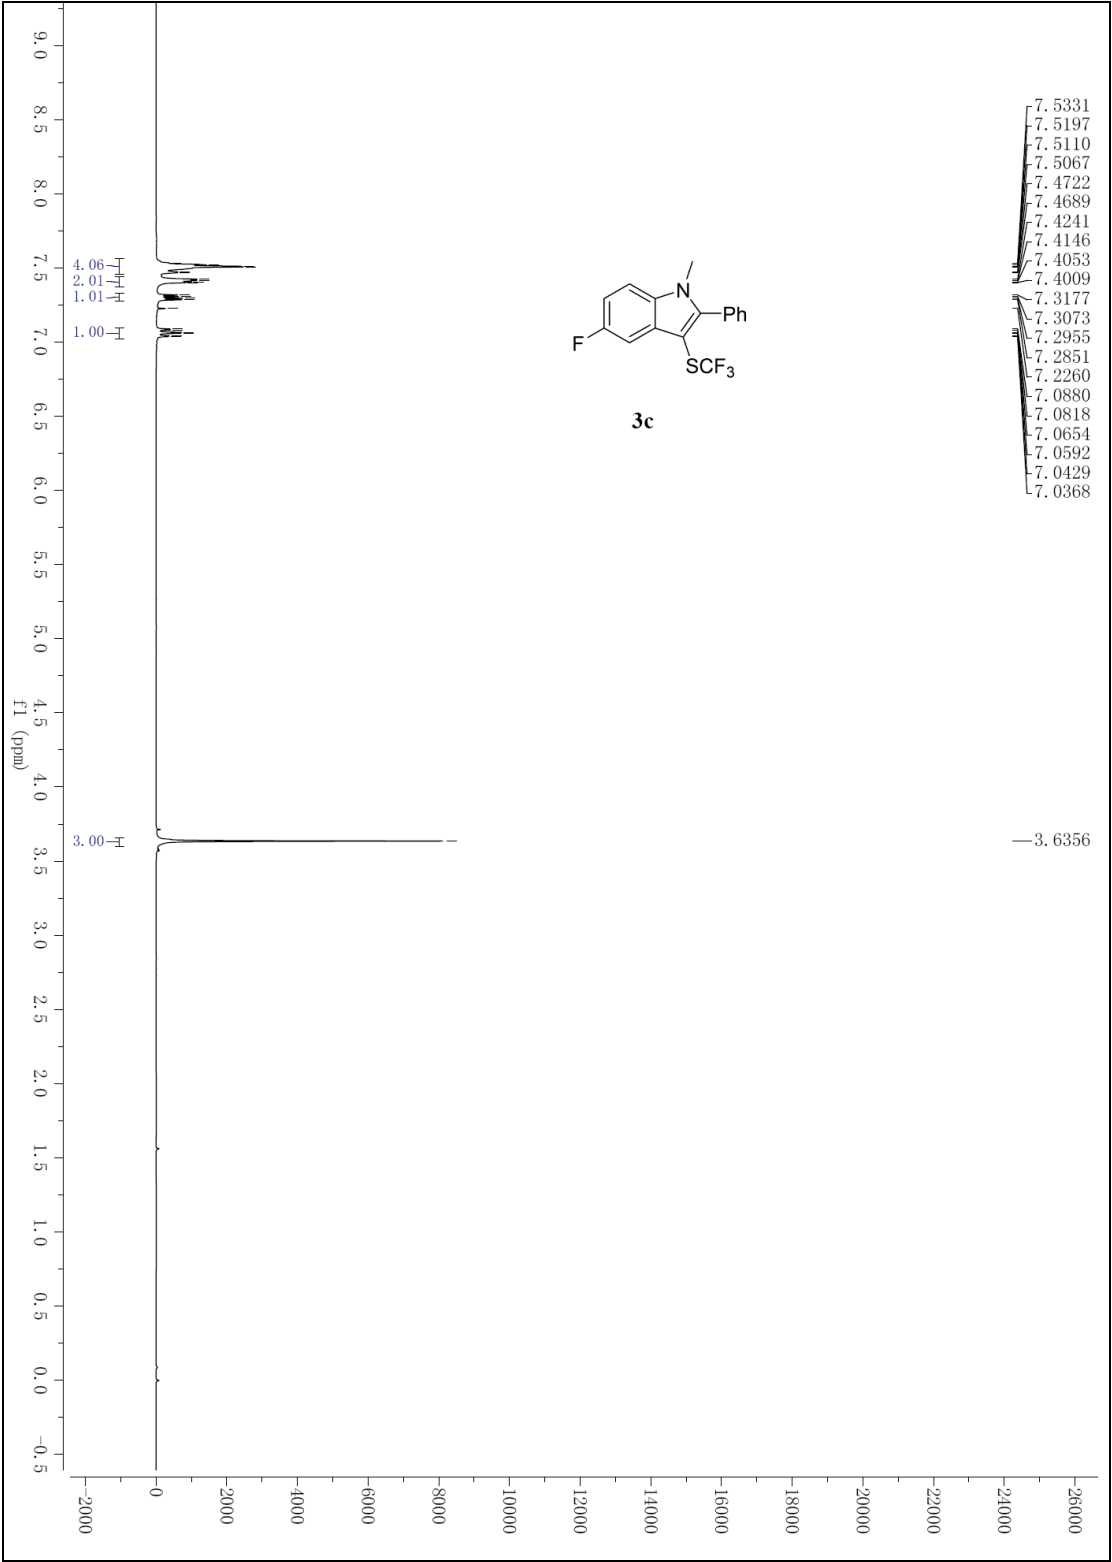



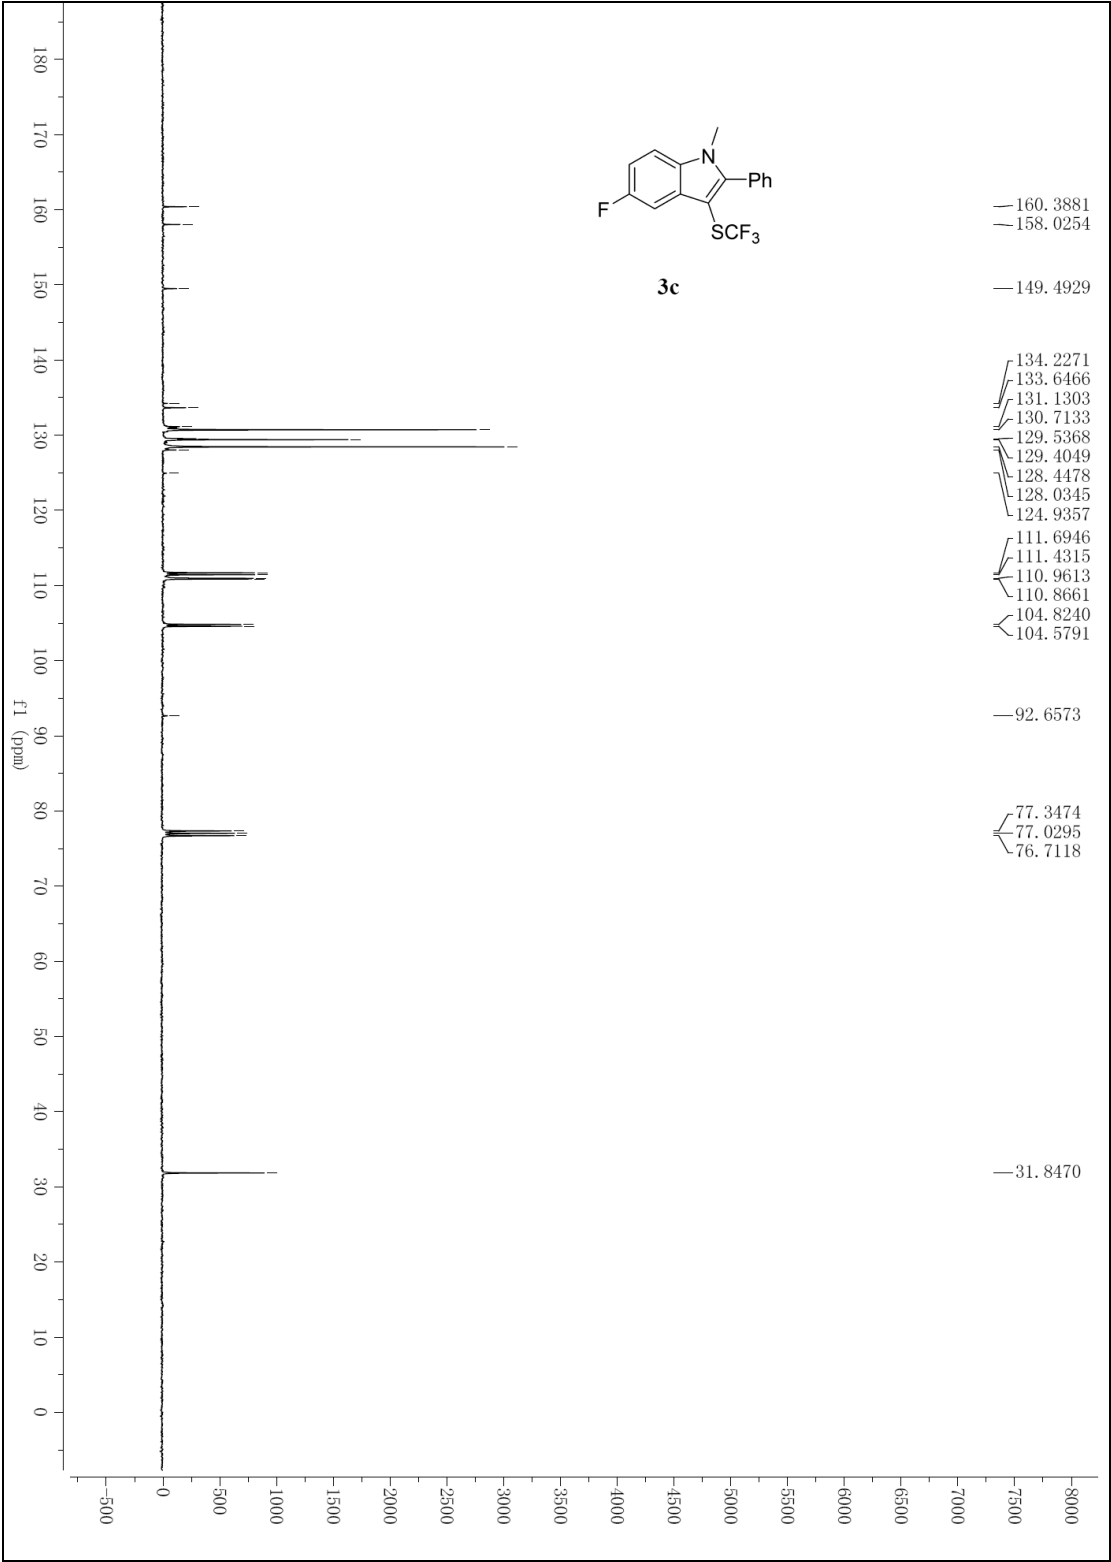

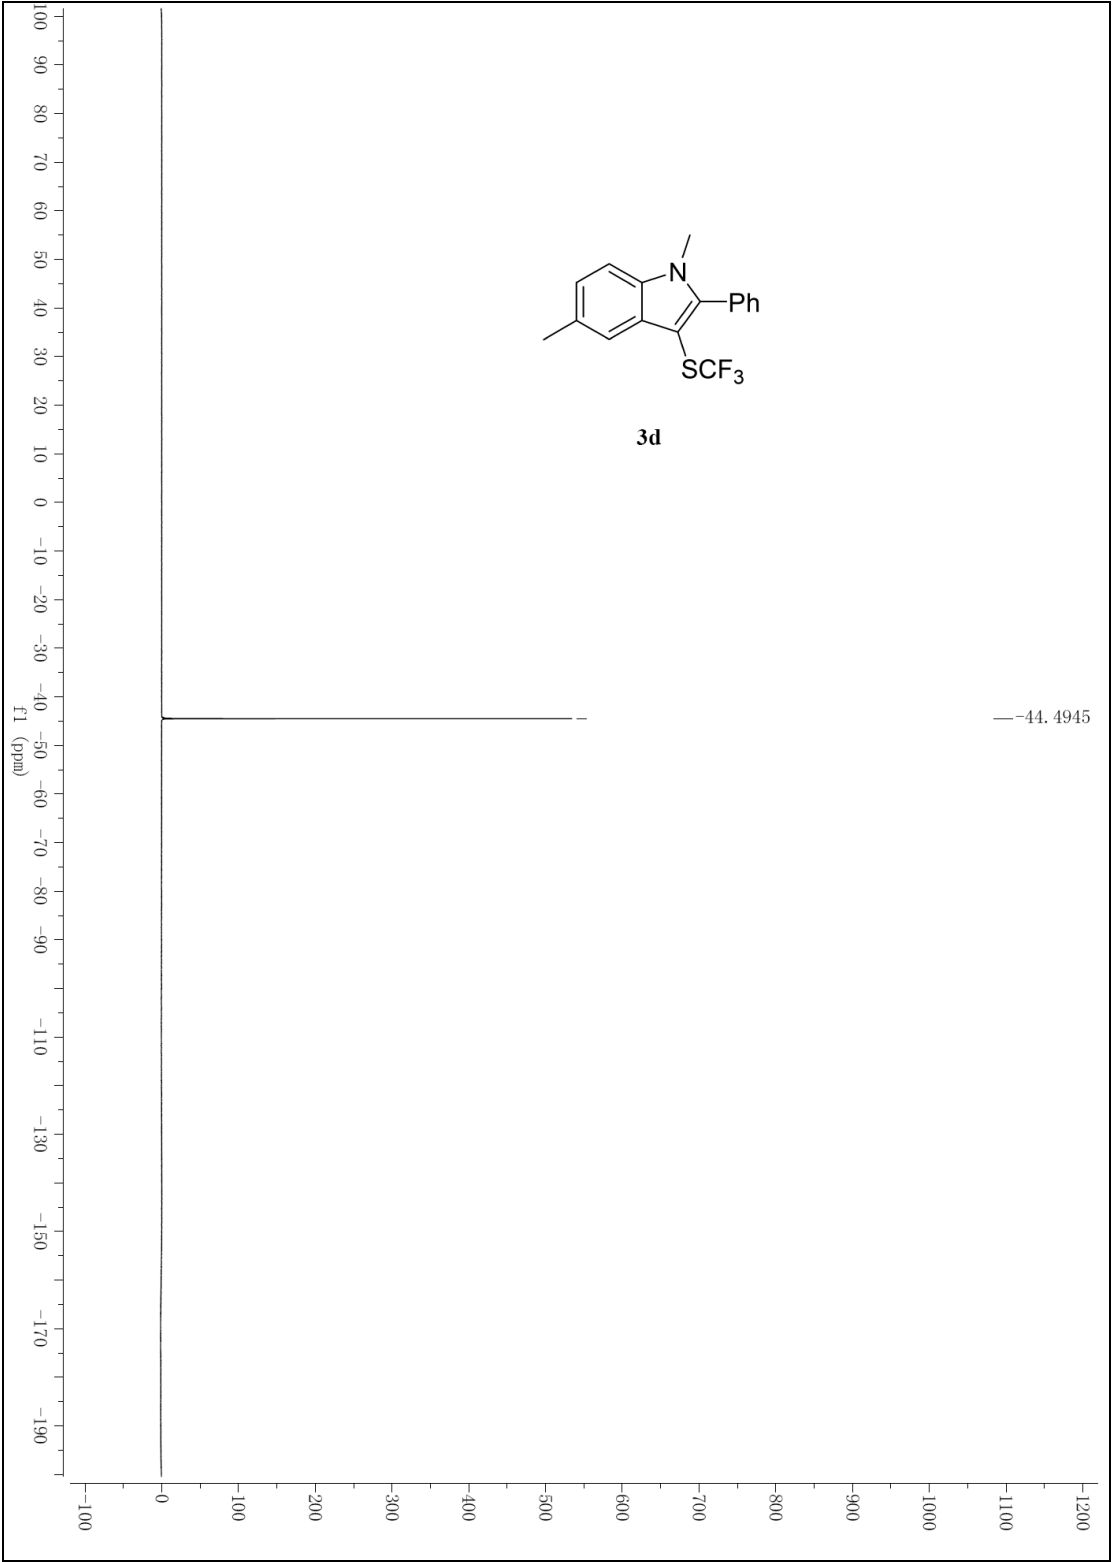

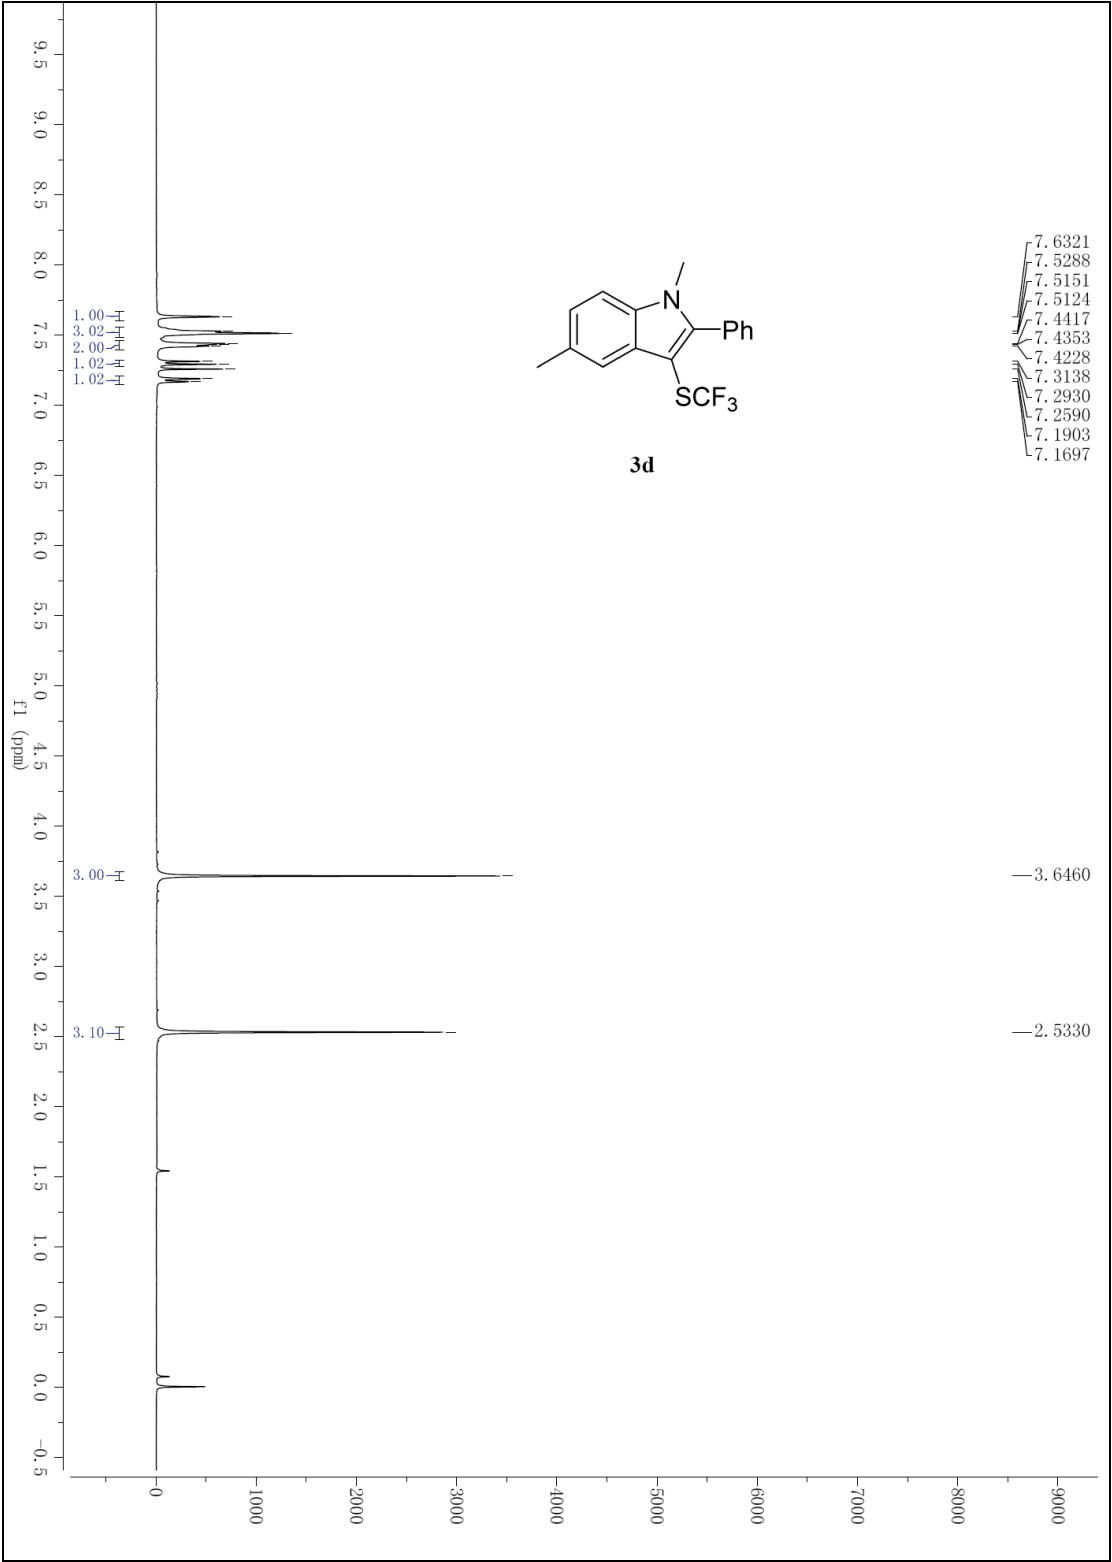

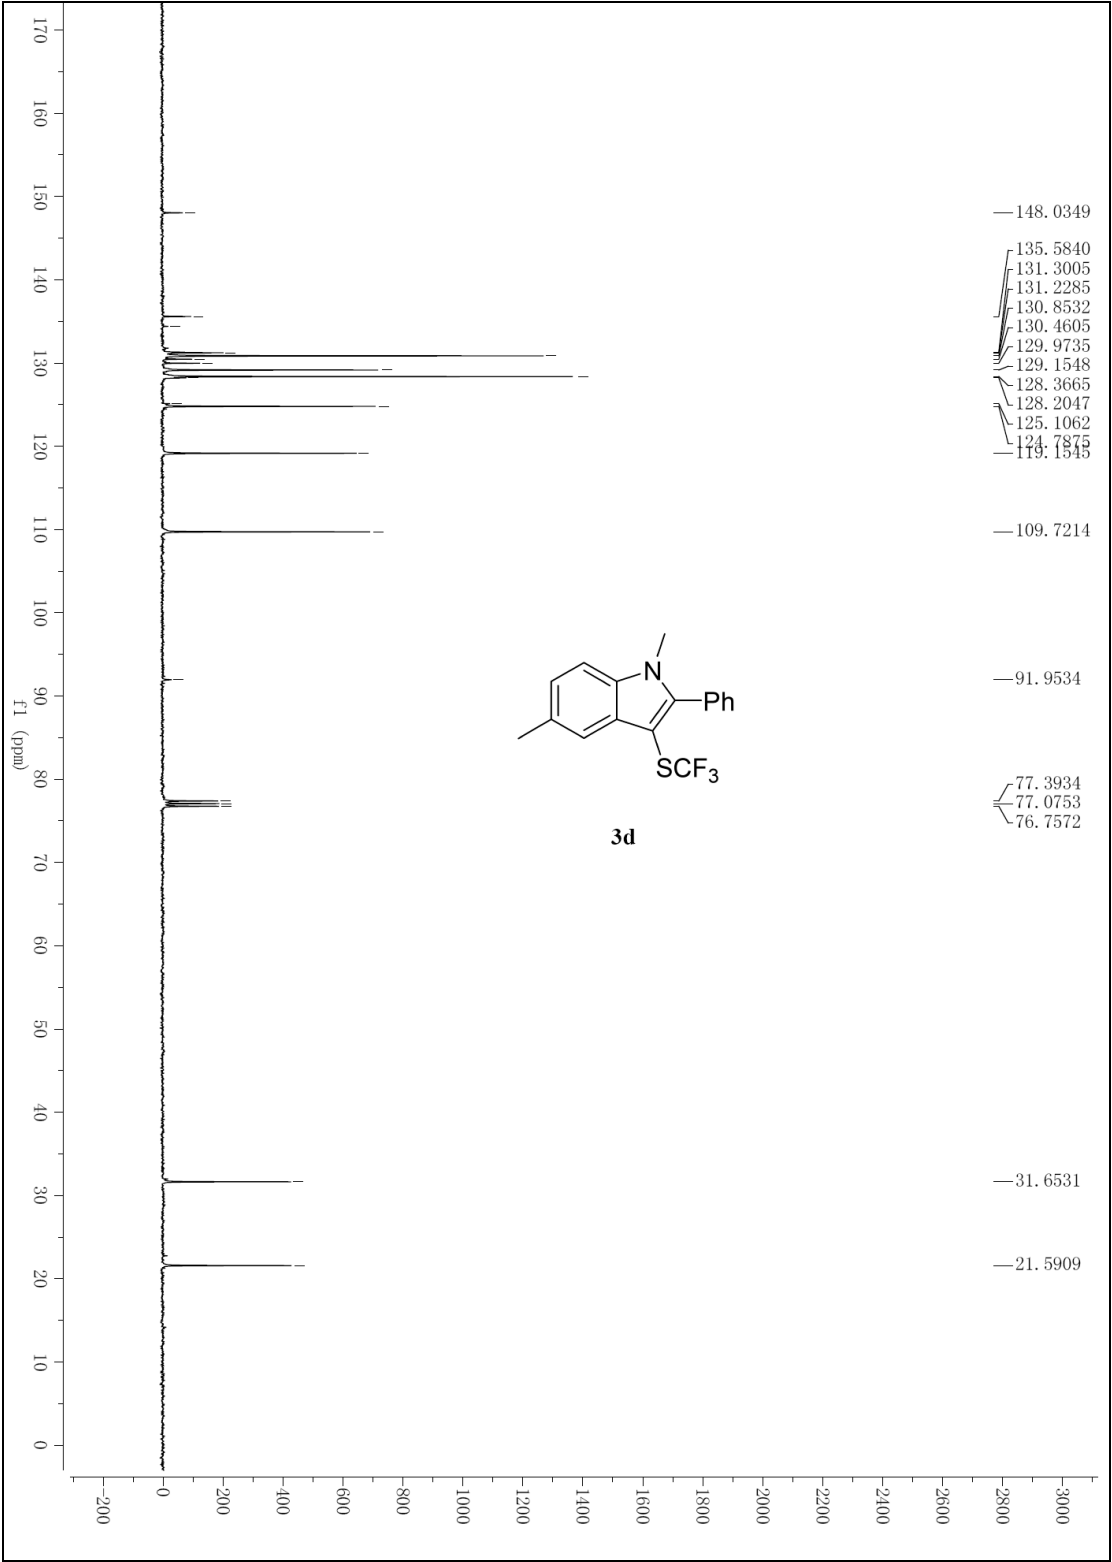

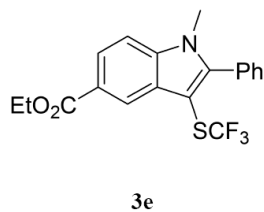

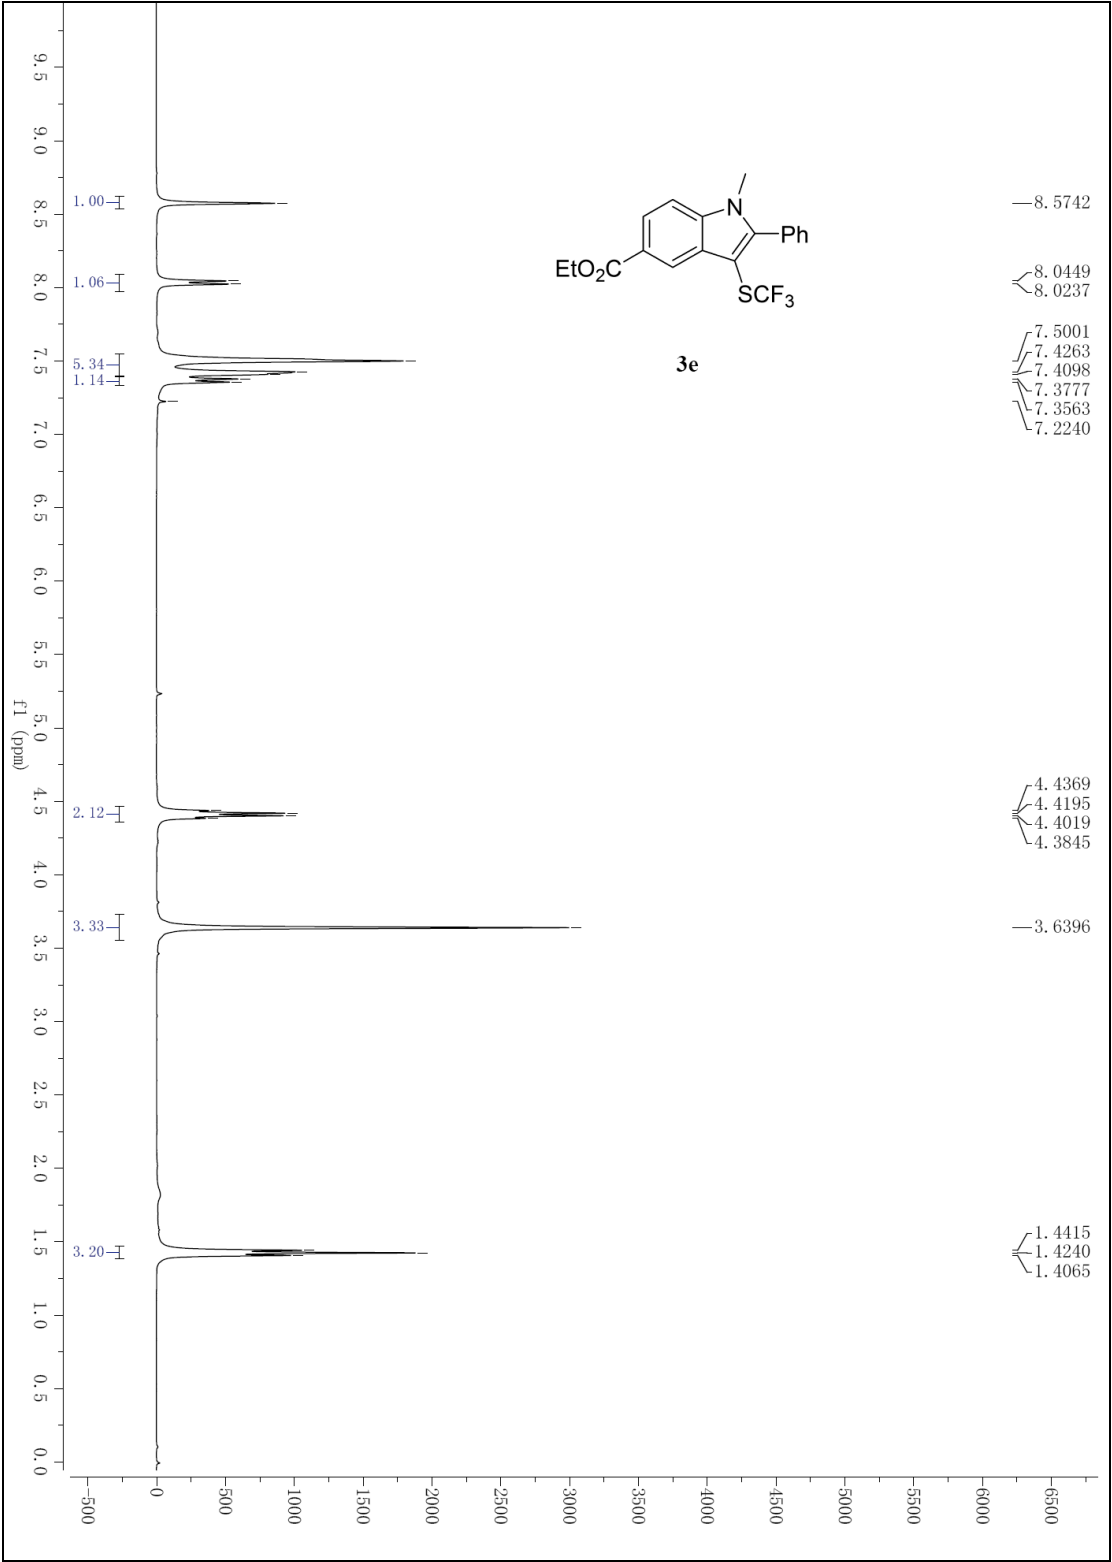

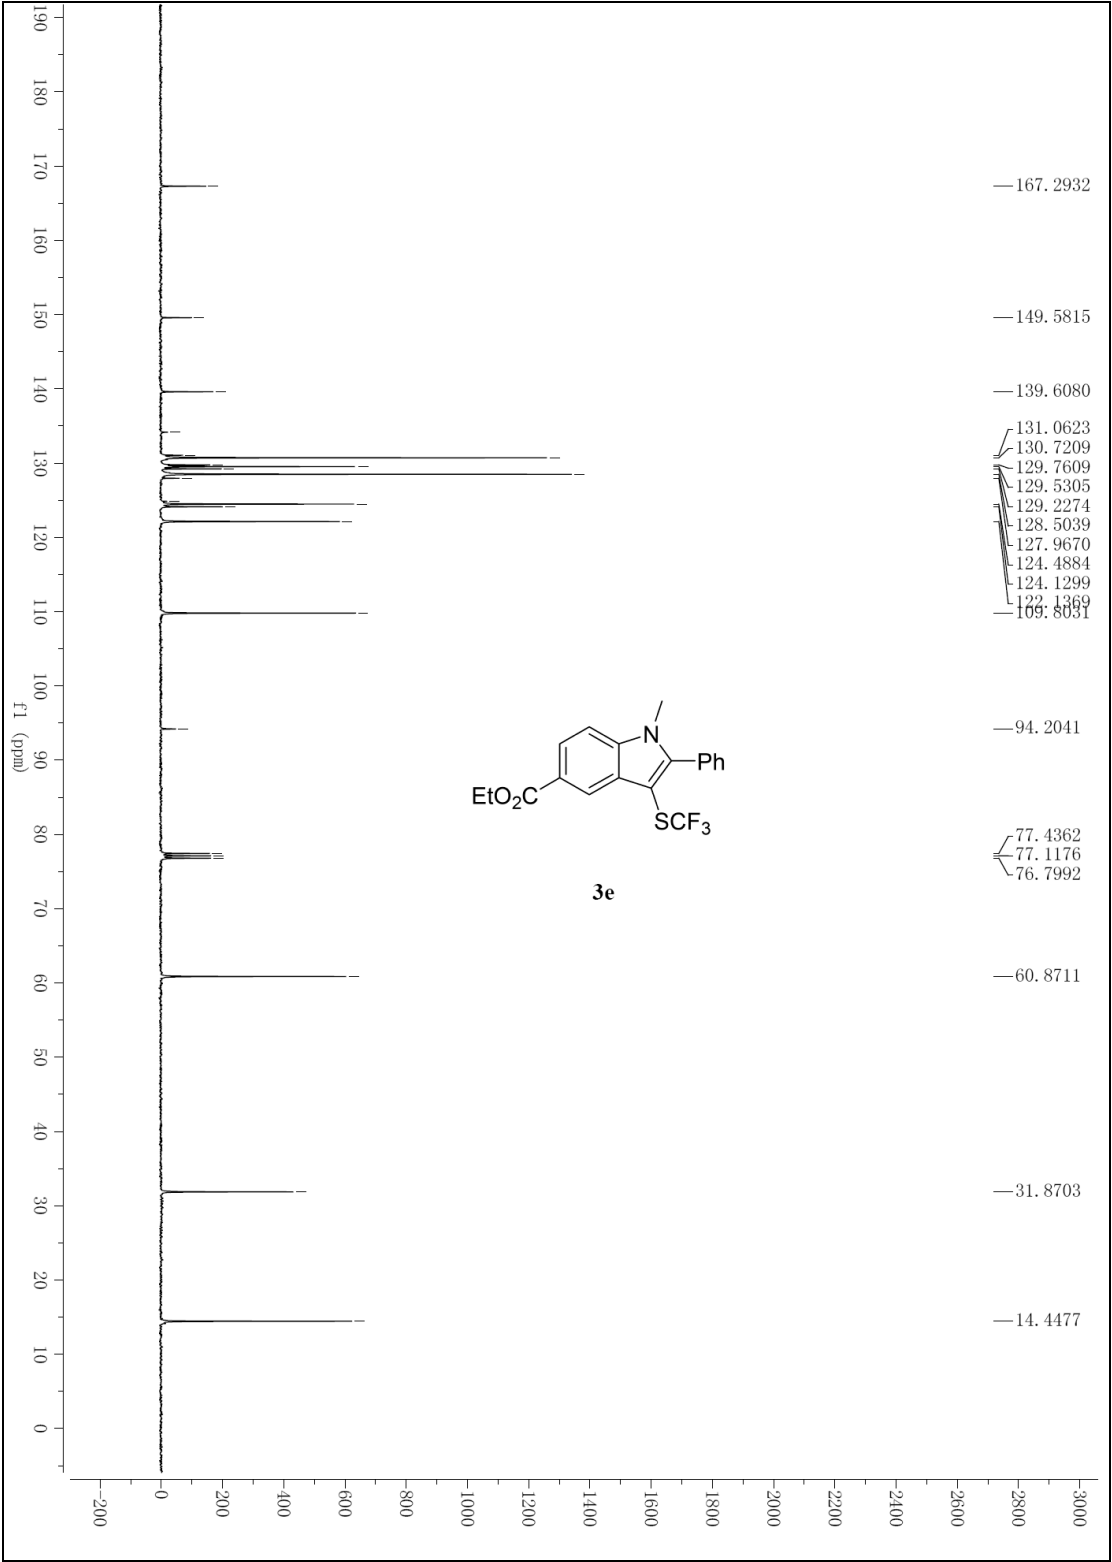

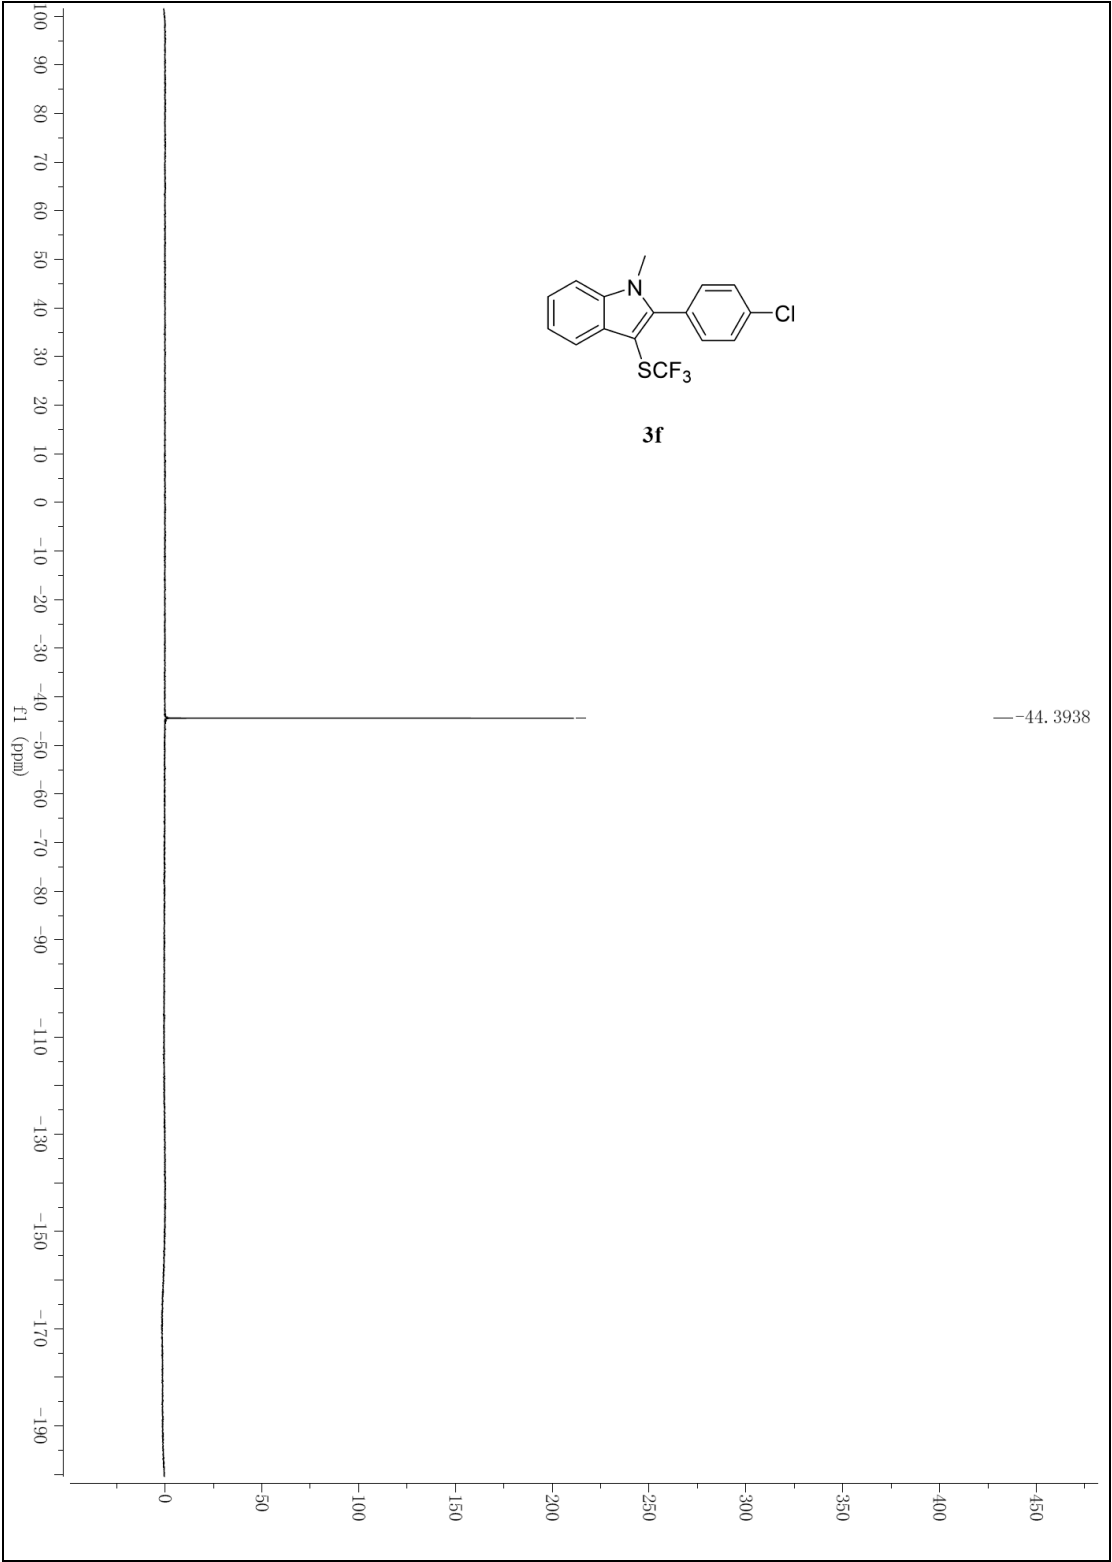



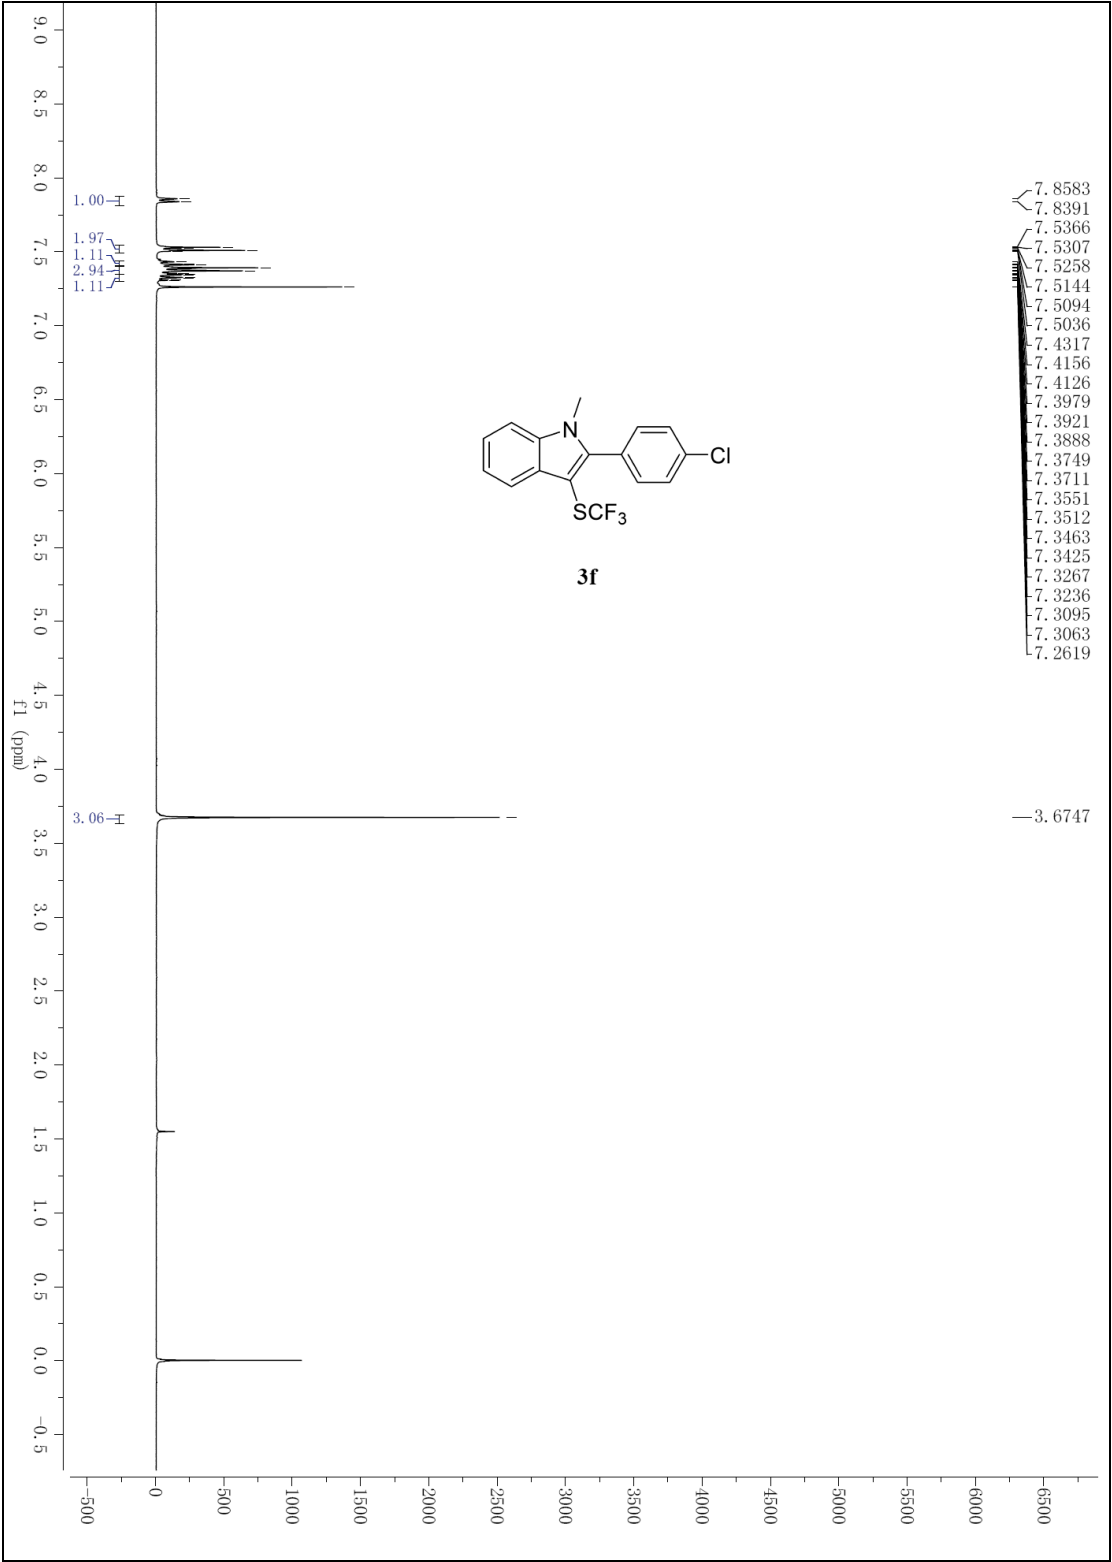

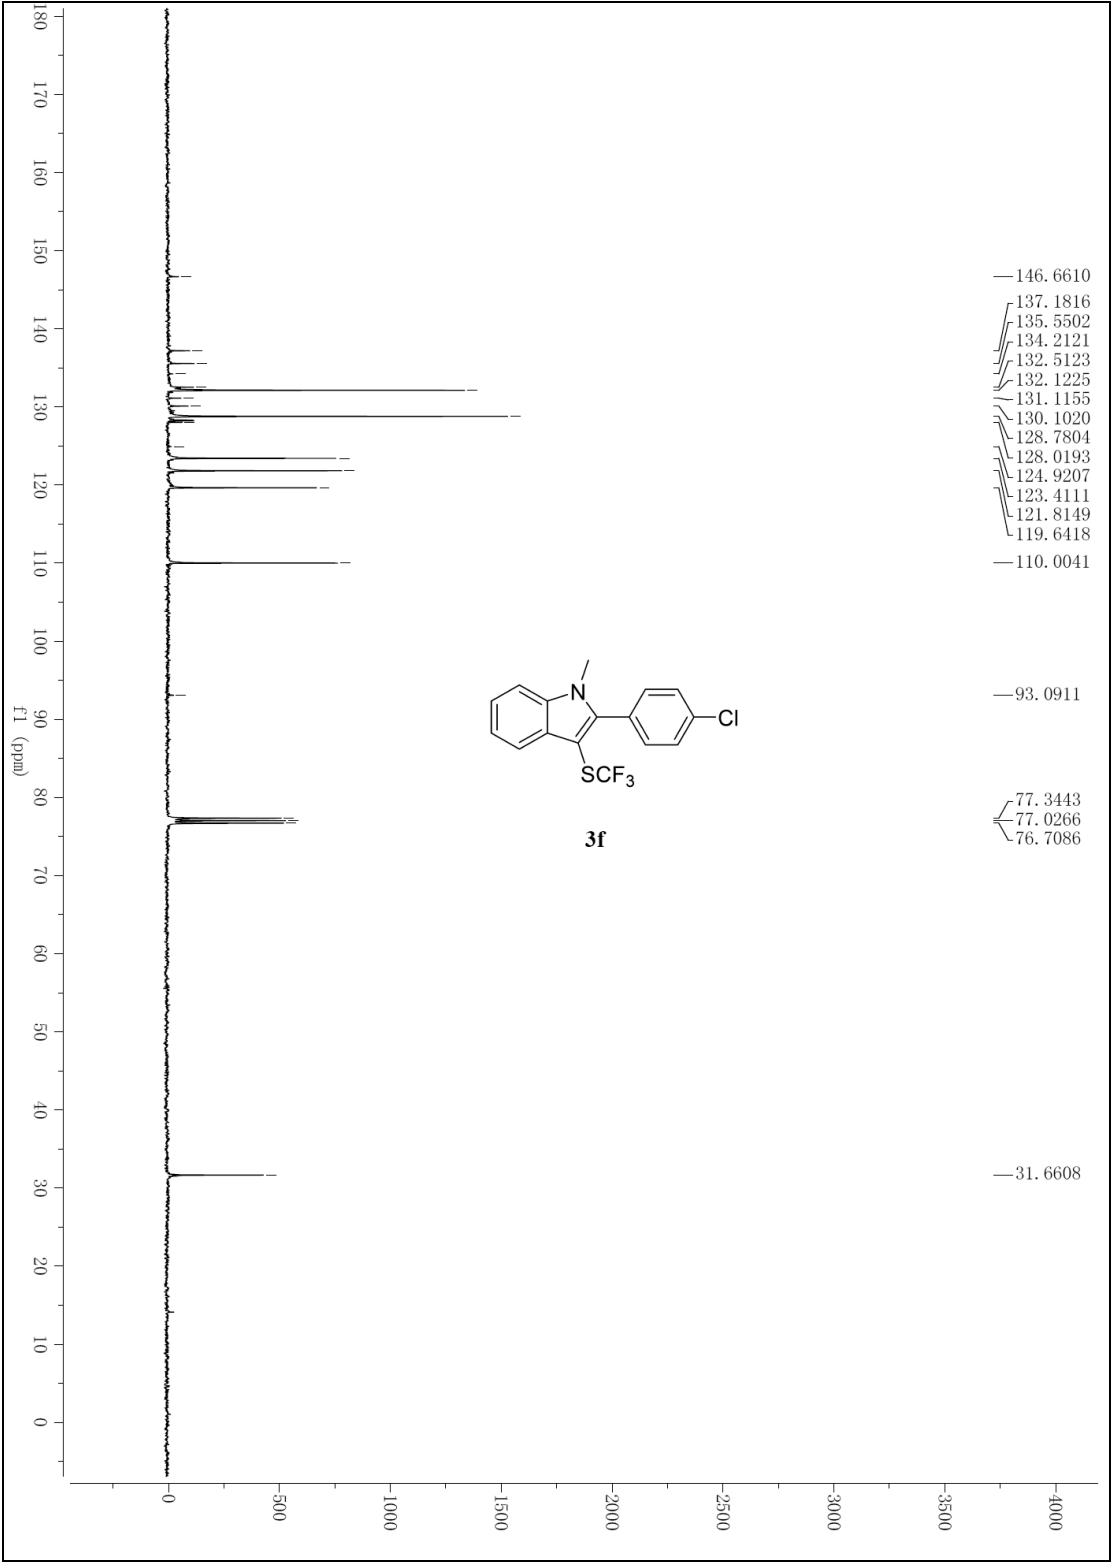

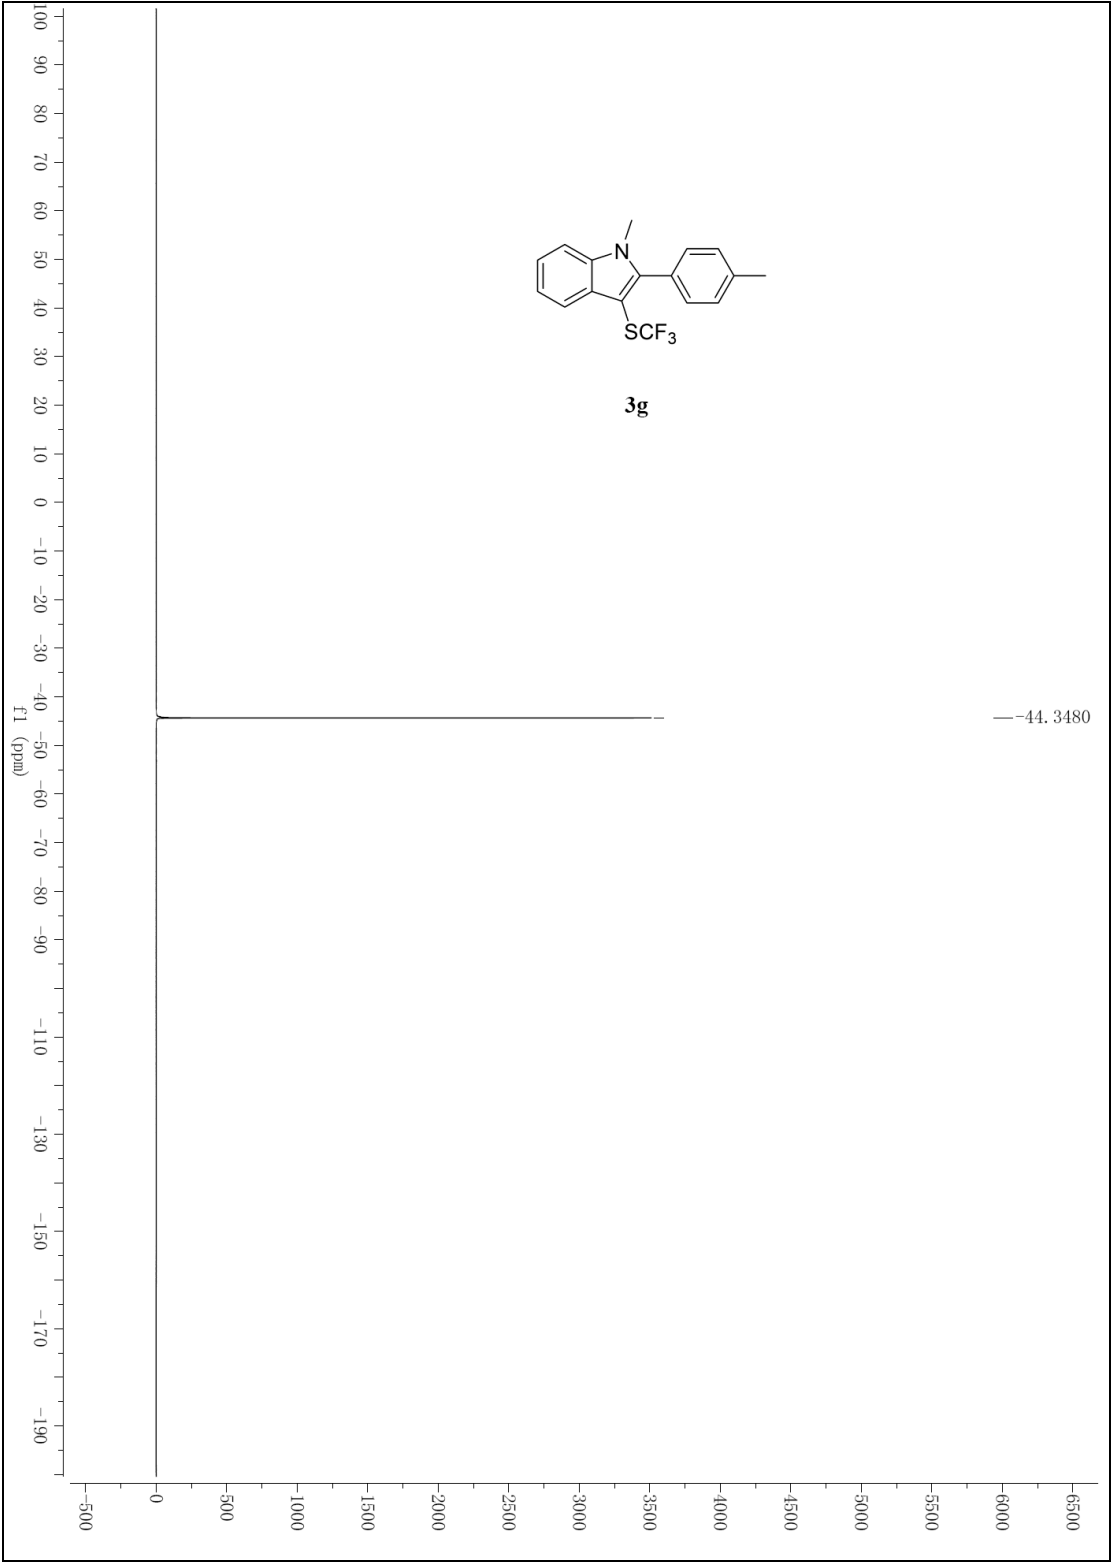

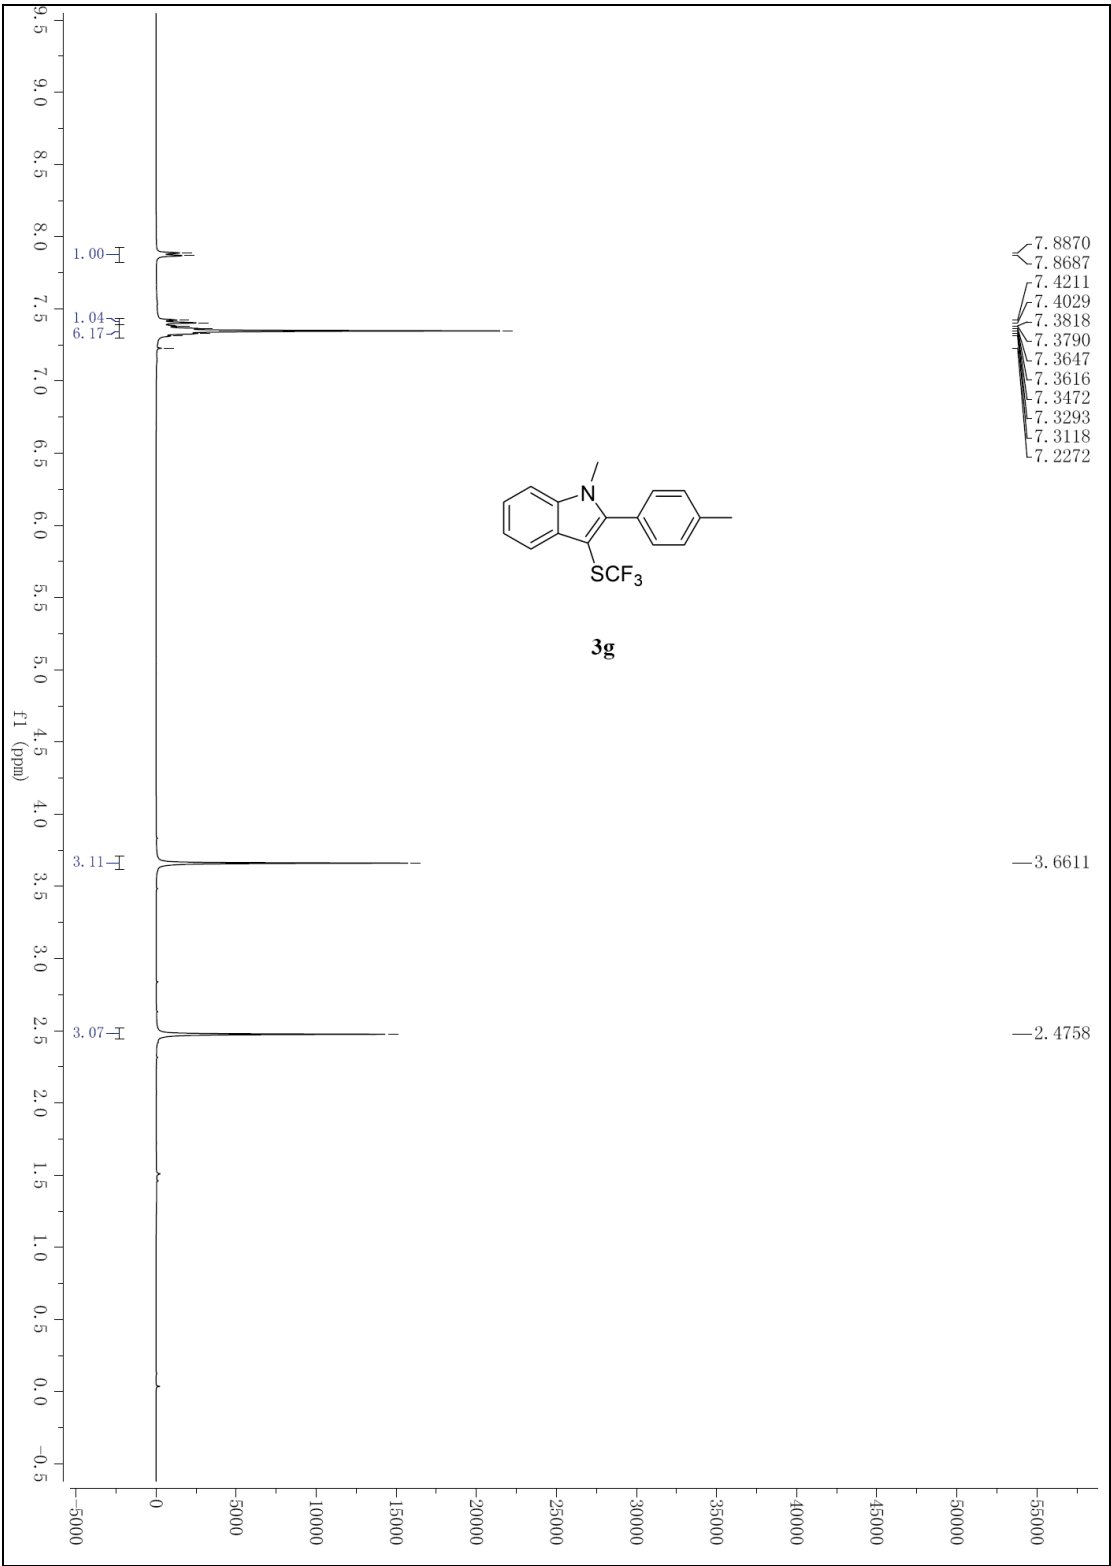

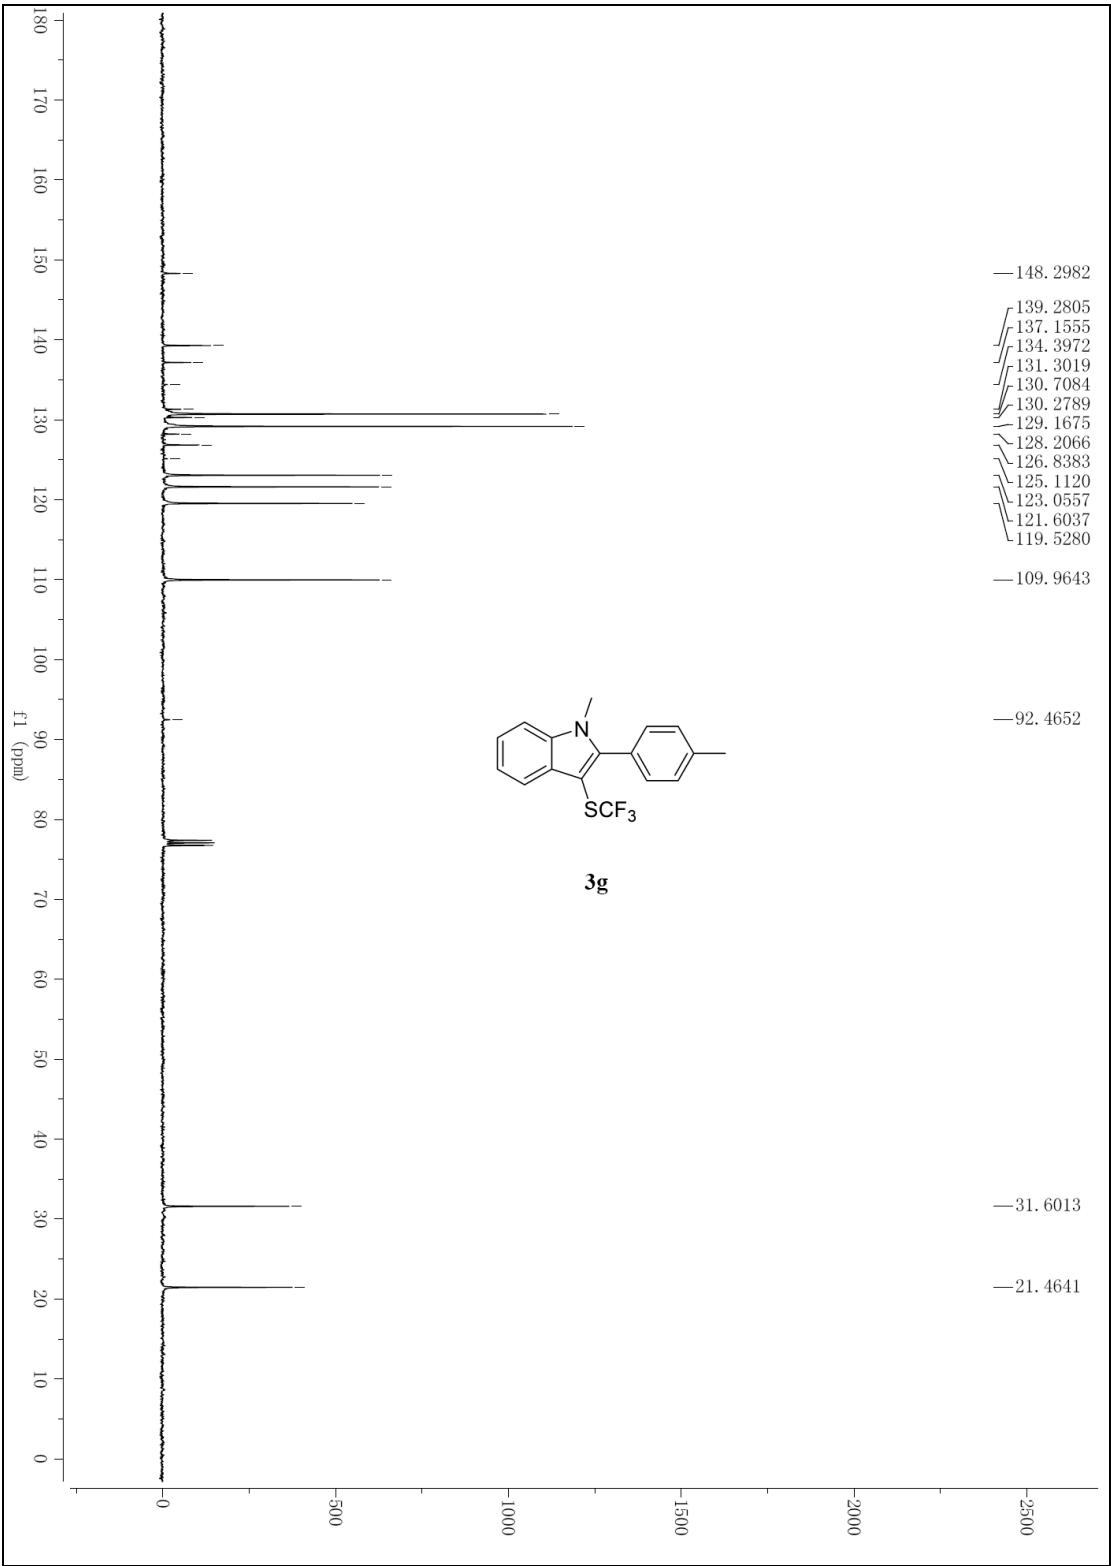

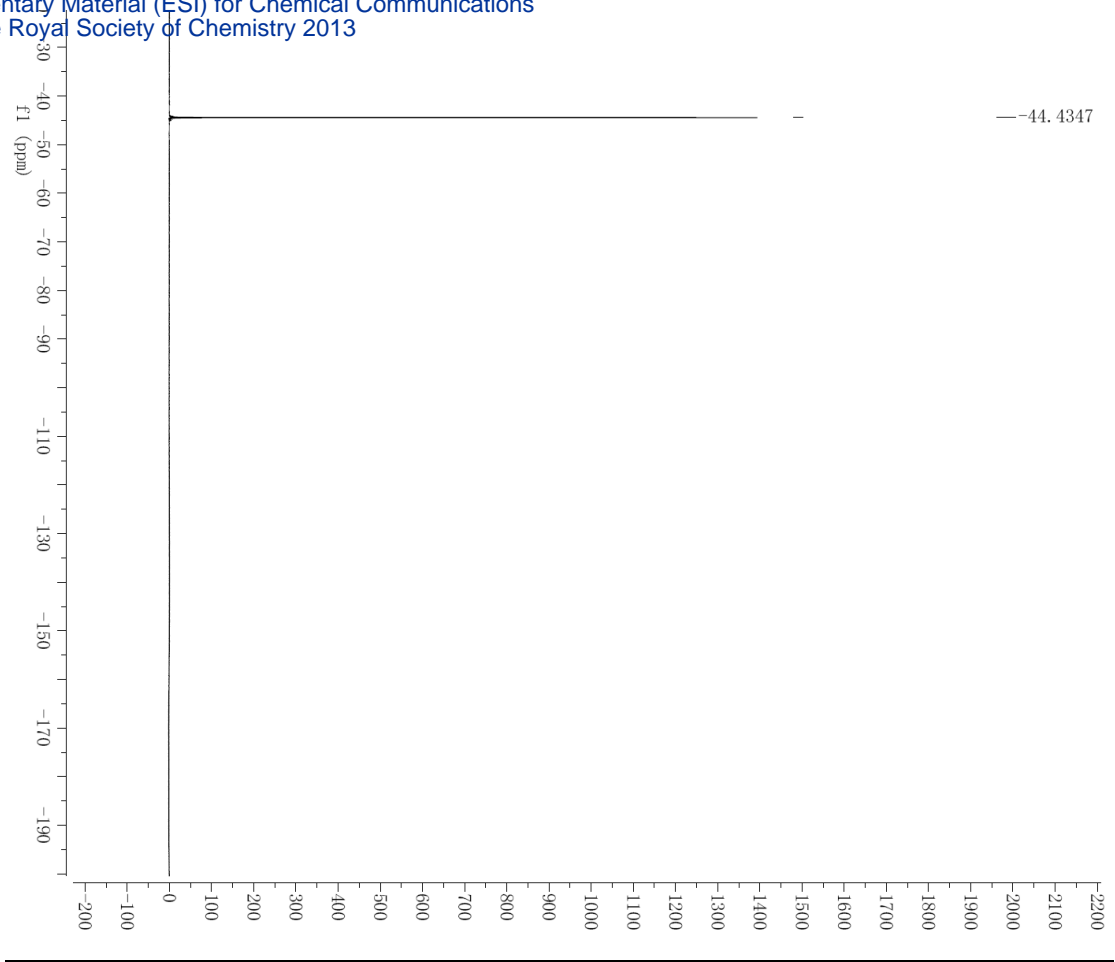

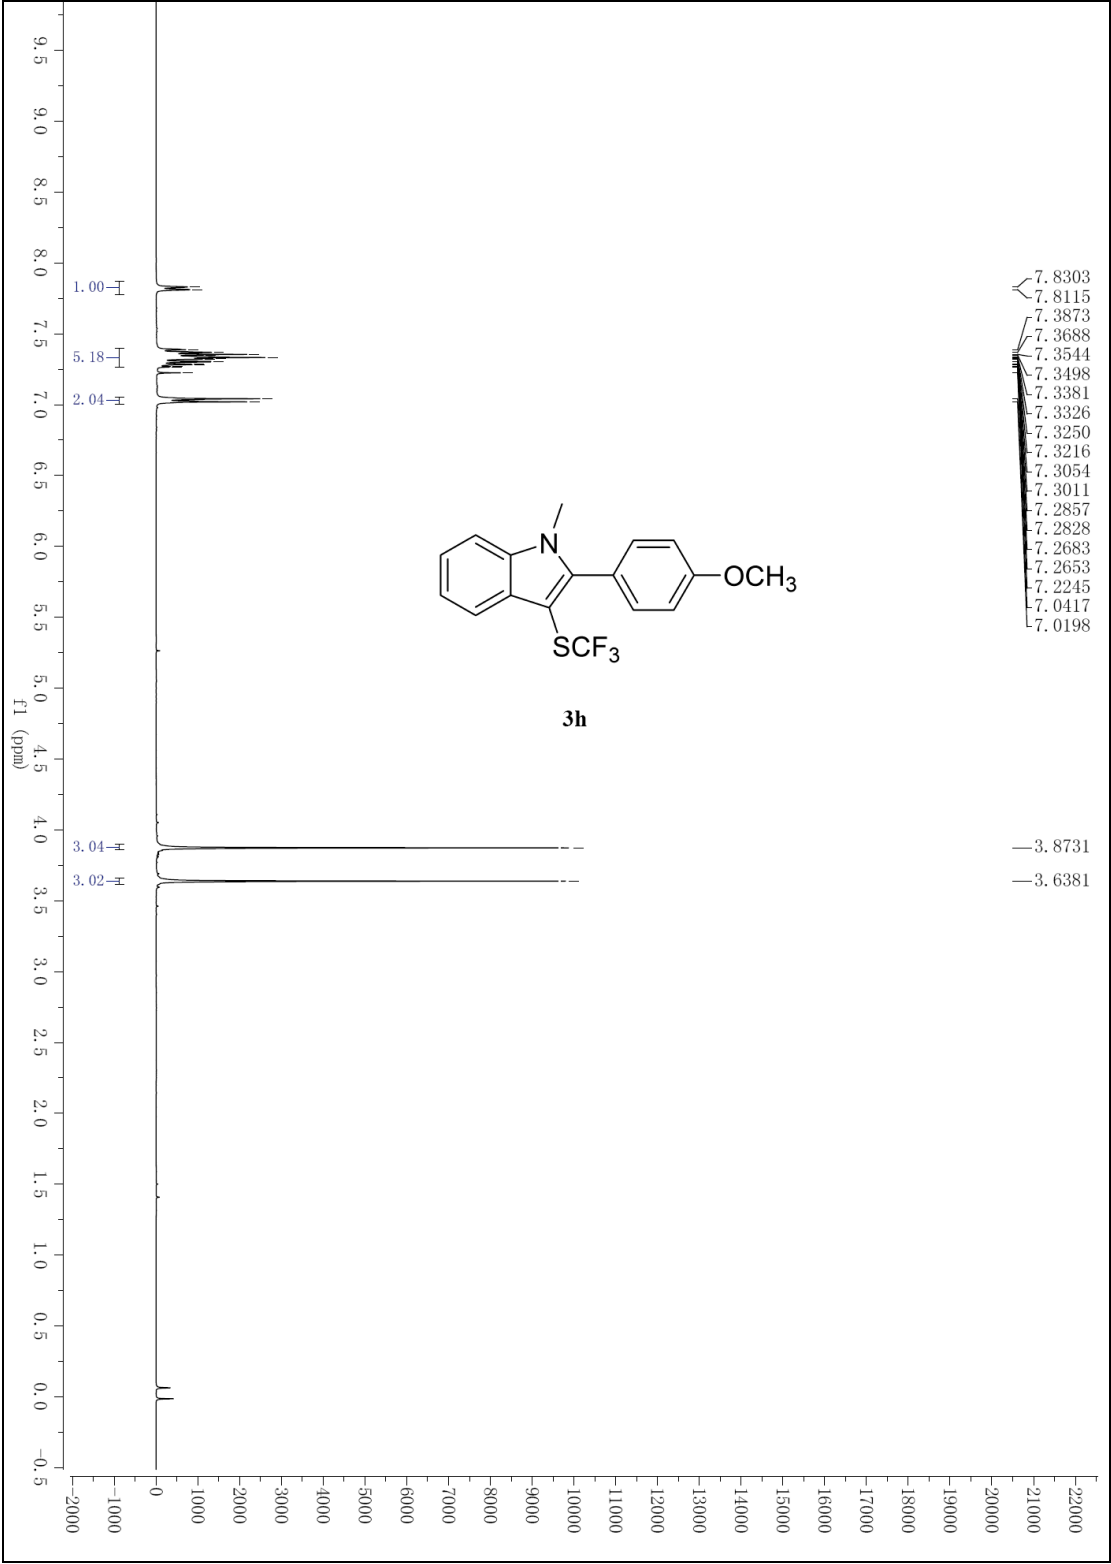

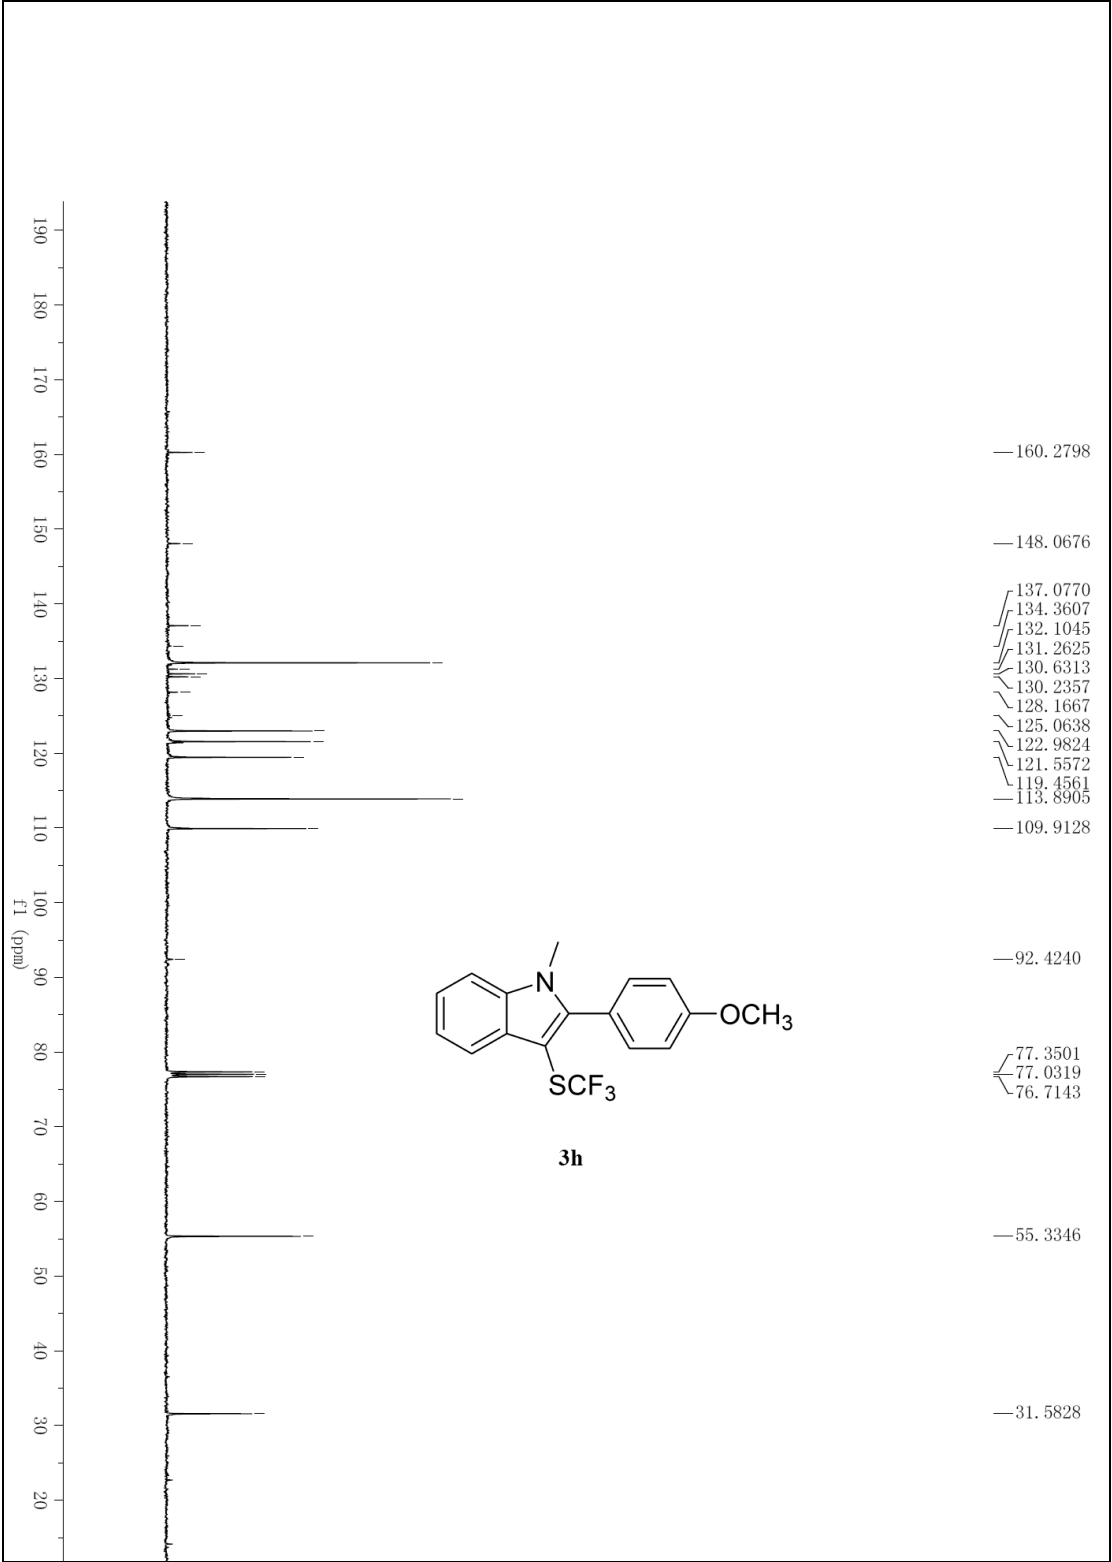



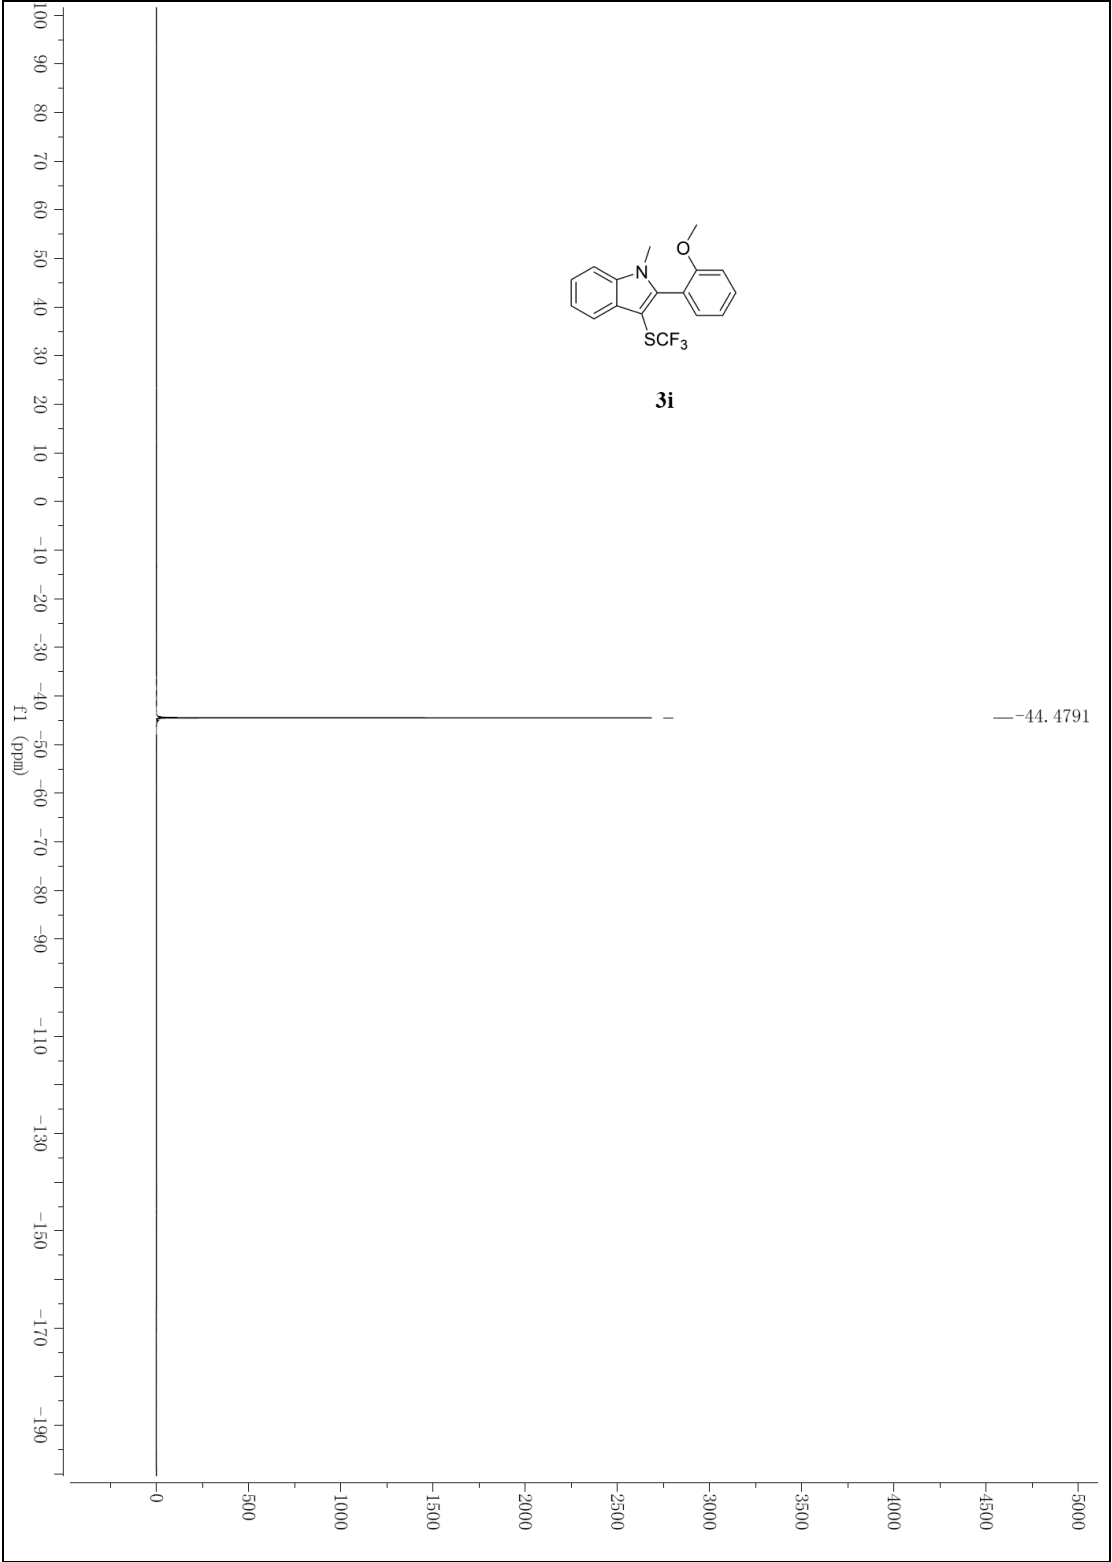

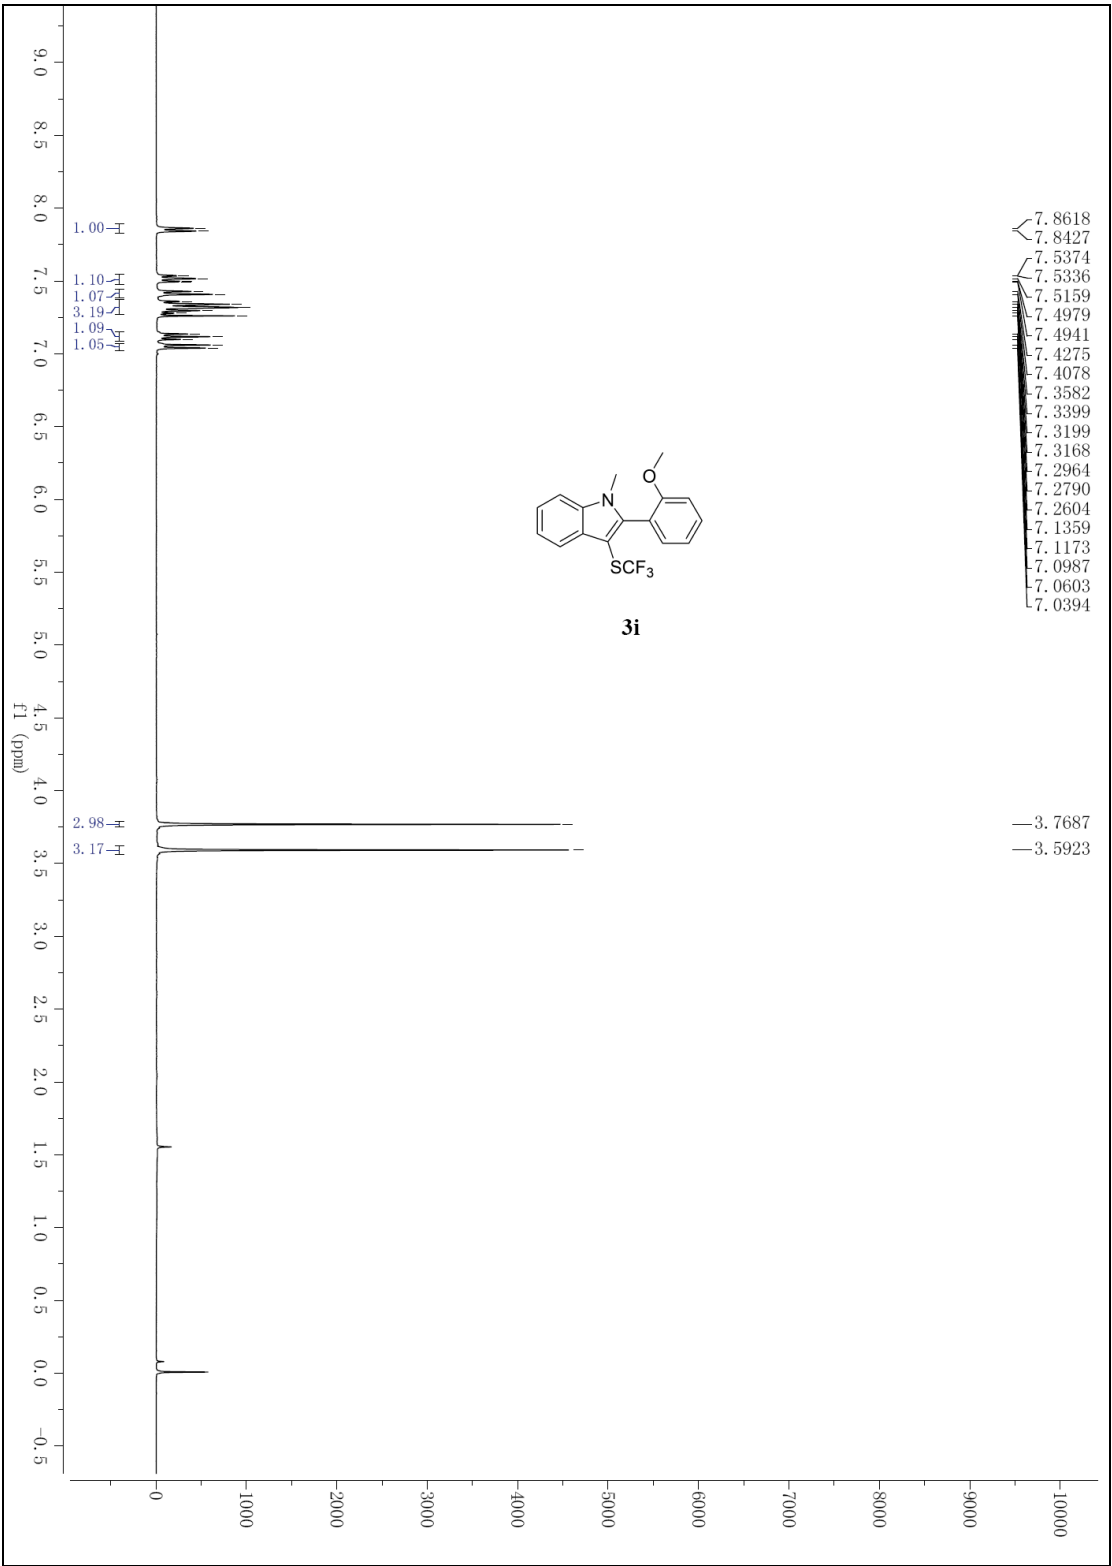

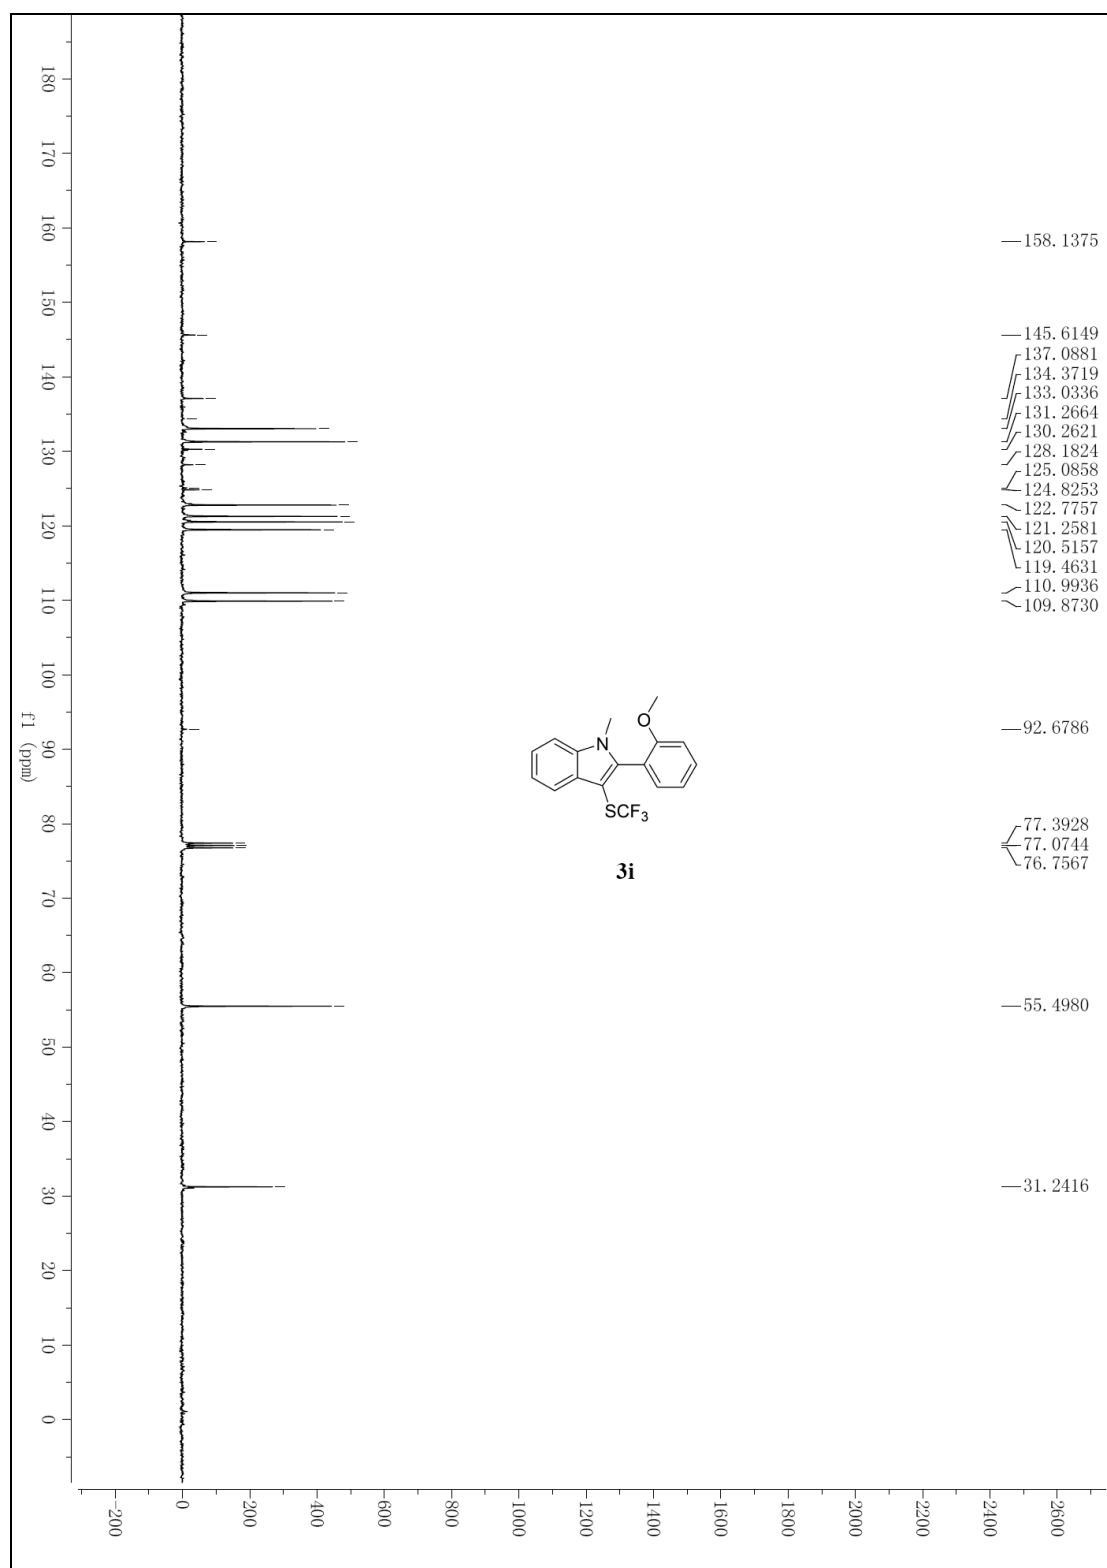

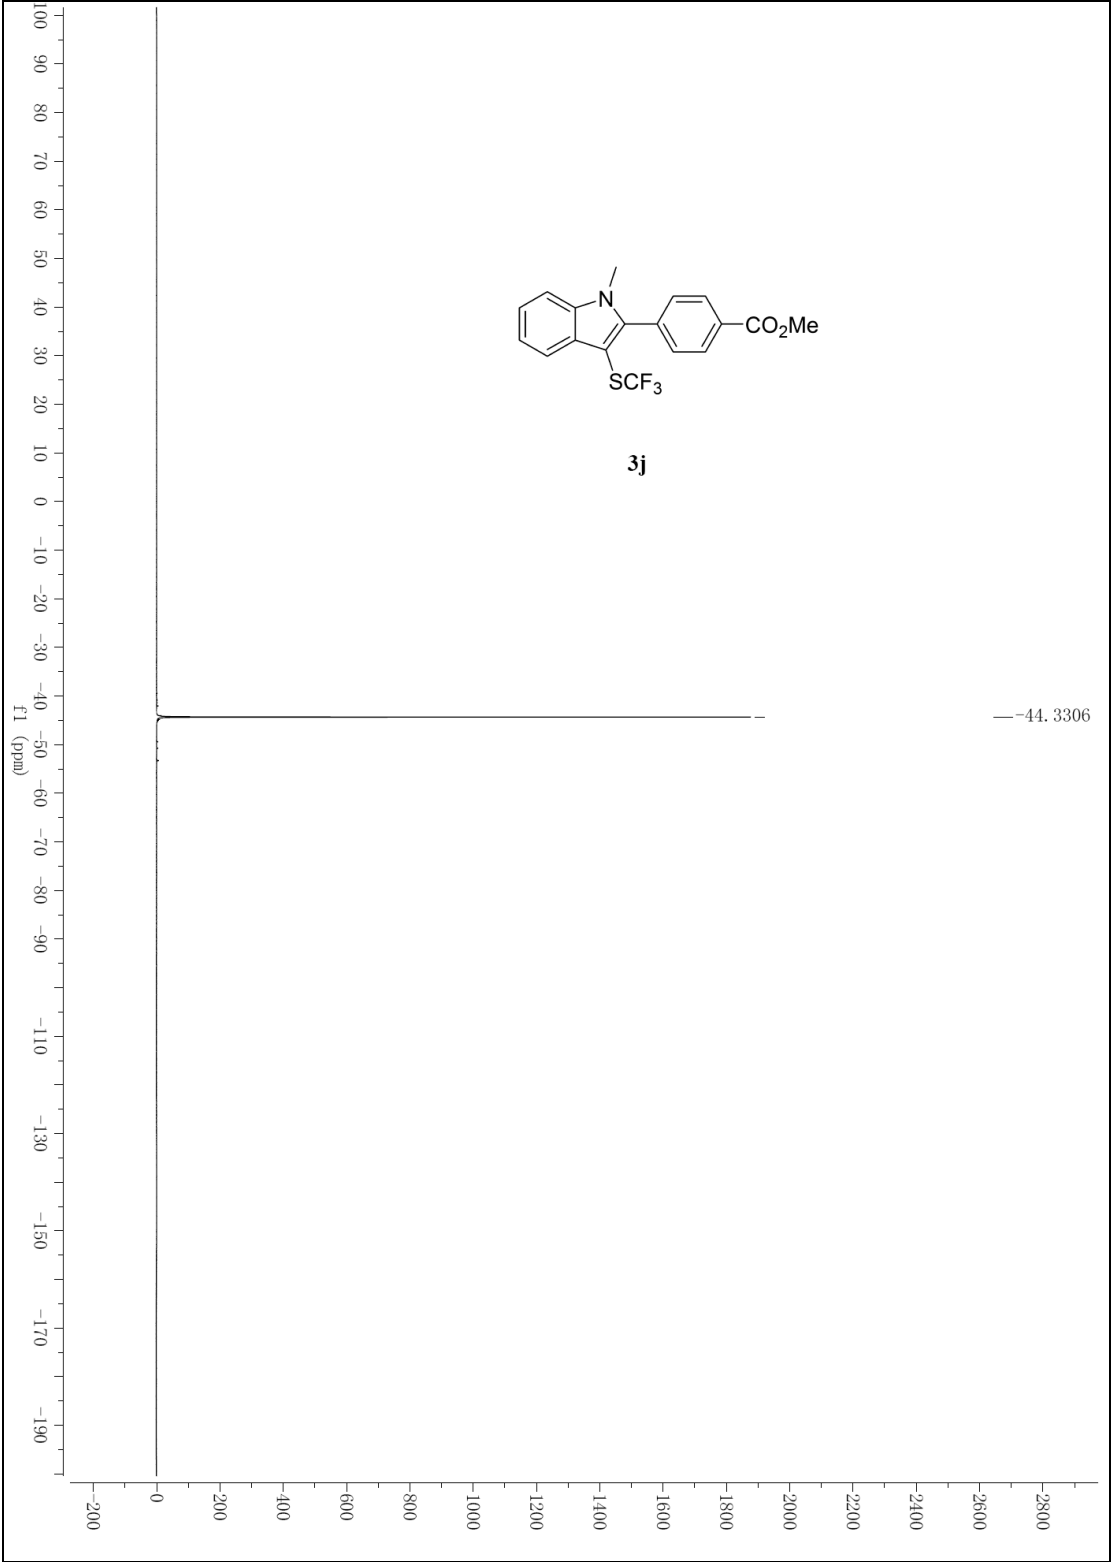

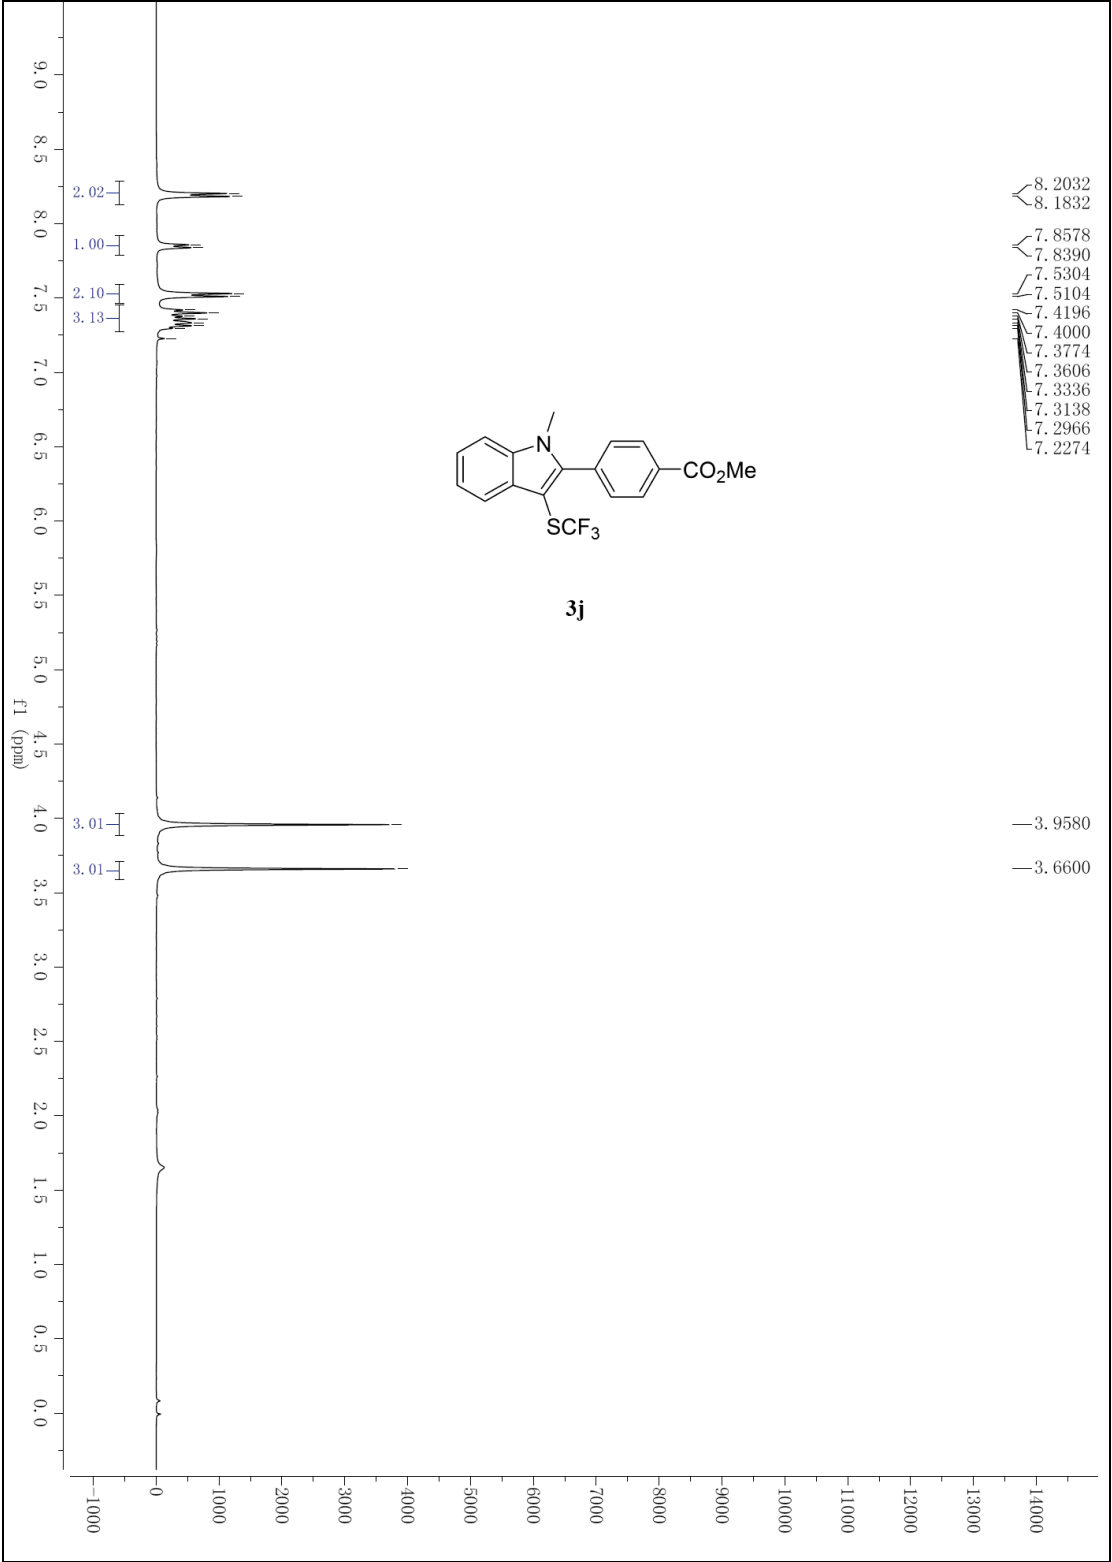

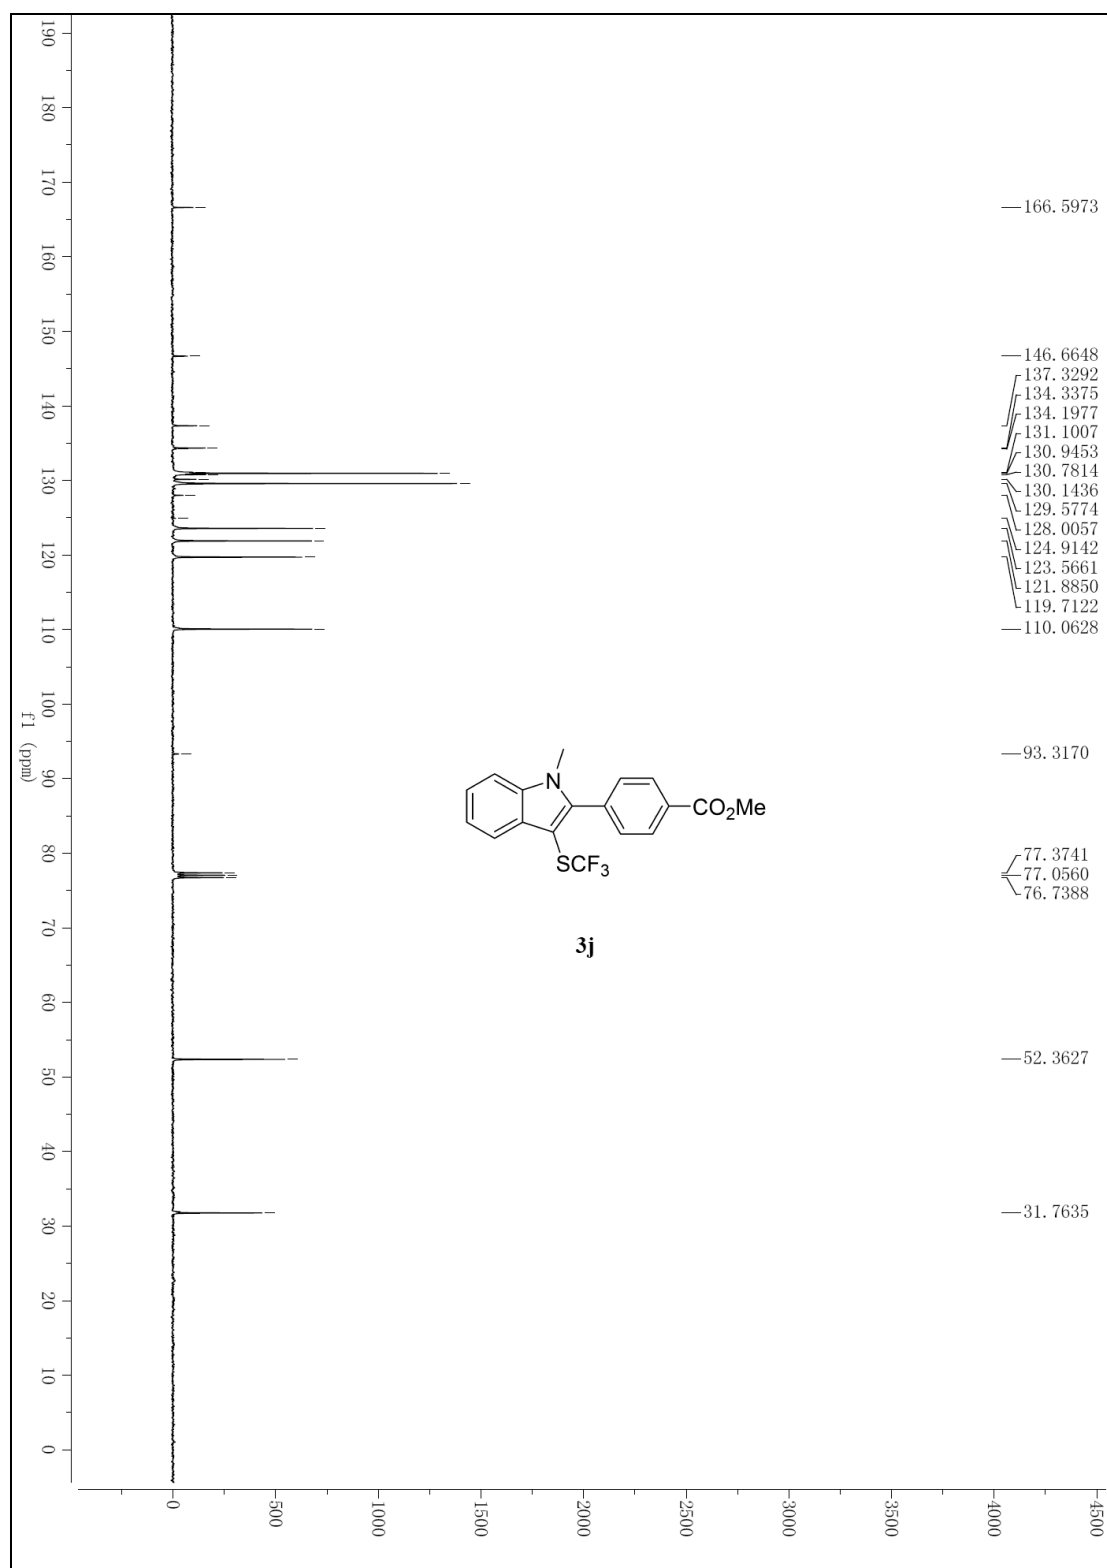

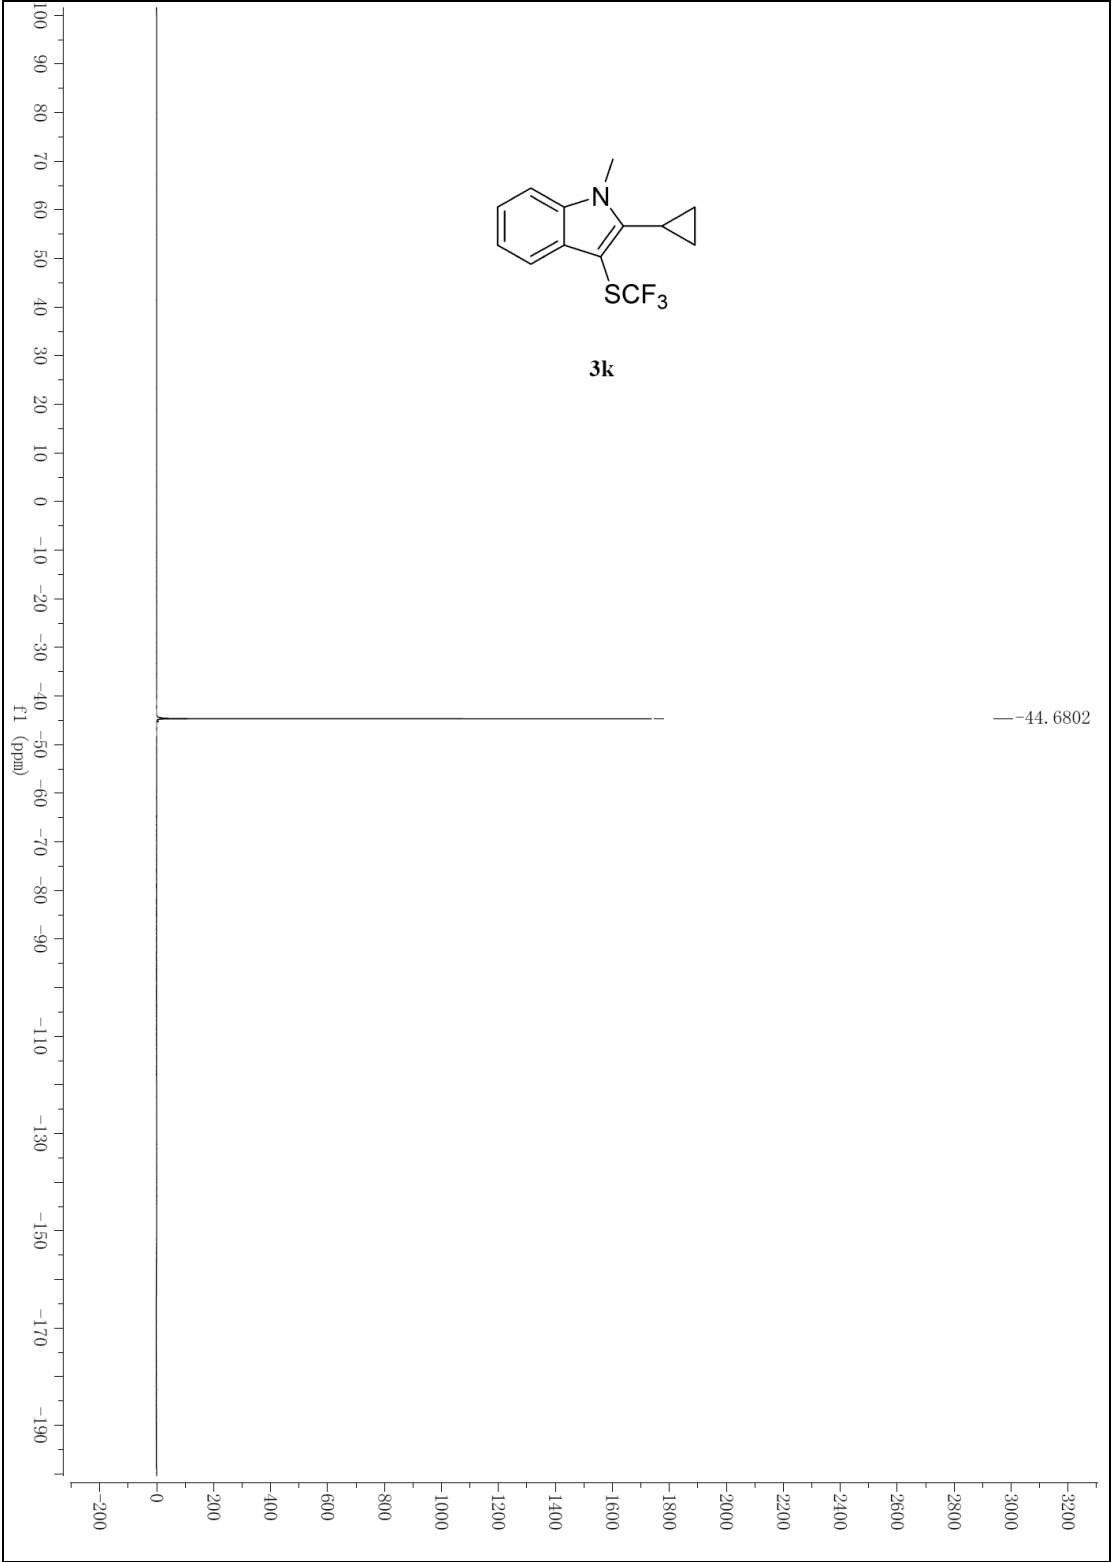

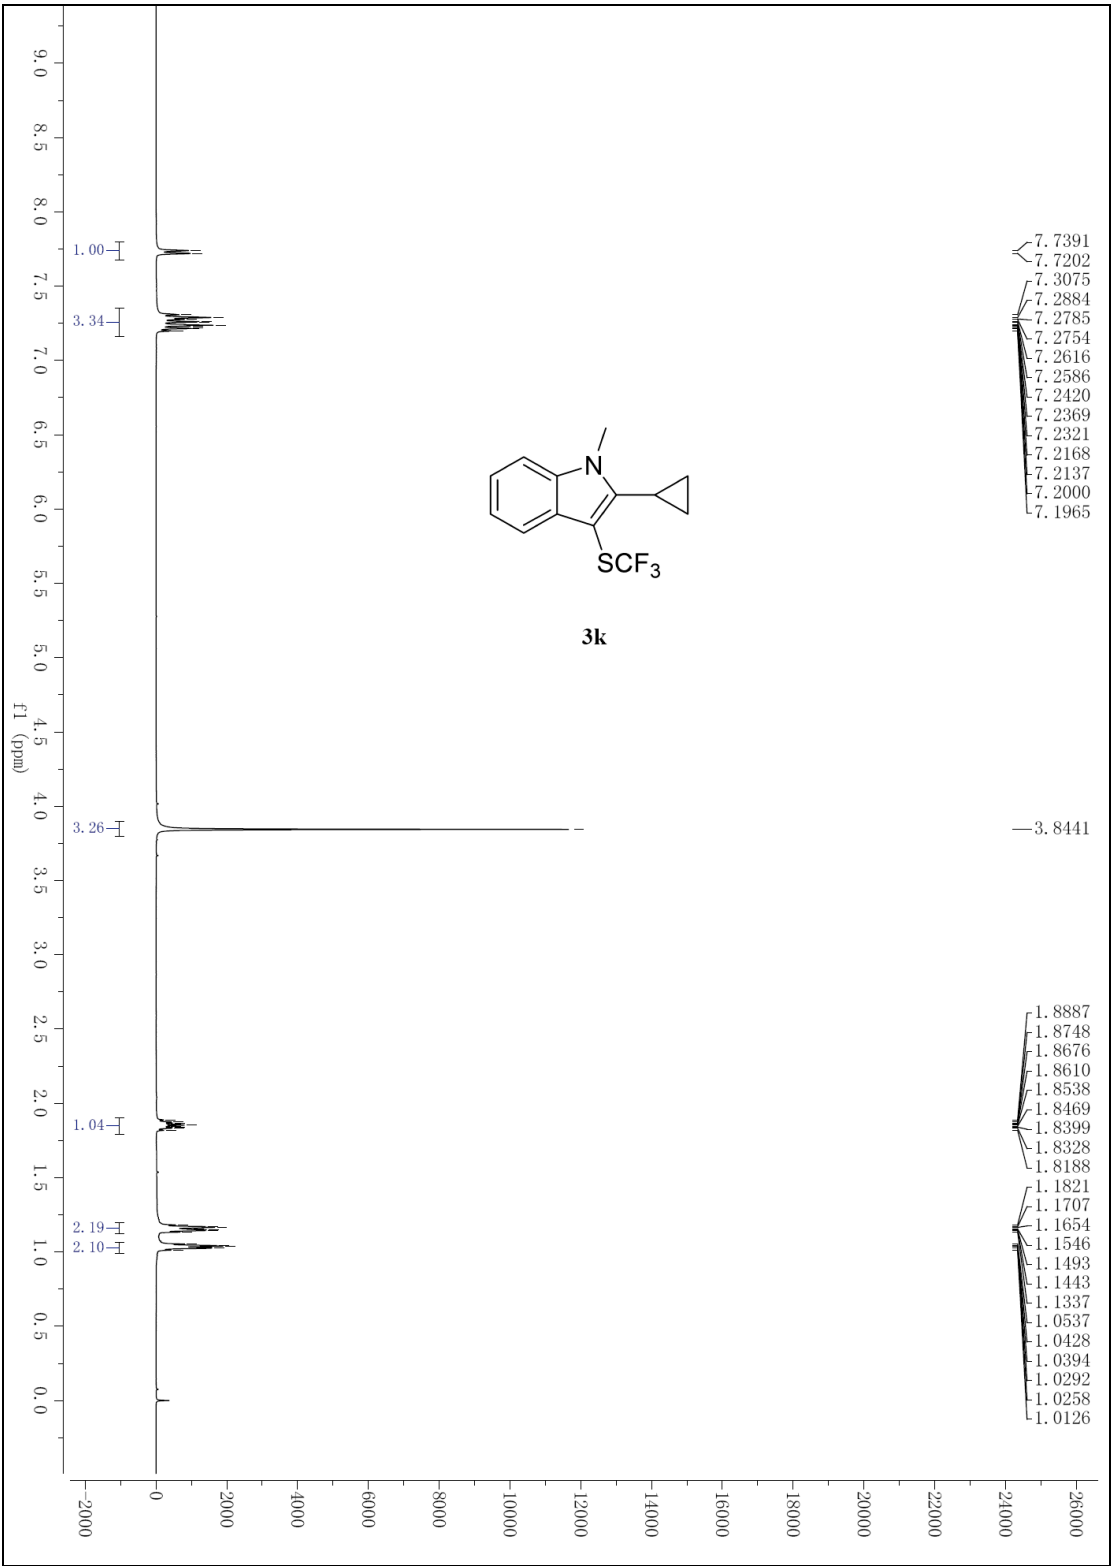



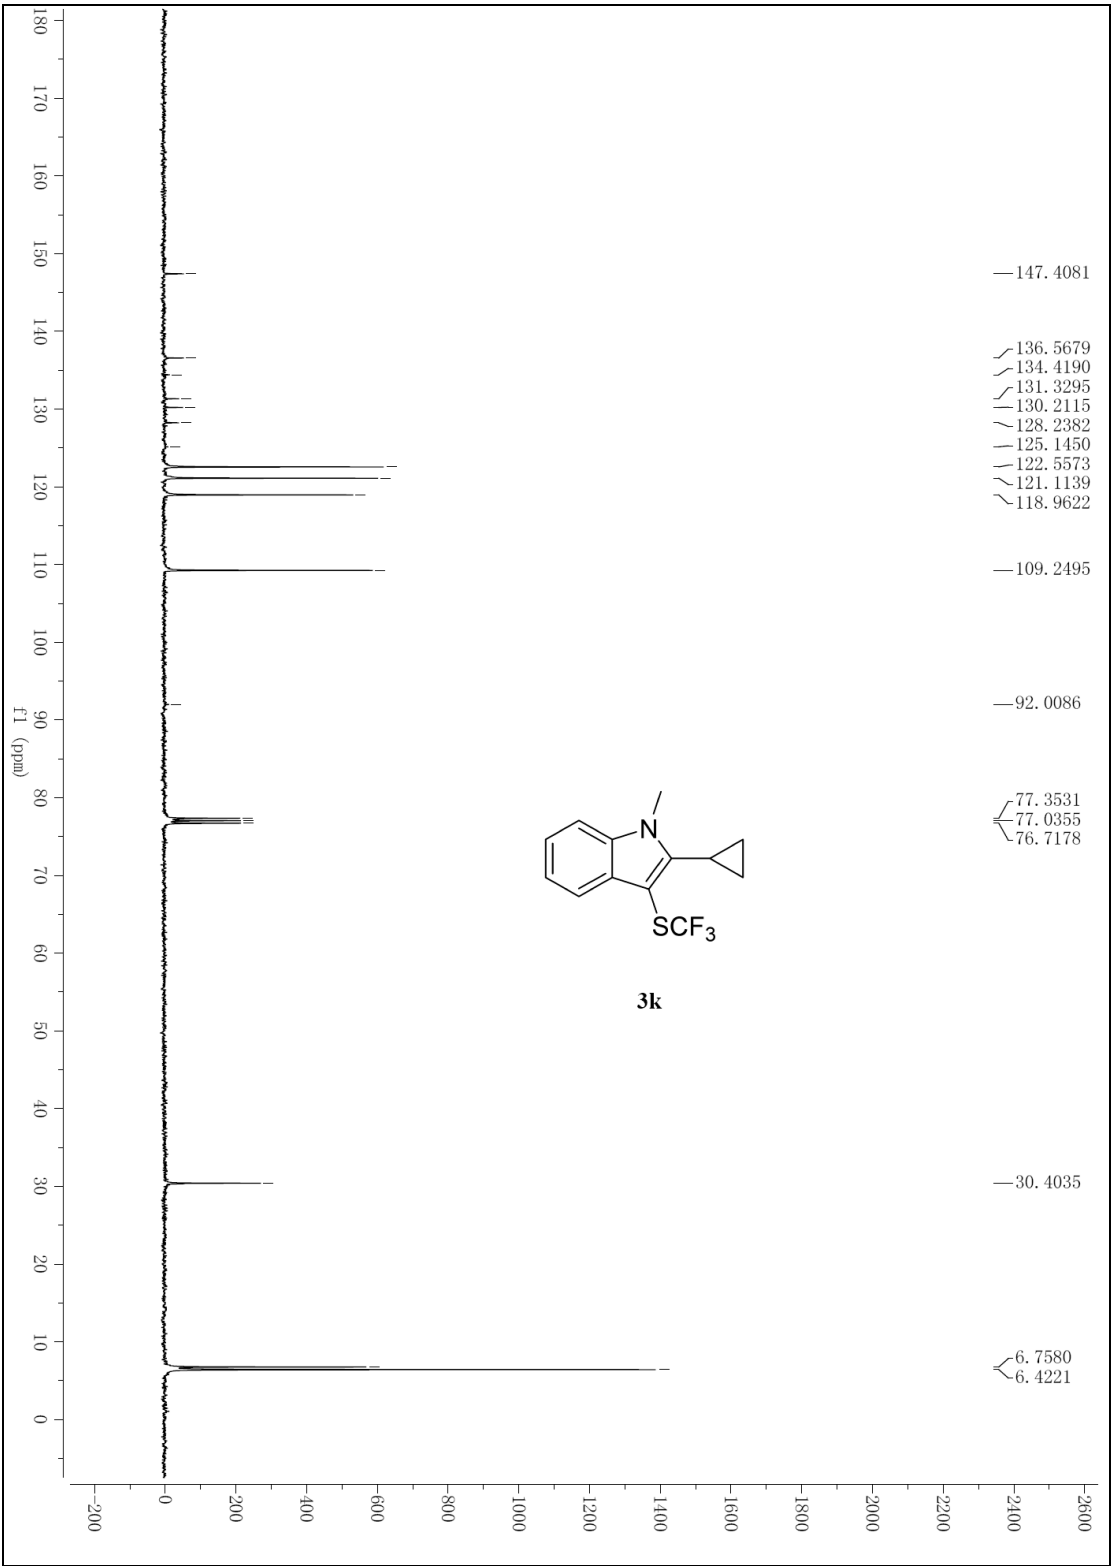

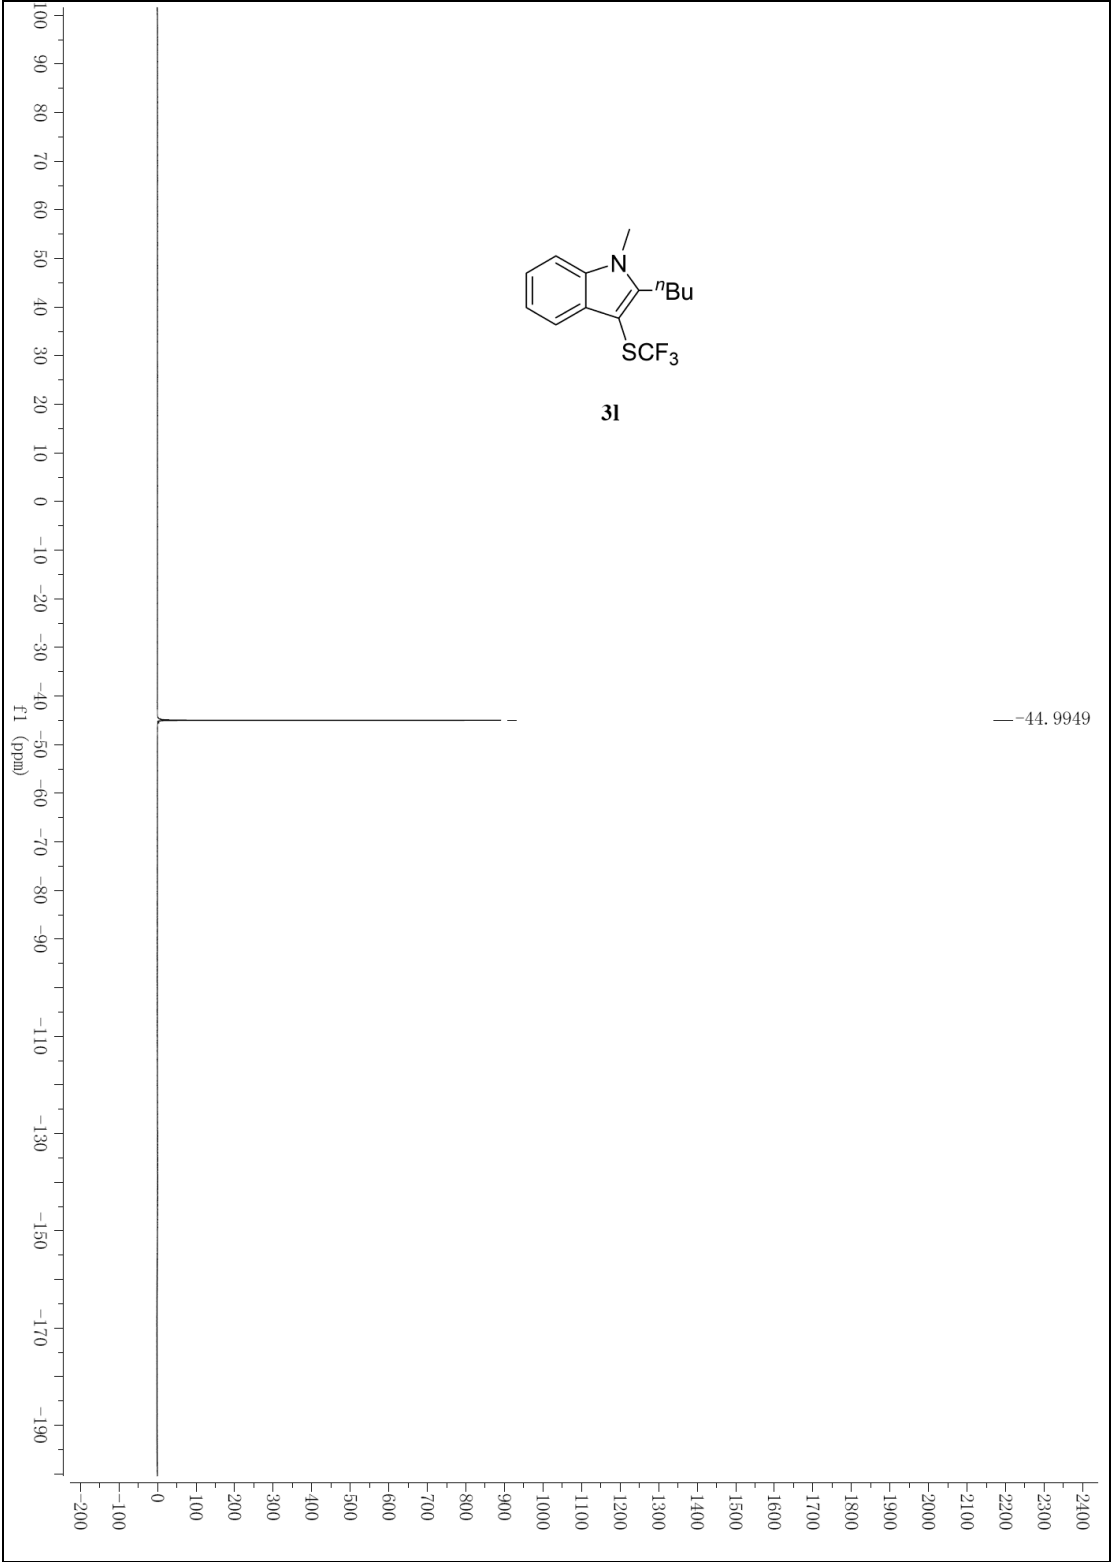

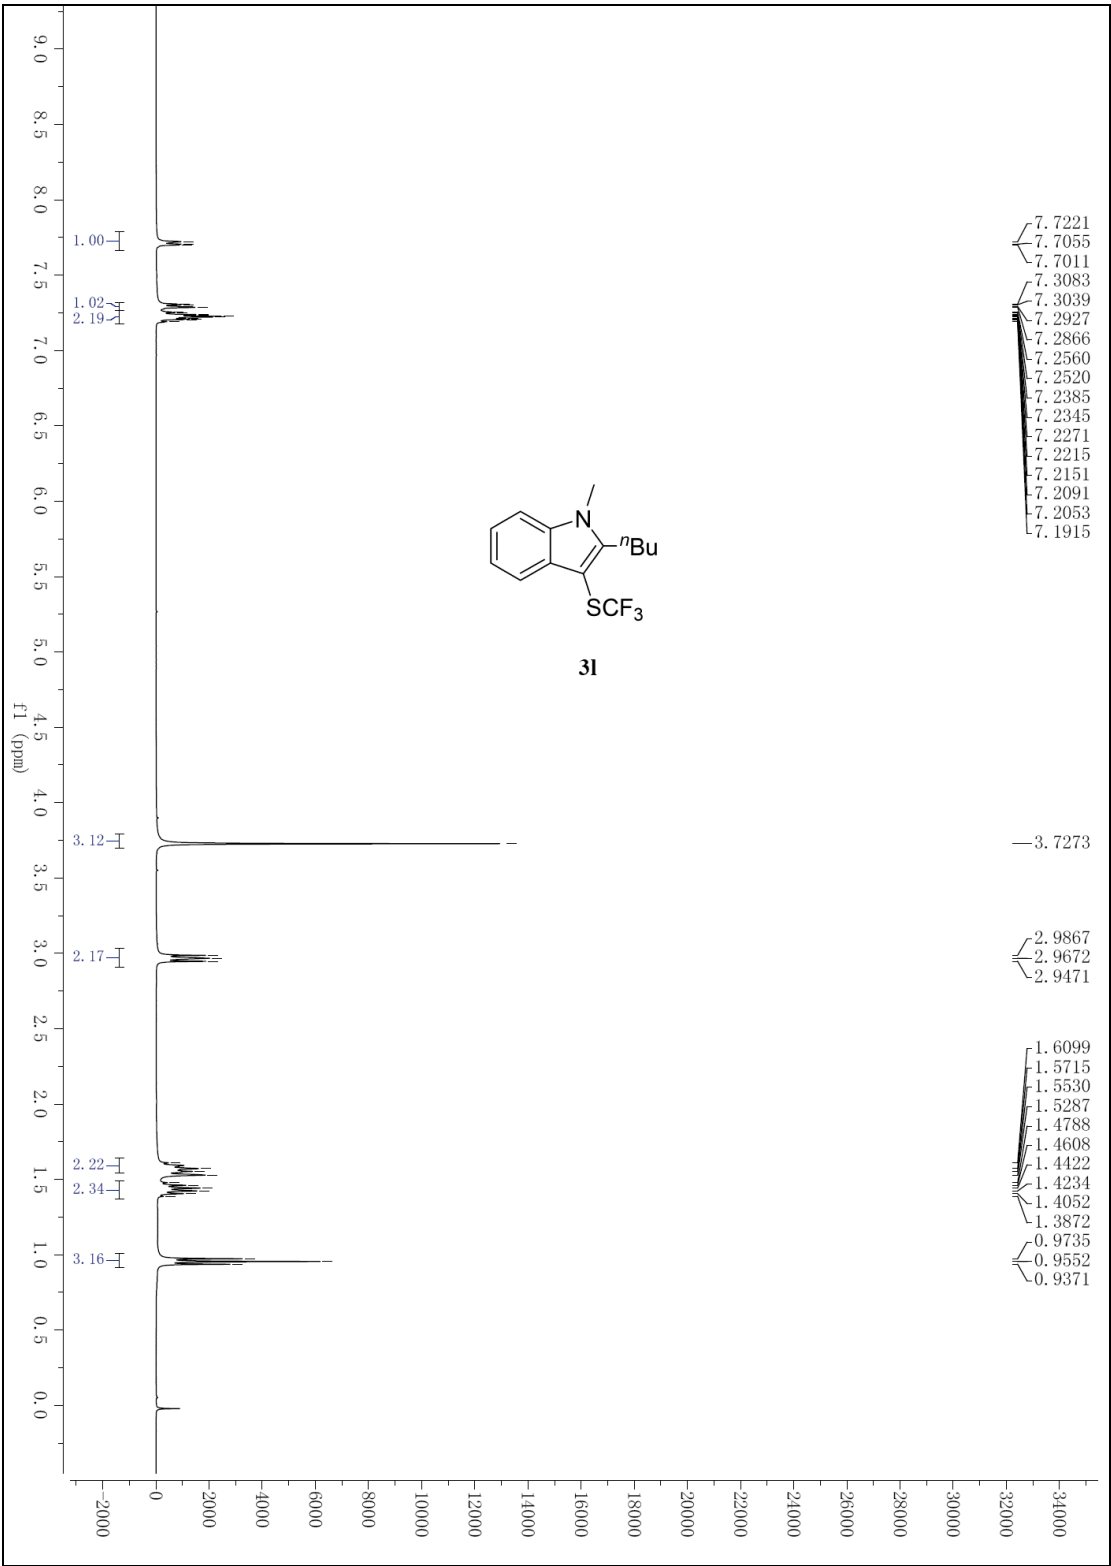

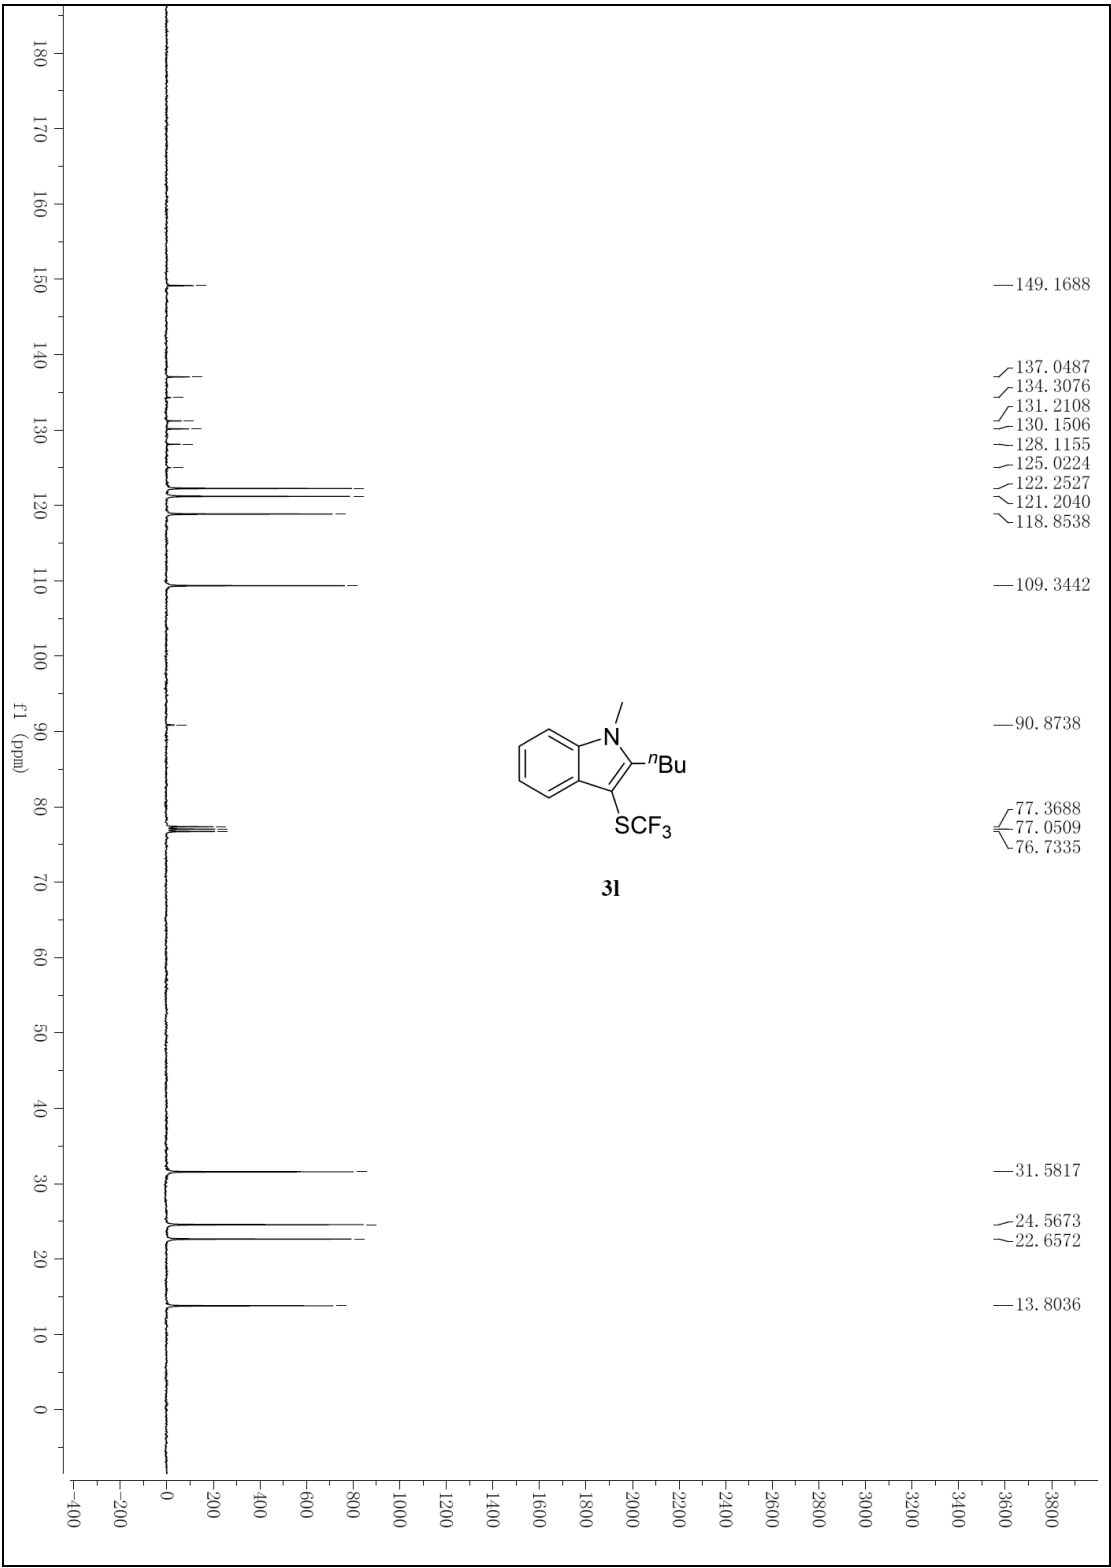

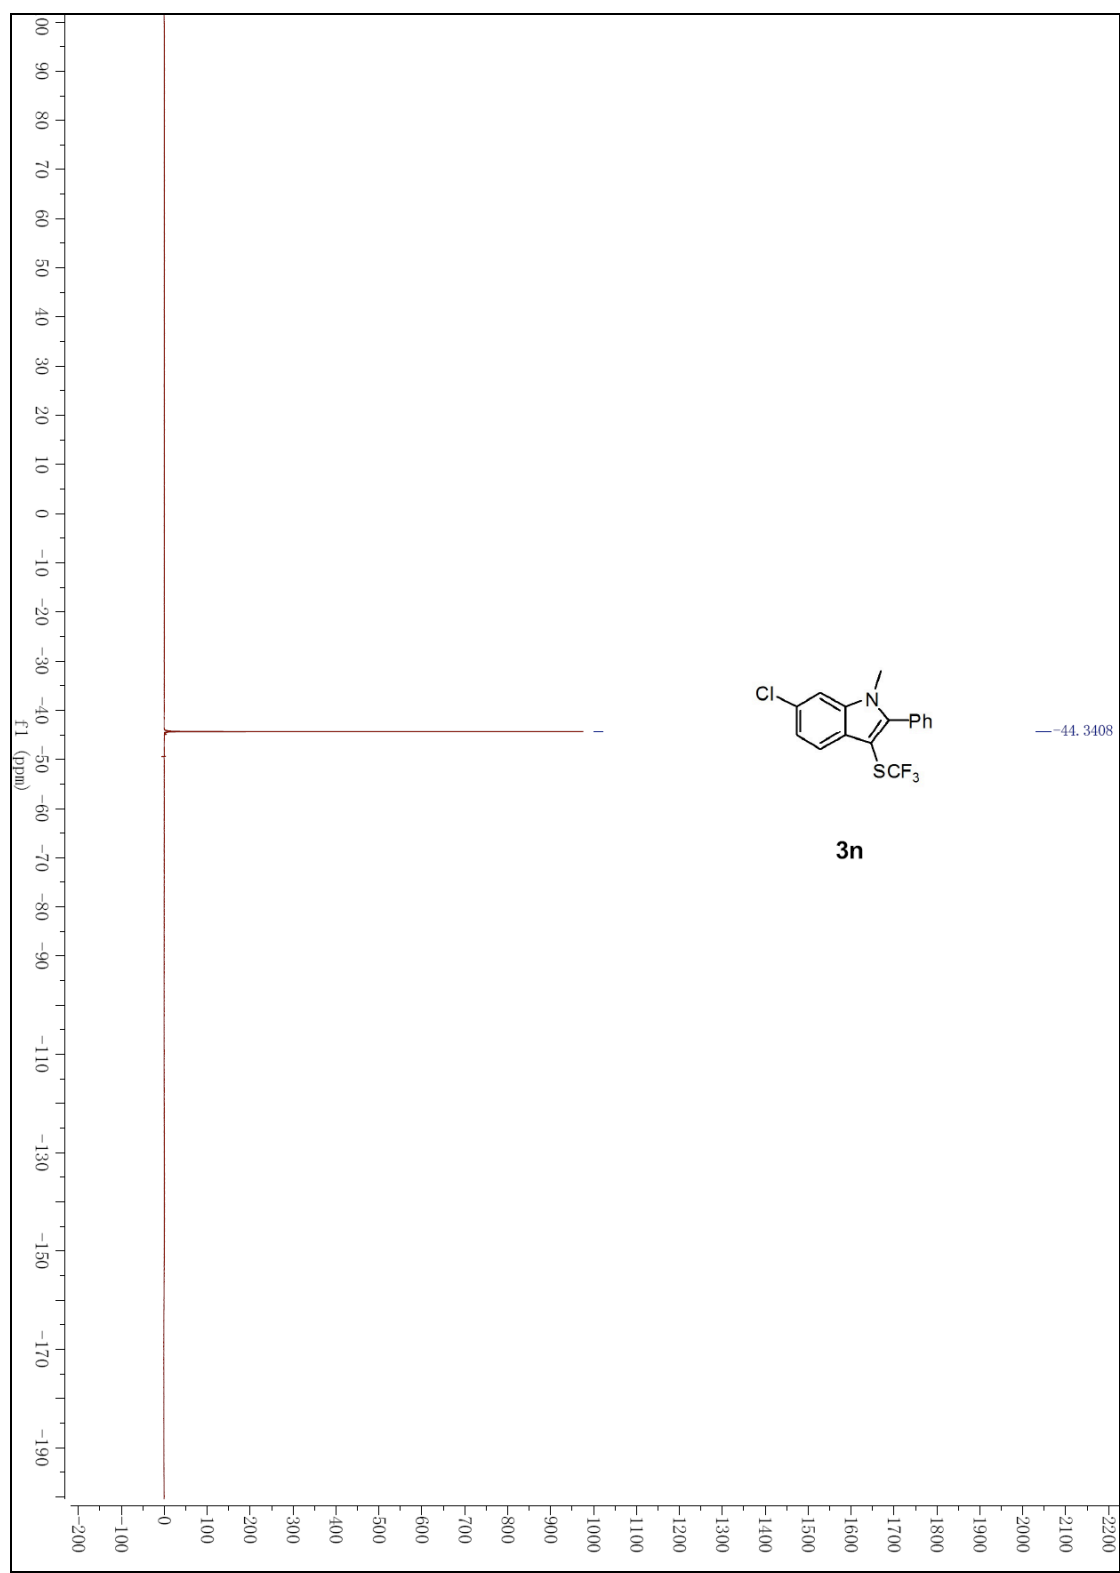

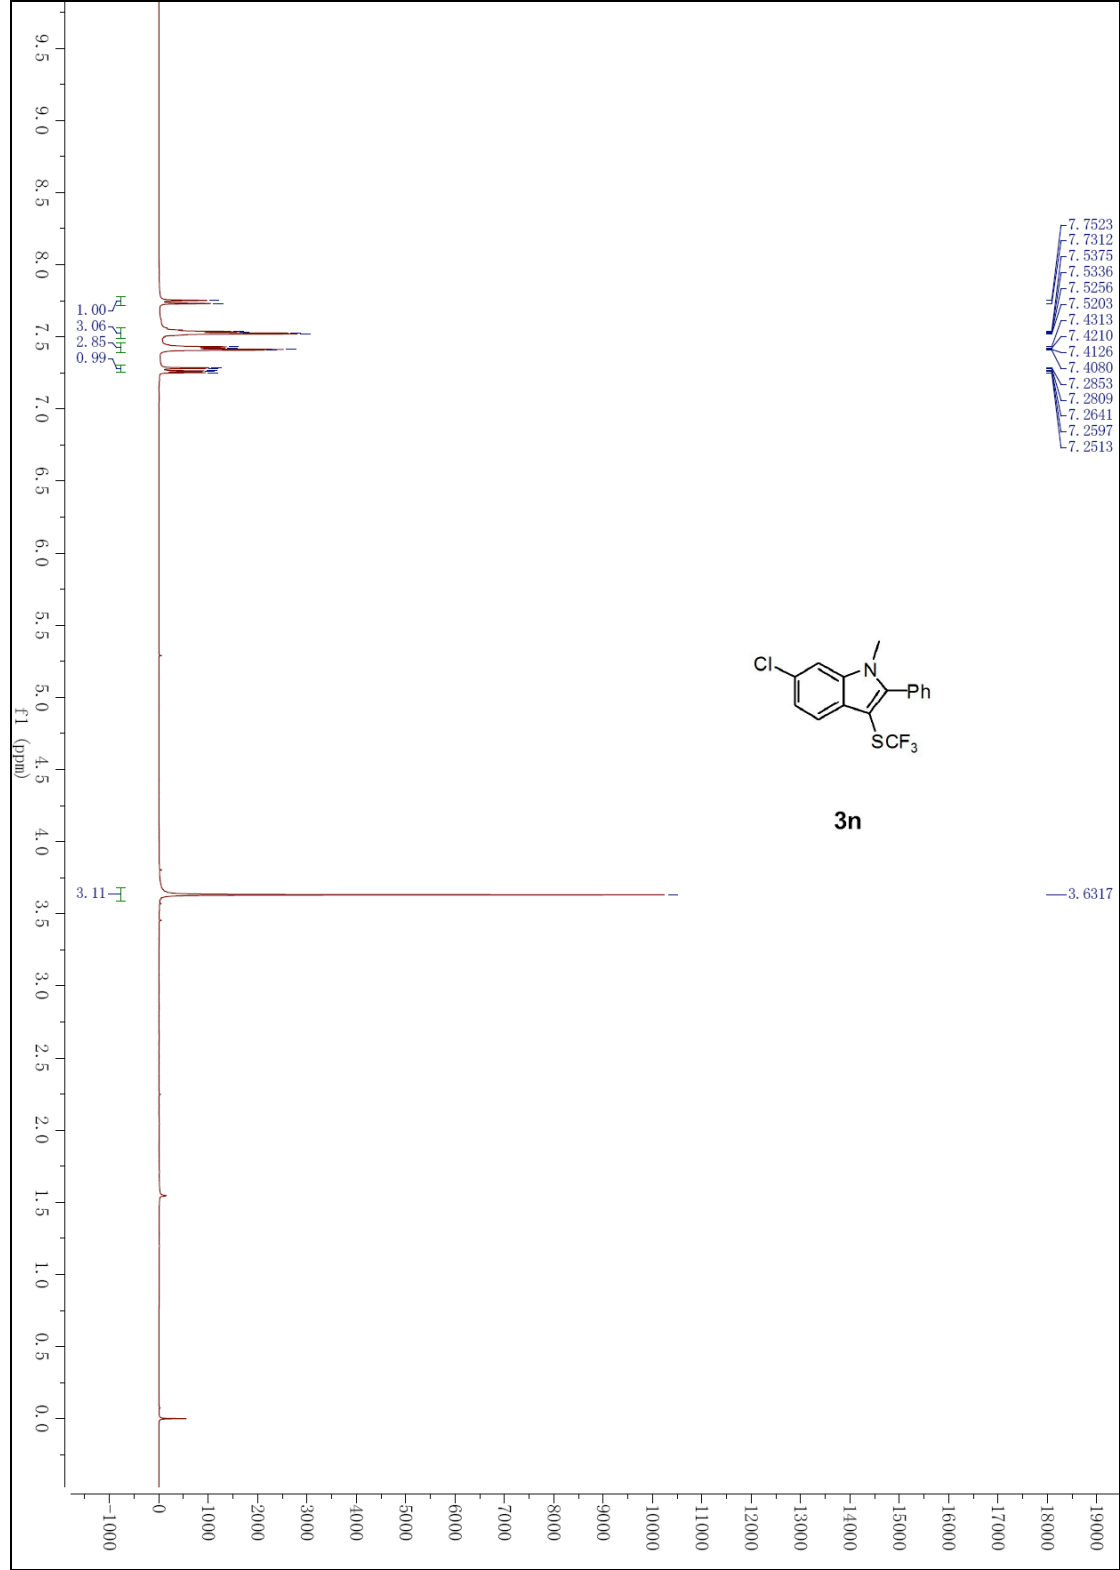

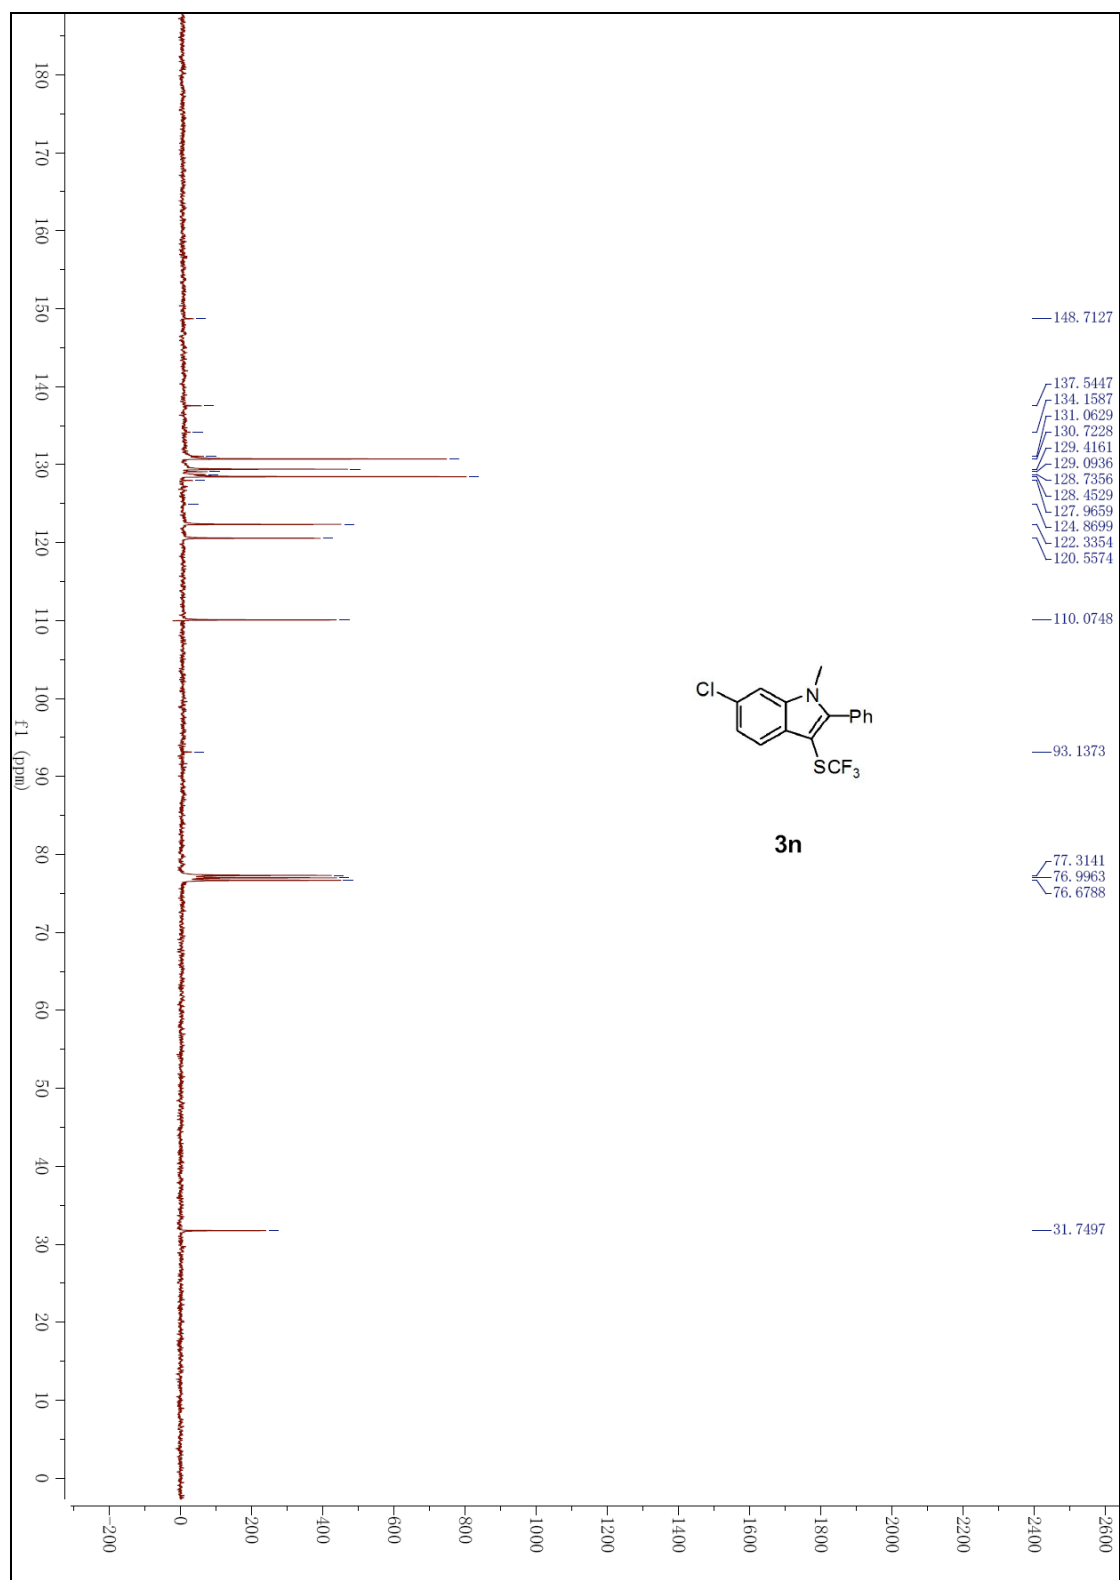

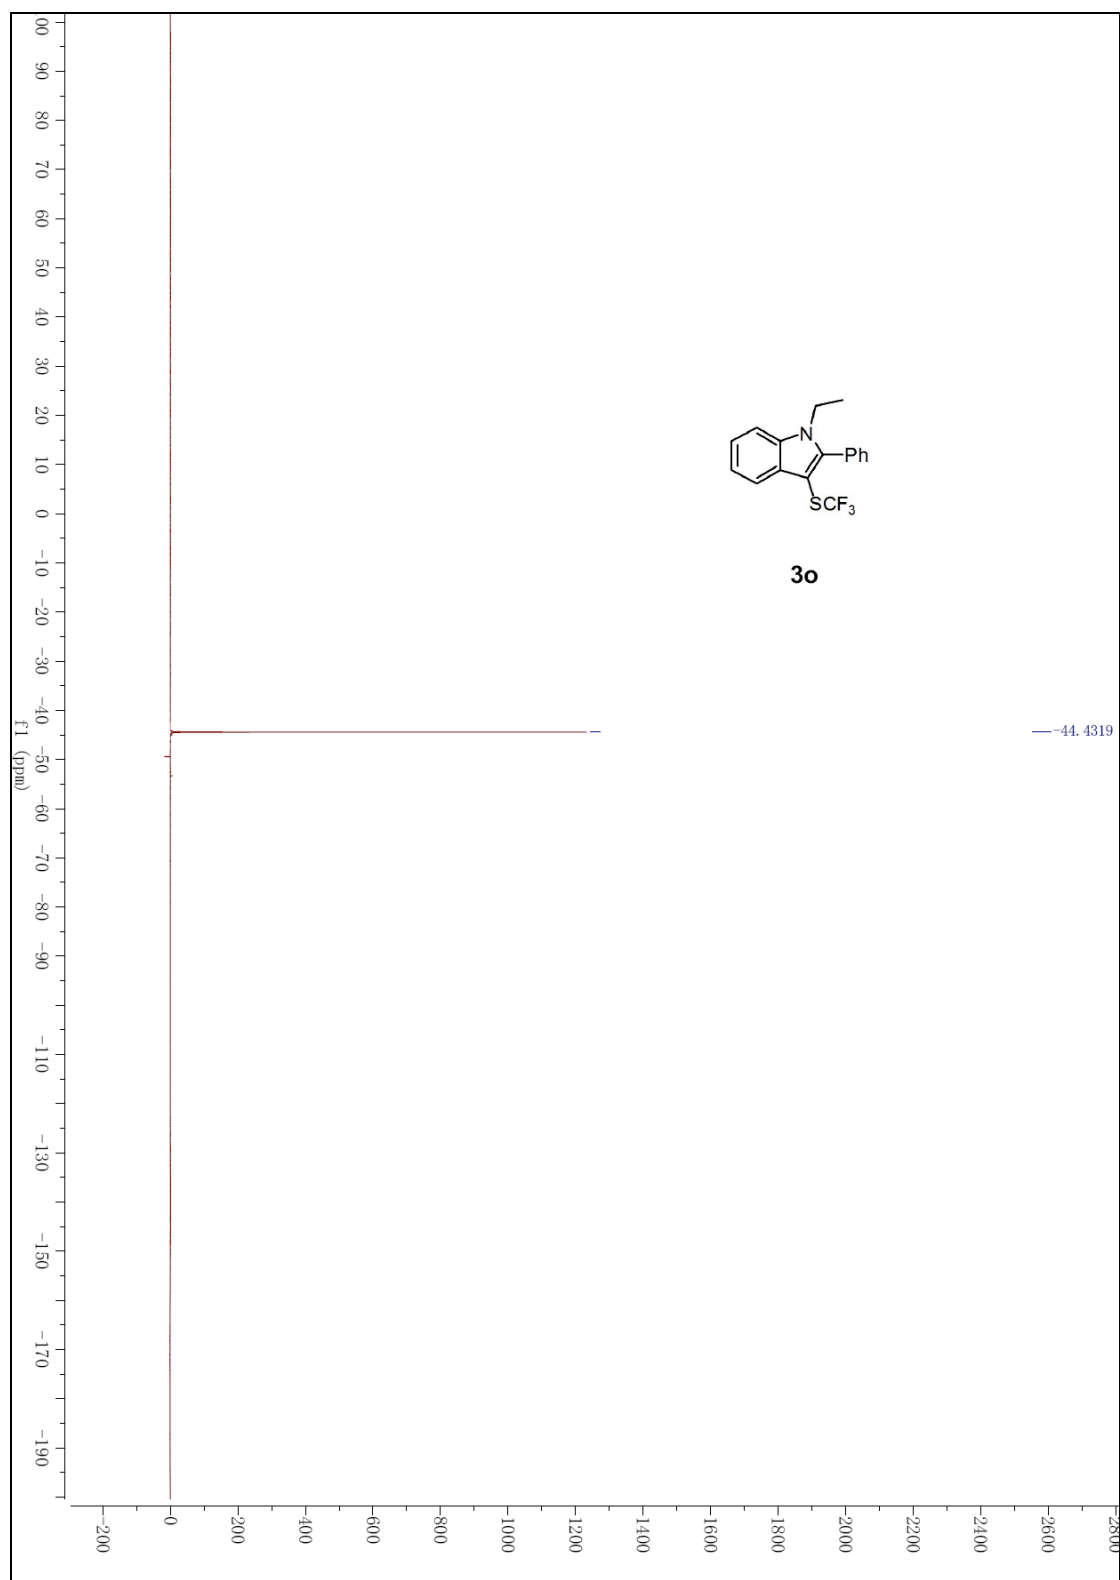



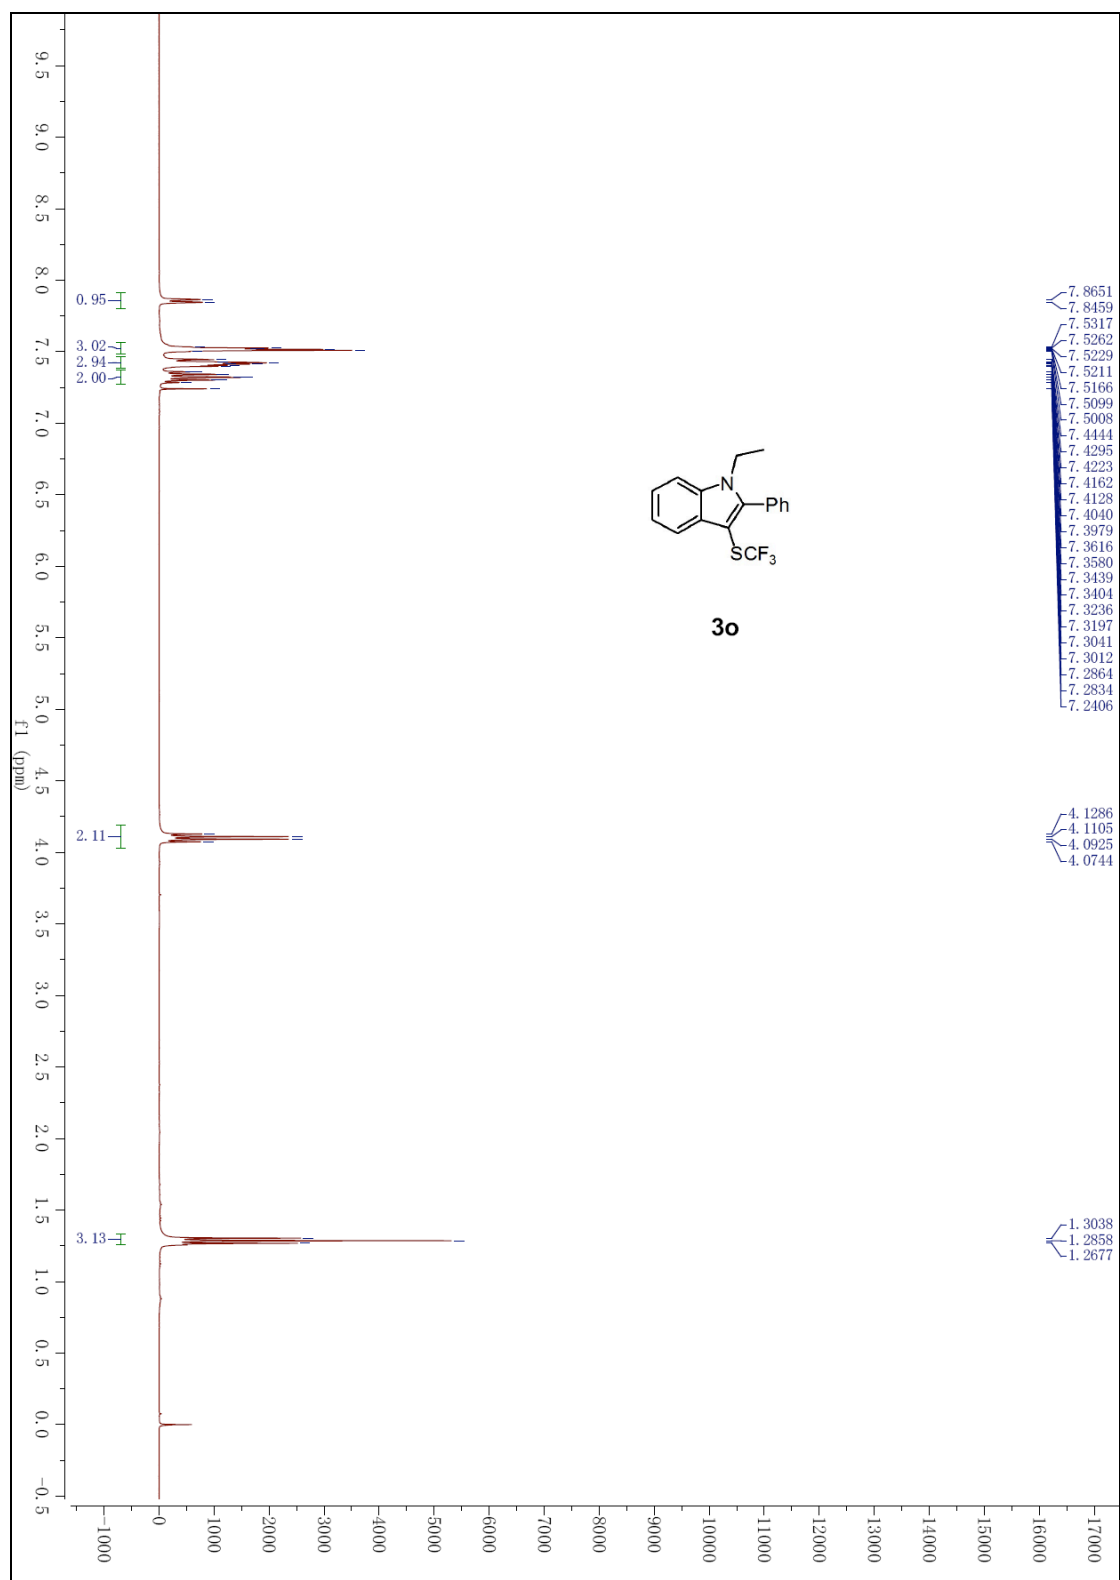

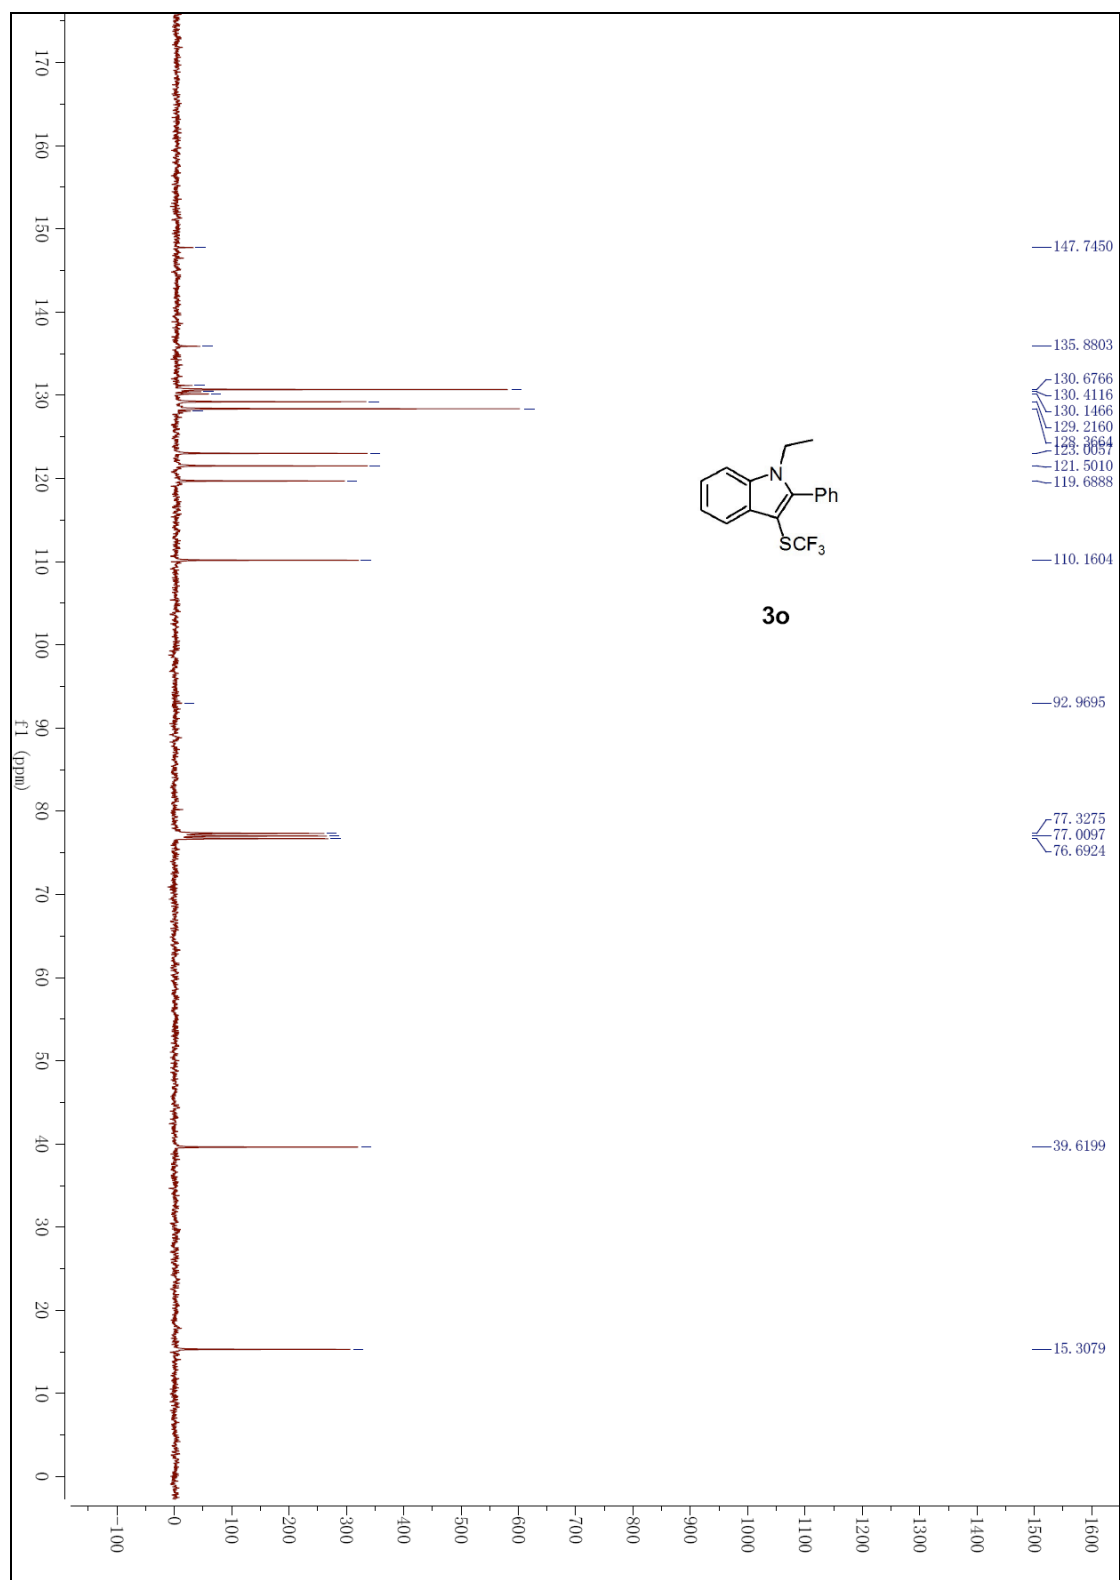

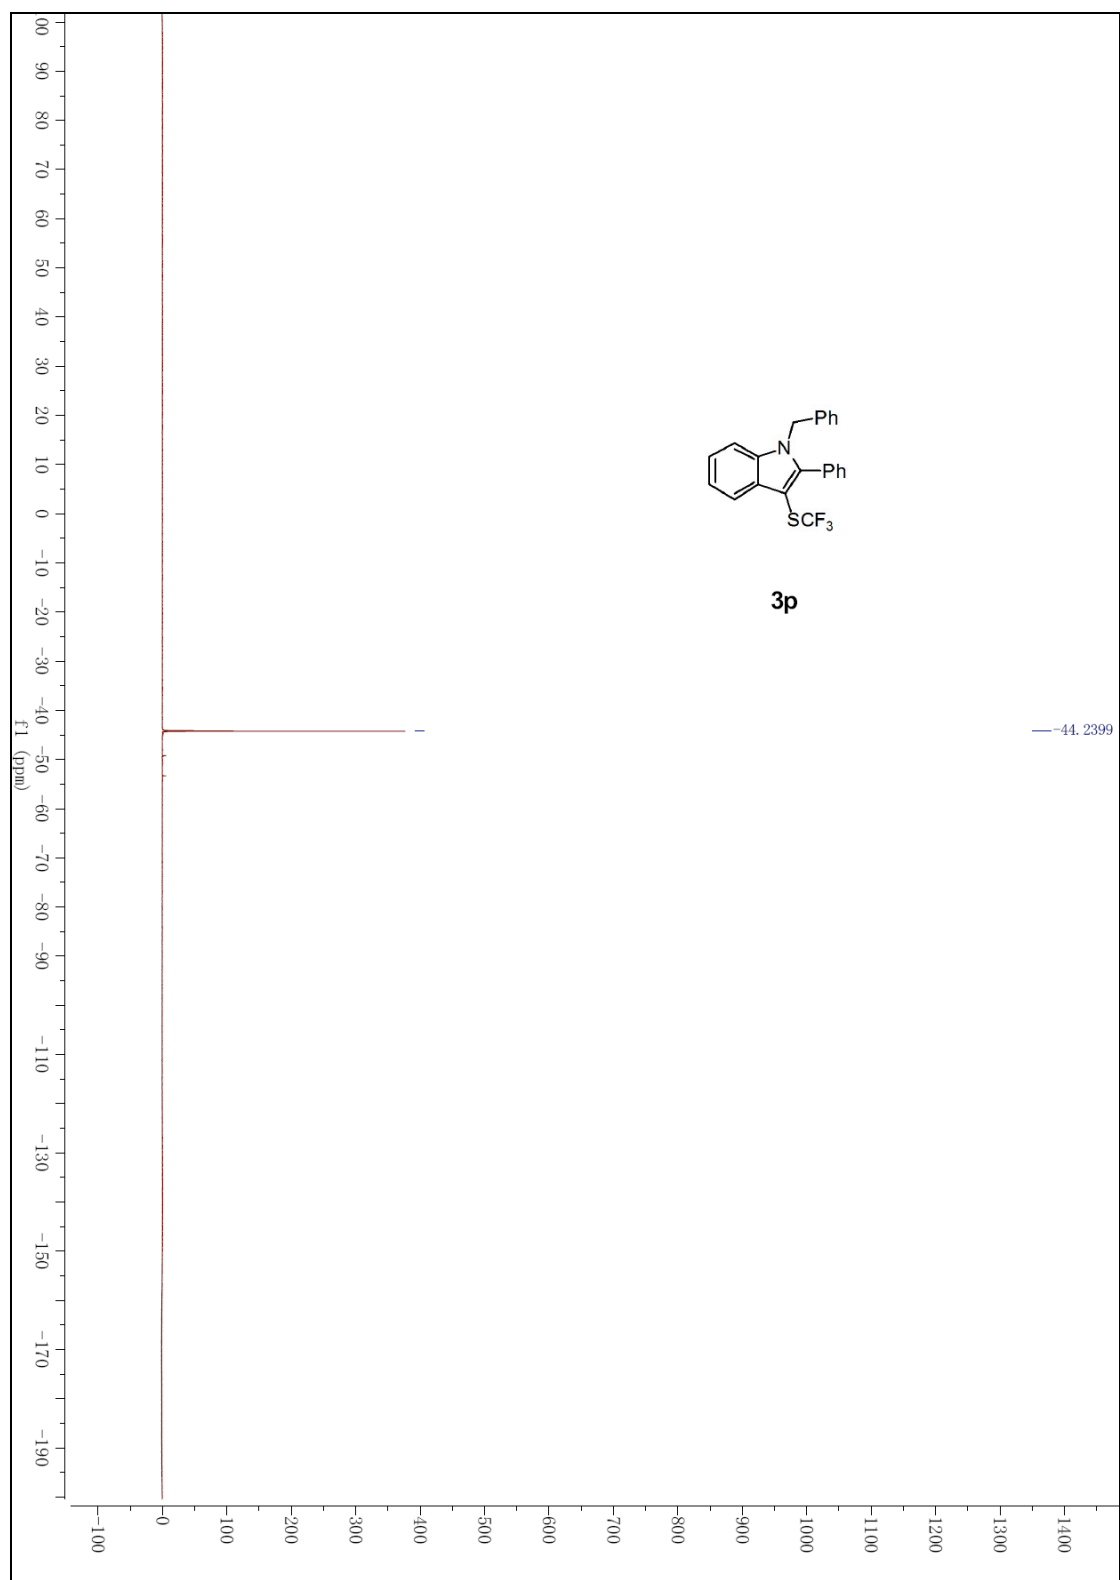

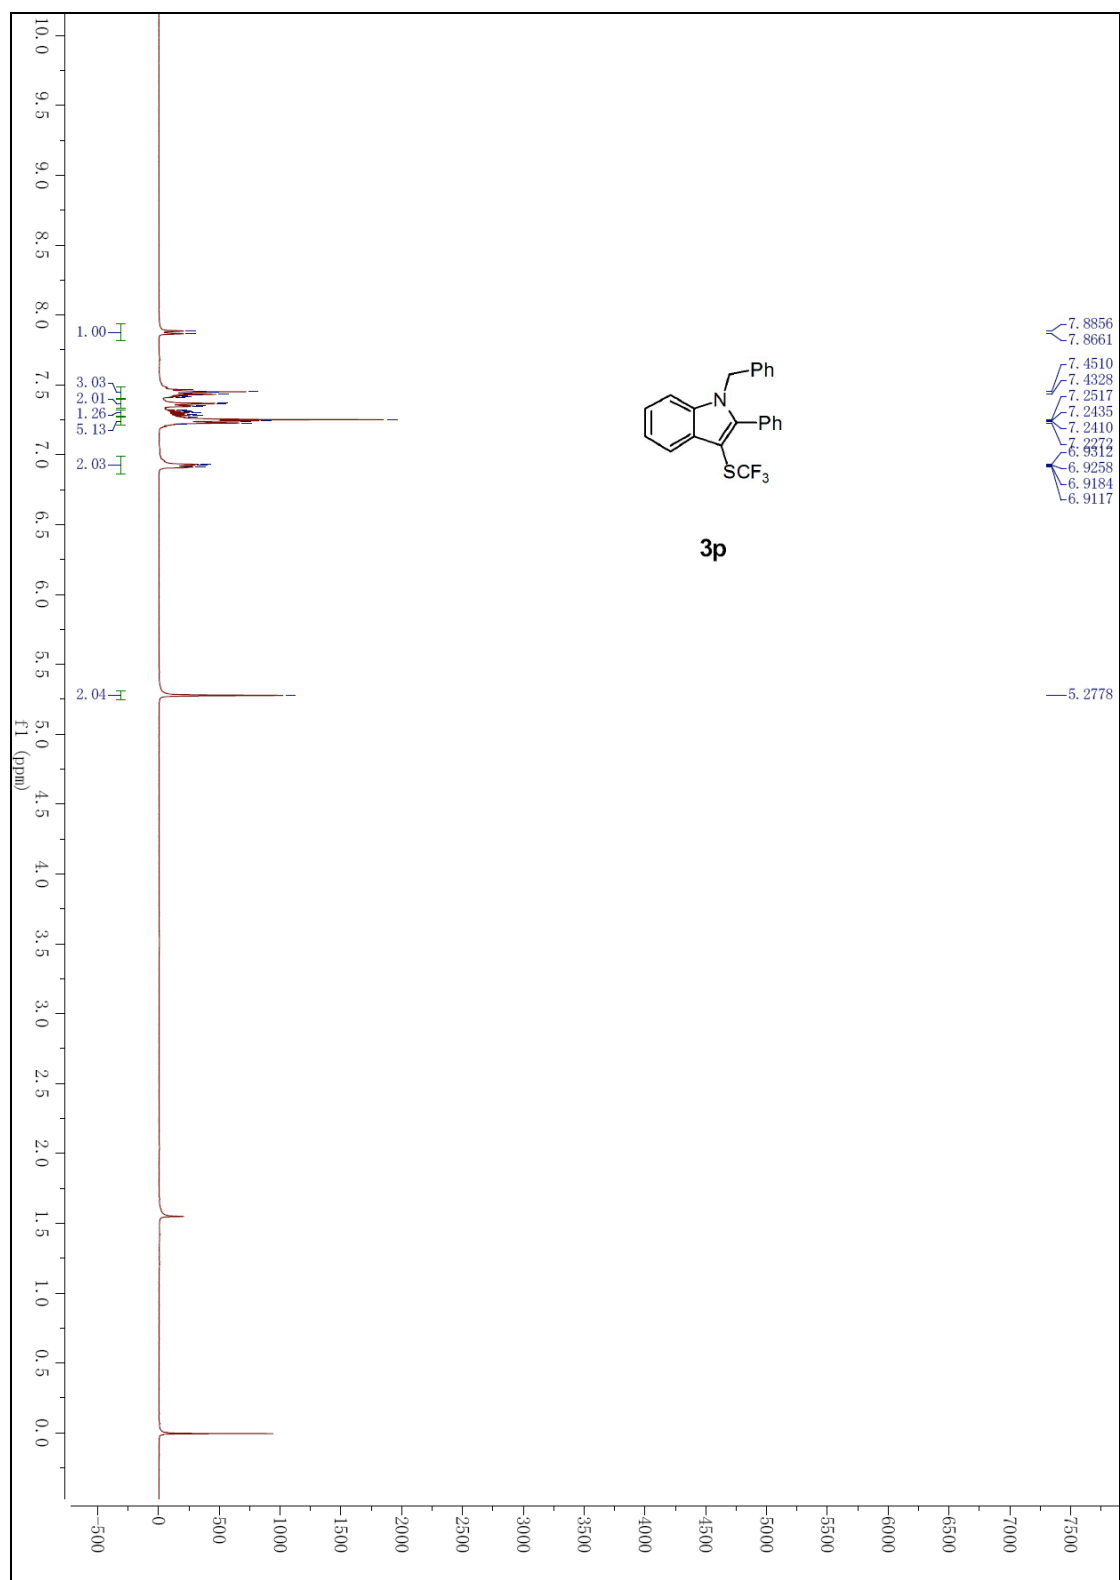

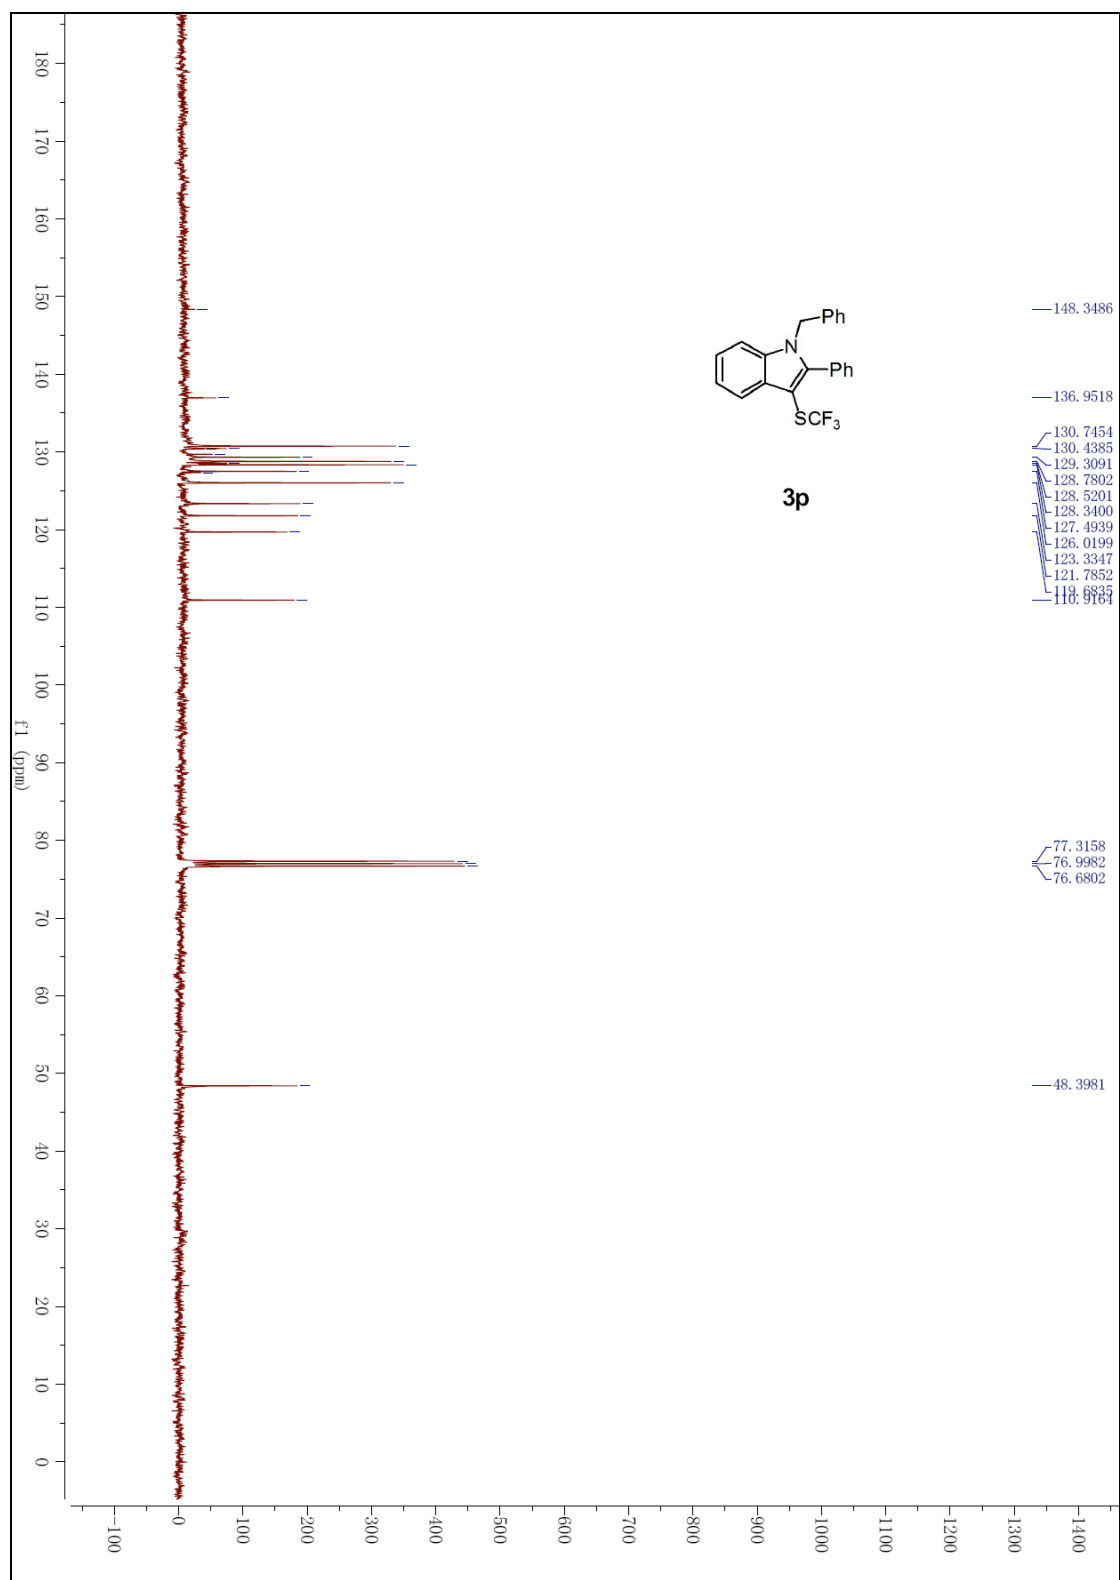

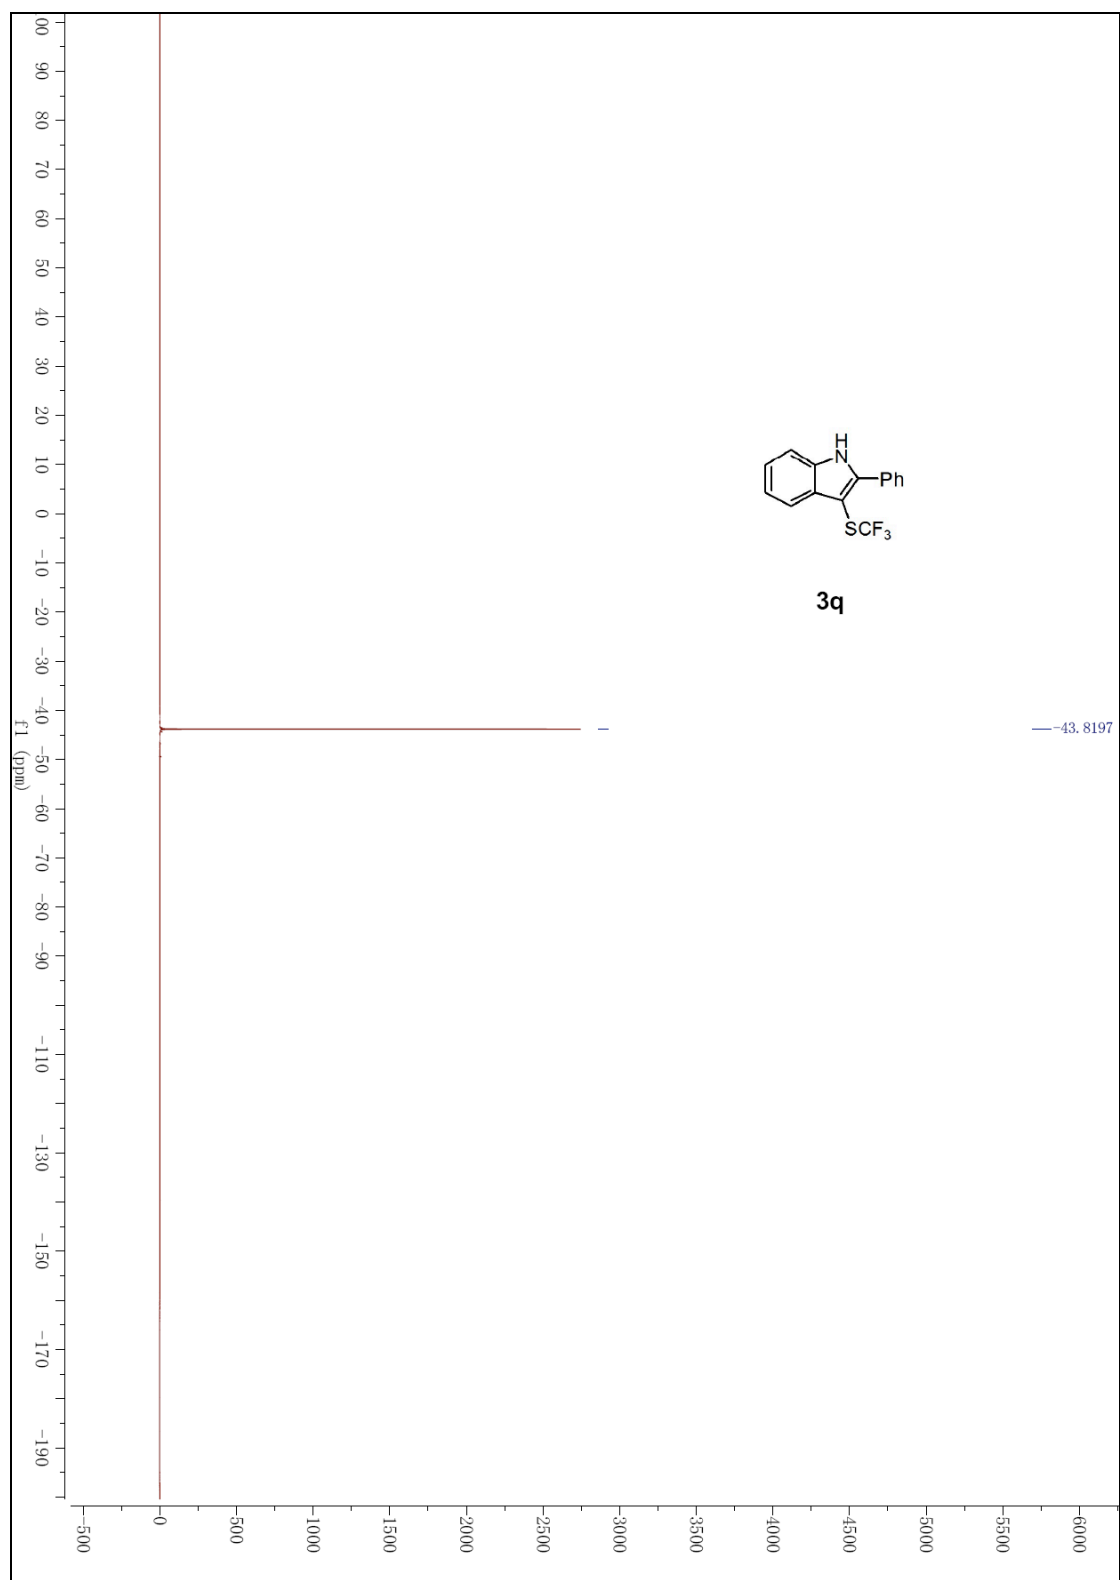

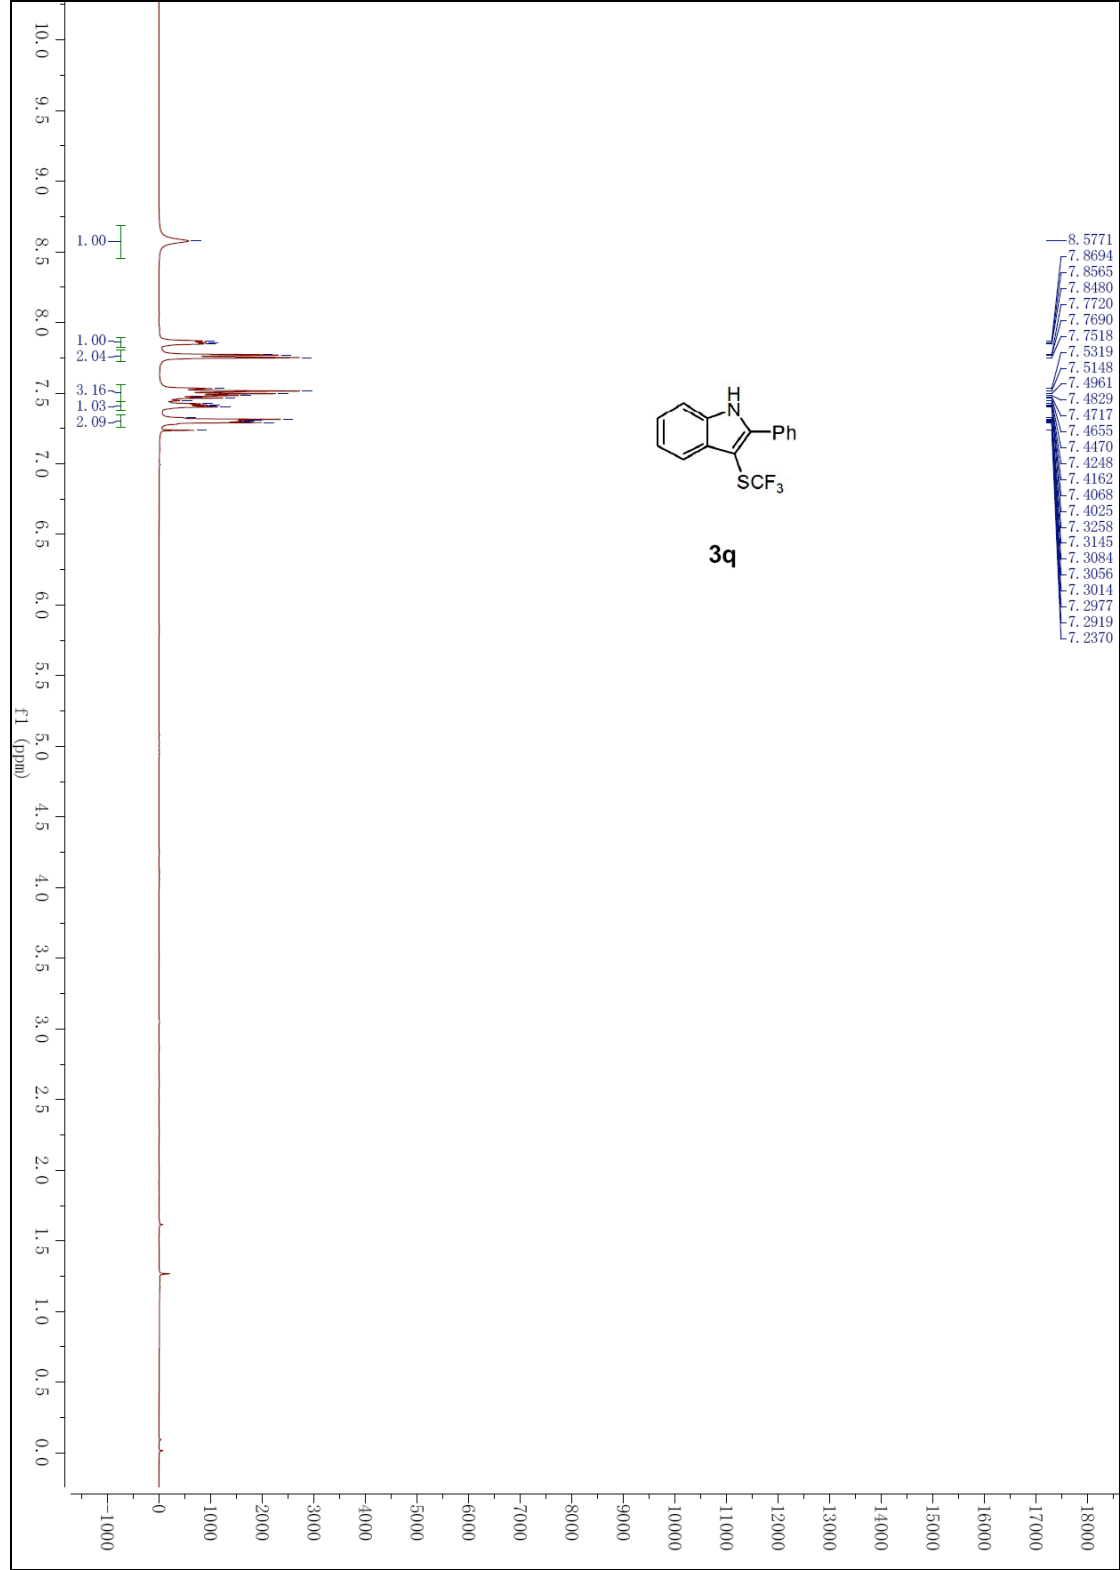

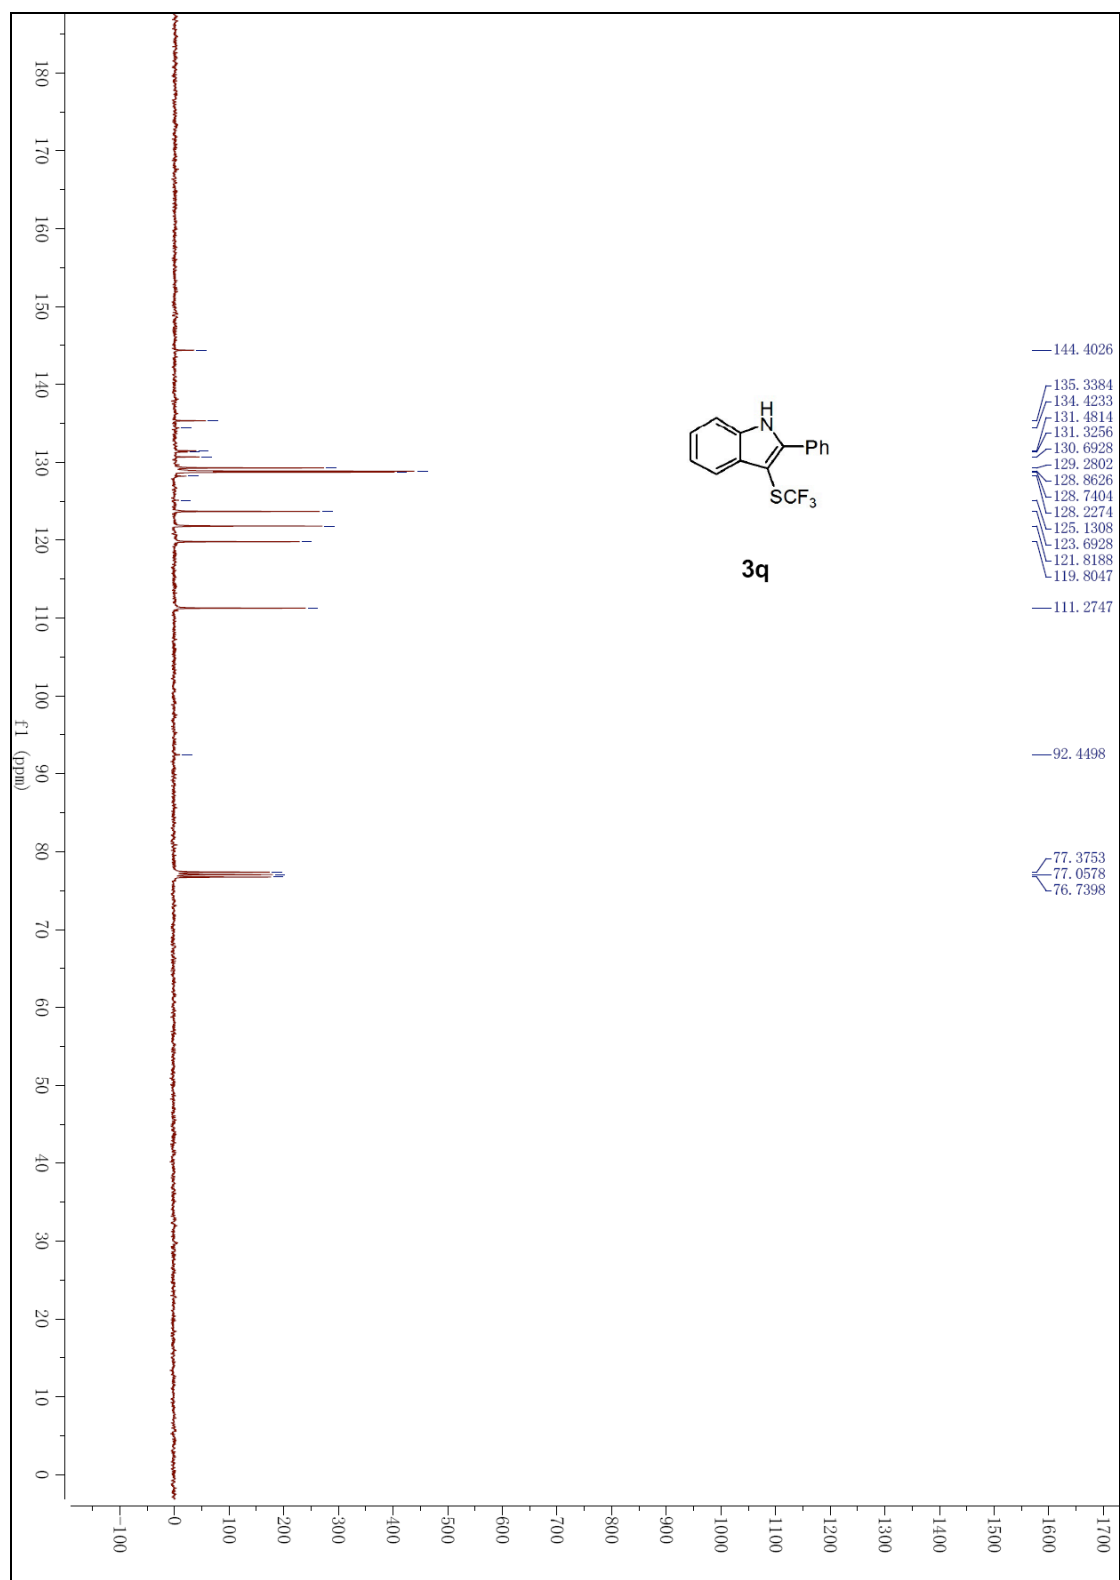

Supplement: c3cc45958f.pdf [file c3cc45958f.pdf]
